# Supplementary material for: Interaction of methanol with the oxygen-evolving complex: atomistic models, channel identification, species dependence, and mechanistic implications
Source: PubMed Central journal article supplement — Chem Sci. 2016 Jul 5;7(10):6463–76. doi: 10.1039/c6sc02340a (PMC5355959; doi:10.1039/c6sc02340a), 2016-07-05
Supplement: SC-007-C6SC02340A-s001.pdf [file SC-007-C6SC02340A-s001.pdf]

**Interaction of methanol with the oxygen-evolving complex:  
atomistic models, channel identification, species dependence,  
and mechanistic implications**

Marius Retegan, Dimitrios A. Pantazis\*

Max Planck Institute for Chemical Energy Conversion,  
Stiftrasse 34-38, 45470 Mülheim and der Ruhr, Germany

dimitrios.pantazis@cec.mpg.de

**SUPPORTING INFORMATION**

**Table S1.** Labeling of the water molecules included in the present computational model and the notation used in XRD structures.

|     | 3ARC       | 3WU2      | 4UB6      |
|-----|------------|-----------|-----------|
| W1  | A:HOH.1000 | A:HOH.595 | A:HOH.608 |
| W2  | A:HOH.999  | A:HOH.624 | A:HOH.607 |
| W3  | A:HOH.541  | A:HOH.569 | A:HOH.569 |
| W4  | A:HOH.540  | A:HOH.544 | A:HOH.568 |
| W5  | C:HOH.538  | C:HOH.633 | C:HOH.665 |
| W6  | A:HOH.539  | A:HOH.511 | A:HOH.567 |
| W7  | A:HOH.446  | A:HOH.609 | A:HOH.560 |
| W8  | A:HOH.442  | A:HOH.621 | A:HOH.559 |
| W9  | A:HOH.542  | A:HOH.564 | A:HOH.570 |
| W10 | A:HOH.358  | A:HOH.567 | A:HOH.510 |
| W11 | A:HOH.428  | A:HOH.509 | A:HOH.557 |
| W12 | A:HOH.923  | A:HOH.597 | A:HOH.601 |

**Table S2.** Relative energies (kcal/mol) for the two subsets of isomeric structures, obtained at either with the BP86 functional used in the optimization, or with the TPSSh functional in the high-spin or the most stable broken-symmetry formulation.

|       | BP86 | TPSSh (HS) | TPSSh (BS) |
|-------|------|------------|------------|
| W1-1  | 7.4  | 5.5        | 5.5        |
| W3-1  | 12.9 | 13.2       | 13.2       |
| W4-1  | 3.2  | 4.0        | 3.9        |
| W5-1  | 0.0  | 0.3        | 0.1        |
| W6-1  | 3.9  | 3.6        | 3.3        |
| W6-2  | 9.9  | 10.2       | 10.3       |
| W7-1  | 1.4  | 0.0        | 0.0        |
| W8-1  | 5.9  | 4.1        | 4.0        |
| W8-2  | 6.3  | 5.3        | 5.2        |
| W9-1  | 4.2  | 4.7        | 4.7        |
| W10-1 | 0.9  | 1.6        | 1.5        |
| W10-2 | 0.1  | 1.1        | 1.1        |
| W11-1 | 11.2 | 10.8       | 10.7       |
| W12-1 | 3.1  | 3.1        | 3.1        |
| W12-2 | 4.4  | 3.9        | 3.9        |
| W1-1d | 0.0  | 0.0        | 0.0        |
| W3-1d | 12.6 | 18.2       | 17.9       |
| W4-1d | 14.7 | 22.0       | 21.8       |

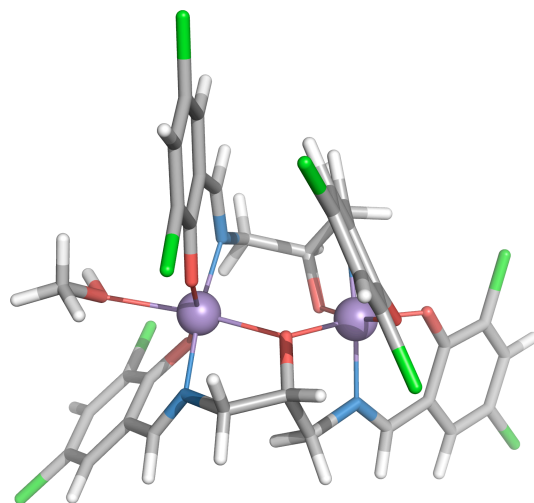

**Figure S1.** The mixed-valence complex  $(2\text{-OH-}3,5\text{-Cl}_2\text{-salpn})_2\text{Mn(III)Mn(IV)}$  (salpn =  $N,N'$ -bis(3,5-dichlorosalicylidene)-1,3-diamino-2-hydroxypropane) was used as a reference compound for the interaction of methanol in the experimental study. When methanol binds to the Mn(III) ion of the complex the  $^{13}\text{C}$  of the bound methanol had an isotropic hyperfine coupling constant  $A_{\text{iso}} = 0.65 \pm 0.05$  MHz and dipolar coupling  $T = 1.25 \pm 0.05$  MHz. The computed values for an optimized model of the bound methanol were  $A_{\text{iso}} = 0.71$  MHz and  $T = 2.31$  MHz.

## Sequence alignments

### Psba (D1)

```
sp | P51765 | PSBA_THEVL      MTTTLQRRESANLWERFCNWTSTDNRLYVGVFVIMIPTLLAATICFVIAFIAAPPVDI 60
sp | P69560 | PSBA_SPIOL      MTAILERRESESLWGRFCNWTSTENRLYIGWFGVLMIPTLLTATSVFIIAFIAAPPVDI 60
                               **: *:*:* * . ** *:*:*:*:*:*:*:*:*:*:*:*:*:*:* * :*****

sp | P51765 | PSBA_THEVL      DGIREPVSGLLYGNNIITGAVVPSSNAIGLHFYPIWEAASLDEWLYNGGPYQLIIFHFL 120
sp | P69560 | PSBA_SPIOL      DGIREPVSGLLYGNNIISGAIPTSAAIGLHFYPIWEAASLDEWLYNGGPYELIVLHFL 120
                               *****: **::* * *****:*****:*****:***:***

sp | P51765 | PSBA_THEVL      LGASCYMGREQWELSYRLGMRPWICVAYSAPLASAFVFLIYPIGQGSFSDGMPLGISGTF 180
sp | P69560 | PSBA_SPIOL      LGVACYMGREWELSFRLGMRPWIAVAYSAPVAAATAVFLIYPIGQGSFSDGMPLGISGTF 180
                               **.:*****:*****:*****.*****:*:* *****

sp | P51765 | PSBA_THEVL      NFMIVFQAEHNILMHPFHQLGVAGVFGGALFCAMHGSLVTSLSLIRETTETESANYGYKFG 240
sp | P69560 | PSBA_SPIOL      NFMIVFQAEHNILMHPFHMLGVAGVFGGSLFSAMHGSLVTSLSLIRETTENESANEGYRFG 240
                               ***** *****:*. *****.*****.*** **:*

sp | P51765 | PSBA_THEVL      QEETYNIVAAGHYFGRLIFQYASFNNSRSLHFFLAAWRVGVVFAALGISTMAFNLNGF 300
sp | P69560 | PSBA_SPIOL      QEETYNIVAAGHYFGRLIFQYASFNNSRSLHFFLAAWPVVGWIWFTALGISTMAFNLNGF 300
                               ***** *****:*. ***** **:*

sp | P51765 | PSBA_THEVL      NFNHSDVIDAKGNVINTWADIINRANLGMVEMHERNAHNFPLDLASAESAPVAMIAPSING 360
sp | P69560 | PSBA_SPIOL      NFNQSVVDSQGRVINTWADIINRANLGMVEMHERNAHNFPLDLAAIEAP-----STNG 353
                               ***:*:*:*:*.* *****:*. *****: *:*
```

### Psbd (D2)

```
sp | D0VWR8 | PSBD_THEVL      -----ERGFWDILDDWLKRDRFVFGWGSILLFPFCAYLALGGWLTGTTFFVTSWY 49
sp | P06005 | PSBD_SPIOL      MTIAVGKFTKDEKDLDFSMDDWLRDRFVFGWGSILLFPFCAYFALGGWFTGTTFFVTSWY 60
                               *: . ** :***:*****:*****:*****:*****

sp | D0VWR8 | PSBD_THEVL      THGLASSYLEGCNFLTAVSTPANSMGHSLLLWGPEAQGDFTRWCQLGGLWTFIALHGA 109
sp | P06005 | PSBD_SPIOL      THGLASSYLEGCNFLTAAVSTPANSLAHSLLLWGPEAQGDFTRWCQLGGLWAFVALHGA 120
                               *****.*****:. *****:*.*****

sp | D0VWR8 | PSBD_THEVL      FGLIGFMLRQFEIARLVGRVPYNAIAFSAPIAVFVSVFLIYPLGQSSWFFAPSFVAAIF 169
sp | P06005 | PSBD_SPIOL      FALIGFMLRQFELARSVQLRPYNAIAFSGPIAVFVSVFLIYPLGQSGWFFAPSFVAAIF 180
                               *.*****:* * :*****.*****.*****

sp | D0VWR8 | PSBD_THEVL      RFLFFQGFHNWTLNPFHMMGVAGVLGALLCAIHGATVENTLFDQEGEGASTFRAFNPQTQ 229
sp | P06005 | PSBD_SPIOL      RFILFFQGFHNWTLNPFHMMGVAGVLGAALLCAIHGATVENTLFDGDGANTFRAFNPQTQ 240
                               **:*****.*****:*****:***:***

sp | D0VWR8 | PSBD_THEVL      AEETYSMVTANRFWSQIFGIAFSNKRWLHFFMLFVPTGLWMSAIGVVGLALNLRSDYFI 289
sp | P06005 | PSBD_SPIOL      AEETYSMVTANRFWSQIFGVAFSNKRWLHFFMLFVPTGLWMSALGVVGLALNLRAYDFV 300
                               *****:*****:*****:*****:*****:***:

sp | D0VWR8 | PSBD_THEVL      SQEIRAAEDPEFETFYTKNLLNEGIRAWMAPQDQPHENFVFPPEEVLPRGNAL 342
sp | P06005 | PSBD_SPIOL      SQEIRAAEDPEFETFYTKNLLNEGIRAWMAAQDQPHENLIFPEEVLPRGNAL 353
                               *****:*****.*****:*****:*****
```

### Psbc (CP43)

```
sp | D0VWR7 | PSBC_THEVL      -----ATNRDQESSGFAWWAGNARLINLSGKLLGAHVAHAGLI 38
sp | P06003 | PSBC_SPIOL      MKTLYSLRRFPVETLFGNGLTLAGRDQETTFGAWWAGNARLINLSGKLLGAHVAHAGLI 60
                               :.***:*****:*****:*****

sp | D0VWR7 | PSBC_THEVL      VFWAGAMTLFELAHFIPEKPMYEQGLLILPHIATLGWGVGPGGEVVDTFPFVGVVHLI 98
sp | P06003 | PSBC_SPIOL      VFWAGAMNLFVAHFVPEKPMYEQGLLILPHLATLGWGVGPGGEVIDTFPFVSGVLHLI 120
                               *****.***:*:*:* *****:***:*****:*****:***:***
```

```

sp | D0VWR7 | PSBC_THEVL | SSAVLGFGGVYHAIRGPETLEEYSSFFGYDWKDKNKMTTILGFHLIVLGIGALLLVAKAM | 158
sp | P06003 | PSBC_SPIOL | SSAVLGFGGIYHALLGPETLEESFPFFGYVWVWDRNKMTTILGIHLILLGIGAFFLVFKAL | 180
*****:***: ***** .*** **:*:*****:***:*****:*** **

sp | D0VWR7 | PSBC_THEVL | FFGGLYDTWAPGGGDVVRVITNPTLDPRVIFGYLLKSPFGGEGWIVSVNNLEDVVGHIWI | 218
sp | P06003 | PSBC_SPIOL | YFGGVYDTWAPGGGDVVRKITNVTLSPSIIFGCLLKSPFGGEGWIVSVDDLEDIIGHVWI | 240
*:***:*****:*** ** *.* :*** *****:***:***:***

sp | D0VWR7 | PSBC_THEVL | GLICIAGGIWHILTPFGWARRAFIWSGEAYLSYSLGALSMMGFIAFCFVWFNNTVYPSE | 278
sp | P06003 | PSBC_SPIOL | GVICILGGIWHILTKPFAWARRALVWSGEAYLSYSLAALSVMGFIAFCFVWFNNTAYPSE | 300
*:*** *****:***.*****:*****:***:*** *****:***

sp | D0VWR7 | PSBC_THEVL | FYGPTGPEASQAQAMTFLIRDQKLGANVGSQAQPTGLGKYLMSRPTGEIIFGGETMRPWD | 338
sp | P06003 | PSBC_SPIOL | FYGPTGPEASQAQAFTLVRDQRLGANVGSQAQPTGLGKYLMSRPTGEVIFGGETMRPWD | 360
*****:***:***:*****:*****:*****:*****:*****:*****

sp | D0VWR7 | PSBC_THEVL | FRGPWLEPLRGPNGLDLNLKIKNDIQPWQERRAAEYMTAPLGLSLNSVGGVATEINSVNFV | 398
sp | P06003 | PSBC_SPIOL | LRAPWLEPLRGPNGLDLNLKIKNDIQPWQERRAAEYMTAPLGLSLNSVGGVATEINAVNYV | 420
:*.*****:***:***:*****:*****:*****:*****:***

sp | D0VWR7 | PSBC_THEVL | SPRSWLATSHFVLAFFFLVGHVHAGRARAAAAGFEKIDRESEPVLSMPSLD | 451
sp | P06003 | PSBC_SPIOL | SPRSWLSTSHFVLFVGHVHAGRARAAAAGFEKIDRDFEPVLSMPTLN | 473
*****:*****:***:*****:*****:*****:*****:*****:***

```

**PsbB (CP47)**

```

sp | D0VWR1 | PSBB_THEVL | -GLPWYRVHTVLINDPGRLLIAAHLMTALVAGWAGSMALYELATFDPSDPVLPMPWRQGM | 59
sp | P04160 | PSBB_SPIOL | MGLPWYRVHTVVLNDPGRLLISVHIMHTALVAGWAGSMALYELAVFDPSDPVLPMPWRQGM | 60
*****:***:*****:*.***:*****:***:*****:*****:*****:*****

sp | D0VWR1 | PSBB_THEVL | FVLPFMARLGVTSWSGWSITGETGIDPGFWSFEGVALAHIVLSGLLFLAACWHVWYDLD | 119
sp | P04160 | PSBB_SPIOL | FVLPFMARLGVTSWSGWSITGGTITDPGIWSYEGVAGAHIMFSGLCFLAAIWHVWYDLD | 120
**:*:***:***:*.***:***** * **:*:***:*** **:*:*** *****

sp | D0VWR1 | PSBB_THEVL | ELFRDPRTEGEPALDLPKMFGLHFLAGLLCFGFGAFHLLTGLFGPMWVSDPYGLTGSVQP | 179
sp | P04160 | PSBB_SPIOL | EIFSDERTGKPSLDLPKIFGIHLFLSGLVACFVGFVAFHVTGLYGPVWSDPYGLTGSVQP | 180
*:* * **:*:***:***:*****:***:*****:***:*****:*****:***

sp | D0VWR1 | PSBB_THEVL | VAPEWGPDPGNPNYPPGGVVAHHIAAGIVGIIAGLPHILVRRPPQRLYKALRMGNIETVLS | 239
sp | P04160 | PSBB_SPIOL | VSPAWEVGFDPFVPGGIASHHIAAGTLGILAGLPHLSVRPPQRLYKALRMGNIETVLS | 240
*:* ** :***:***:***:*.***** :***:*****: *****:*****

sp | D0VWR1 | PSBB_THEVL | SIAAVFFAAFVAGTMWYGSATPIELFGPTRYQWDSYFQQEINRRVQASLASGATLEE | 299
sp | P04160 | PSBB_SPIOL | SIAAVFFAAFVAGTMWYGSATPIELFGPTRYQWQGYFQQEIIYRRVSAGLAENQSFSE | 300
*****:*****:*****:*****.***** **.*.***. :*.**

sp | D0VWR1 | PSBB_THEVL | AWSAIPKELAFYDYIGNNPAKGLFRTPGMNKGDIAGQAWKHAVFRNKEGEEELFVRRMP | 359
sp | P04160 | PSBB_SPIOL | AWSAIPKELAFYDYIGNNPAKGLFRAGSMDNGDIAVGLWGHPIFRDKEGRELFRVRRMP | 360
*** *****:*****:*.***:***** .* **.*:***:*****

sp | D0VWR1 | PSBB_THEVL | AFFESFPVILTDKNGVVKADIPFRRAESKYSFEQQGVTVSFGGELNGQTFDPTVKSYS | 419
sp | P04160 | PSBB_SPIOL | TFFETFPVVIDDGDIVRADVPFRRAESKYSVEQVGVTVSFGGELNGVSYSDPATVKYS | 420
:***:***:*** * :*:***:***:*****.*** *****:***** :*:***.***

sp | D0VWR1 | PSBB_THEVL | ARKAIFGEIFEFDTELTNSDGIFFRTSPRGWTFHAHVALLFFFGHIWHGARTLFRDVFS | 479
sp | P04160 | PSBB_SPIOL | ARRAQLGEIFEFDTRATLKSVDGFRSSPRGWTFGHASFALLFFFGHIWHGSRTRLFRDVFA | 480
**:* :*****:*** **:*:***:***:*****.*** *****:*****:*****

sp | D0VWR1 | PSBB_THEVL | GIDPELSPEQVEWGFYQKVGVDVTRK--- | 505
sp | P04160 | PSBB_SPIOL | GIDPDLV-QVEFGAFQKIGDPTTRRQGV | 508
*****:*. **:*:***:***:***:***

```

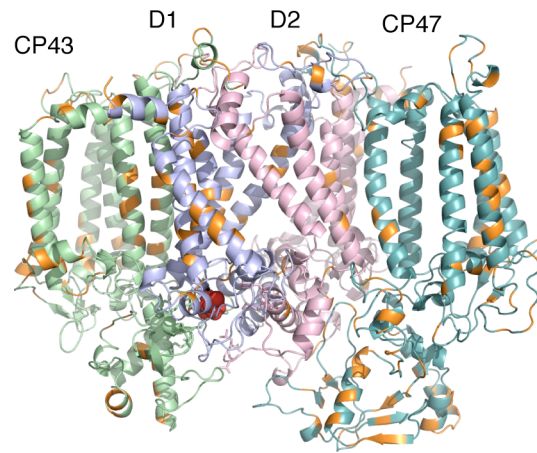

**Figure S2.** Residues with variations in the four core PS-II proteins between *T. vulcanus* and *S. oleracea* indicated in orange on the crystallographic model of *T. vulcanus*.

## Cartesian coordinates of optimized structures

S<sub>2</sub>

|    |               |               |               |
|----|---------------|---------------|---------------|
| Mn | -24.861785928 | -35.538136067 | 203.952836733 |
| Mn | -27.335109674 | -35.218881837 | 205.228903286 |
| Mn | -27.319691595 | -33.337070550 | 203.161655355 |
| Mn | -27.557473508 | -33.171049722 | 200.424157196 |
| Ca | -27.892136398 | -36.724877375 | 202.207552892 |
| O  | -26.433130903 | -36.507855690 | 204.216717740 |
| O  | -28.354801738 | -34.721993942 | 203.804147724 |
| O  | -25.993205871 | -34.061808099 | 204.488953897 |
| O  | -28.490890642 | -32.604391906 | 201.988704612 |
| O  | -26.758946473 | -34.302260222 | 201.691513026 |
| O  | -28.413423888 | -31.695457382 | 199.312428948 |
| O  | -26.563235675 | -33.768942740 | 198.994892996 |
| O  | -27.634968089 | -37.252367399 | 199.890742987 |
| O  | -28.039341352 | -39.132888012 | 202.493578731 |
| H  | -30.454672257 | -26.816515356 | 200.177841532 |
| C  | -30.241434041 | -27.113394923 | 201.222163048 |
| H  | -30.724376967 | -26.361921070 | 201.871644953 |
| C  | -28.733053802 | -27.325091851 | 201.413248157 |
| C  | -28.185270472 | -28.477022208 | 200.550477373 |
| O  | -28.948775063 | -29.523406886 | 200.459577854 |
| O  | -27.053969440 | -28.366857946 | 200.001609672 |
| C  | -32.924380974 | -41.850903001 | 196.489835023 |
| C  | -31.511814662 | -41.574542267 | 195.941235862 |
| C  | -30.521250122 | -41.382067185 | 197.078210517 |
| C  | -29.959209517 | -42.494978766 | 197.741658078 |
| C  | -30.196292183 | -40.096021158 | 197.564999105 |
| C  | -29.101170299 | -42.342324176 | 198.844083063 |
| C  | -29.338001382 | -39.923079559 | 198.664011659 |
| C  | -28.784652106 | -41.046915600 | 199.309373366 |
| O  | -27.915527714 | -40.844159159 | 200.366110826 |
| H  | -33.785374771 | -32.318033797 | 197.913158946 |
| C  | -32.844739229 | -31.791422270 | 197.688620054 |
| C  | -31.614691049 | -32.674120863 | 197.700453713 |
| O  | -30.465353131 | -32.191866129 | 197.606466108 |
| H  | -32.702700921 | -30.968509307 | 198.409442407 |
| N  | -31.846662635 | -34.016380036 | 197.754167288 |
| C  | -30.825020950 | -35.049750904 | 197.612821044 |
| C  | -31.085048620 | -35.968740114 | 196.396987664 |
| O  | -30.560307105 | -37.088990372 | 196.316490281 |
| C  | -30.619743230 | -35.852589241 | 198.909869951 |
| C  | -29.801747619 | -35.198604965 | 200.025613411 |
| O  | -29.860670308 | -35.684607434 | 201.191556015 |
| O  | -29.017807757 | -34.239765021 | 199.673987144 |
| N  | -31.868526103 | -35.426801080 | 195.426252855 |
| C  | -31.935591064 | -35.967610997 | 194.072816921 |
| H  | -31.190722970 | -35.442656016 | 193.449429046 |
| H  | -21.516056985 | -41.187717964 | 202.032942996 |
| C  | -22.352883011 | -41.458335052 | 202.717391991 |
| C  | -22.775252530 | -42.908891989 | 202.609197145 |
| O  | -23.549718834 | -43.427235465 | 203.434279291 |
| C  | -23.554330928 | -40.509799408 | 202.464166438 |
| C  | -23.074982781 | -39.048973689 | 202.401949194 |
| C  | -24.163150750 | -37.986922678 | 202.504852238 |
| O  | -25.239740982 | -38.036035457 | 201.863905973 |
| O  | -23.836536879 | -37.004529541 | 203.300744624 |
| N  | -22.261377152 | -43.592536603 | 201.546244404 |
| C  | -22.629343007 | -44.962152989 | 201.252063010 |
| H  | -21.726399006 | -45.520631993 | 200.924621000 |
| C  | -23.736602233 | -45.089000827 | 200.179591385 |
| C  | -24.991097401 | -44.402399200 | 200.602752711 |
| C  | -25.517226210 | -43.166066084 | 200.270526025 |
| N  | -25.829721406 | -44.889582665 | 201.595596251 |
| C  | -26.805366994 | -43.975205399 | 201.836491204 |
| N  | -26.639803086 | -42.920332648 | 201.040838528 |
| H  | -19.262625969 | -31.517297027 | 202.779917034 |
| C  | -20.112713046 | -31.328696950 | 202.090234974 |
| C  | -21.154479133 | -30.546219966 | 202.873658340 |



|   |               |               |               |
|---|---------------|---------------|---------------|
| O | -21.422623390 | -30.807583267 | 204.067098423 |
| C | -20.723130514 | -32.620743254 | 201.485283333 |
| C | -21.596553322 | -33.371001523 | 202.436634139 |
| C | -22.941843450 | -33.698187735 | 202.404286352 |
| N | -21.136481113 | -33.849526777 | 203.655488648 |
| C | -22.153701748 | -34.433141662 | 204.322789004 |
| N | -23.265946389 | -34.358857765 | 203.580904161 |
| N | -21.812302652 | -29.591265340 | 202.171505335 |
| C | -22.896307039 | -28.815019103 | 202.759170887 |
| H | -22.557558961 | -28.453985926 | 203.752878110 |
| C | -24.185882268 | -29.642358481 | 202.949431592 |
| C | -24.736195779 | -30.208674243 | 201.640171400 |
| C | -25.723084287 | -31.350890133 | 201.779736642 |
| O | -26.002828892 | -31.830447164 | 202.926725716 |
| O | -26.202307743 | -31.787340981 | 200.674849543 |
| H | -24.814841716 | -28.958797008 | 209.210681283 |
| C | -25.289739041 | -29.704836066 | 209.874337882 |
| H | -25.215627963 | -29.314216941 | 210.902923103 |
| C | -24.616020481 | -31.087347628 | 209.714980145 |
| C | -24.554804520 | -31.568448328 | 208.292228522 |
| C | -25.337847766 | -32.455747038 | 207.572177698 |
| N | -23.600477183 | -31.117114509 | 207.381720344 |
| C | -23.780495317 | -31.695998184 | 206.175875225 |
| N | -24.840404602 | -32.507056533 | 206.279497644 |
| H | -24.708982022 | -37.374837932 | 210.156820979 |
| C | -25.333665000 | -37.110846091 | 209.273415034 |
| C | -26.303145078 | -38.222427048 | 208.875439519 |
| O | -26.048271080 | -39.055552550 | 207.984375526 |
| C | -24.387417934 | -36.715183543 | 208.140455231 |
| C | -24.993045348 | -36.042981760 | 206.913315482 |
| O | -26.243489086 | -35.744556592 | 206.895323949 |
| O | -24.178946258 | -35.815295585 | 205.962364802 |
| N | -27.490103405 | -38.237402954 | 209.552364421 |
| C | -28.420987935 | -39.357108047 | 209.469748001 |
| C | -29.301748745 | -39.452381522 | 208.215535273 |
| O | -29.914034345 | -40.505610706 | 207.966620239 |
| N | -29.386953112 | -38.333030654 | 207.463532804 |
| C | -30.074316401 | -38.290827459 | 206.176614565 |
| C | -29.372525325 | -37.277617809 | 205.264699753 |
| O | -29.572968409 | -37.292097203 | 204.038606686 |
| O | -28.620264570 | -36.432564028 | 205.920514350 |
| O | -25.491782017 | -37.824519313 | 197.278517870 |
| O | -27.485003631 | -35.873618741 | 197.687829943 |
| O | -26.460820279 | -30.181507324 | 198.051669254 |
| O | -24.563770993 | -32.018843466 | 198.225740003 |
| O | -29.789534817 | -30.389476911 | 202.837278015 |
| O | -25.773209466 | -39.342989052 | 199.588813581 |
| O | -26.801614385 | -39.051882682 | 205.066937320 |
| H | -30.319638044 | -30.628040909 | 209.000901856 |
| C | -30.997750769 | -31.051073852 | 208.236196866 |
| H | -31.843803221 | -31.521736139 | 208.767318120 |
| C | -30.273882123 | -32.094797835 | 207.373175395 |
| C | -28.976372391 | -31.550430609 | 206.744262571 |
| C | -28.305195409 | -32.560046700 | 205.837011258 |
| O | -28.063289691 | -33.728304079 | 206.320928274 |
| O | -28.012927114 | -32.187399416 | 204.653371616 |
| H | -36.649870554 | -31.795435780 | 206.870070514 |
| C | -36.971478990 | -32.276075031 | 205.926511022 |
| C | -35.755198226 | -32.775946754 | 205.121108235 |
| C | -34.813655920 | -33.668419535 | 205.953476680 |
| C | -33.729958222 | -34.411263920 | 205.160808226 |
| N | -32.745671612 | -33.500370025 | 204.553536020 |
| C | -31.812969295 | -33.884830721 | 203.652733783 |
| N | -31.640819343 | -35.189443429 | 203.378344816 |
| N | -31.094483172 | -32.977406000 | 202.976097573 |
| O | -27.599414327 | -29.301010511 | 204.188293675 |
| H | -32.908965934 | -42.739726692 | 197.148996345 |
| H | -33.264613382 | -40.999726189 | 197.109739891 |
| H | -33.700323023 | -42.030393000 | 195.723192981 |
| H | -31.524862207 | -40.672770032 | 195.299864694 |
| H | -31.188504420 | -42.417238747 | 195.299352210 |
| H | -30.195966358 | -43.509255578 | 197.390157498 |
| H | -28.672183274 | -43.222618689 | 199.336978240 |

|   |               |               |               |
|---|---------------|---------------|---------------|
| H | -29.071560097 | -38.920980937 | 199.024185330 |
| H | -30.600370366 | -39.201860913 | 197.072287812 |
| H | -27.454173638 | -41.769674013 | 200.710683742 |
| H | -25.163176043 | -42.446088757 | 199.529898818 |
| H | -27.602233259 | -44.113054288 | 202.569014719 |
| H | -28.784501476 | -37.534620128 | 207.680532769 |
| H | -27.643757561 | -37.538299778 | 210.277295155 |
| H | -21.532232101 | -29.404088858 | 201.210942484 |
| H | -21.673924714 | -43.091515705 | 200.882366416 |
| H | -22.970263322 | -45.417501934 | 202.198430939 |
| H | -23.917790164 | -46.163577825 | 199.985817106 |
| H | -23.391450931 | -44.643213648 | 199.229607911 |
| H | -22.542923772 | -38.867051648 | 201.446113167 |
| H | -24.065491600 | -40.785264802 | 201.522445810 |
| H | -21.981022772 | -41.298482280 | 203.747099011 |
| H | -22.347358954 | -38.850061364 | 203.207953459 |
| H | -24.296655281 | -40.638785714 | 203.273116966 |
| H | -26.358511432 | -29.757998145 | 209.600611770 |
| H | -26.192721659 | -33.064796030 | 207.867760273 |
| H | -23.144271182 | -31.532318578 | 205.298656768 |
| H | -23.688744444 | -33.537454869 | 201.624425037 |
| H | -22.078965642 | -34.917167950 | 205.296324631 |
| H | -19.698981750 | -30.722741924 | 201.263725465 |
| H | -23.074806610 | -27.939049124 | 202.113304814 |
| H | -29.872938423 | -34.529689951 | 197.386986168 |
| H | -32.806383178 | -34.325558808 | 197.911292725 |
| H | -32.924841824 | -31.336053841 | 196.684754926 |
| H | -32.166278668 | -34.460917551 | 195.557435040 |
| H | -30.784869172 | -28.059885496 | 201.392065720 |
| H | -19.907434662 | -33.269974849 | 201.114823929 |
| H | -21.336242082 | -32.357162314 | 200.605471279 |
| H | -25.922118025 | -36.228837137 | 209.591557617 |
| H | -29.969464125 | -39.280020910 | 205.693396034 |
| C | -31.569759672 | -37.945017169 | 206.312024384 |
| H | -32.056907495 | -37.964820322 | 205.321126460 |
| H | -32.065812942 | -38.692530475 | 206.953420179 |
| H | -31.698753371 | -36.947592457 | 206.769784294 |
| H | -29.094805204 | -39.310318819 | 210.342314628 |
| H | -27.858742051 | -40.306731940 | 209.536503992 |
| H | -23.605314263 | -36.030973308 | 208.519220356 |
| H | -23.852625360 | -37.604885460 | 207.759906046 |
| H | -30.045614176 | -36.763567963 | 198.648459211 |
| H | -31.580086161 | -36.195206072 | 199.334766055 |
| H | -31.384040821 | -30.213258331 | 207.627715320 |
| H | -30.026801090 | -32.987629261 | 207.976977728 |
| H | -28.253207146 | -31.294804455 | 207.544984373 |
| H | -30.945124265 | -32.450787166 | 206.565901609 |
| H | -29.151500770 | -30.633259232 | 206.155439770 |
| H | -28.154401051 | -26.414593236 | 201.178776287 |
| H | -28.496073081 | -27.593119942 | 202.462363156 |
| H | -25.158713993 | -31.846361070 | 210.305818572 |
| H | -23.585999001 | -31.055575759 | 210.118512911 |
| H | -25.263262287 | -33.112262154 | 205.494060189 |
| H | -37.548238011 | -31.526088969 | 205.357492977 |
| H | -35.195086738 | -31.906180948 | 204.722896222 |
| H | -35.409144621 | -34.447825977 | 206.466643613 |
| H | -33.205265845 | -35.111391194 | 205.841617953 |
| H | -37.646926814 | -33.110776221 | 206.189612786 |
| H | -36.103715025 | -33.344086493 | 204.235343058 |
| H | -34.339322260 | -33.072808889 | 206.760040050 |
| H | -32.845769925 | -32.501568401 | 204.721481860 |
| H | -34.200301996 | -35.013821673 | 204.358159240 |
| H | -31.179401074 | -31.969770630 | 203.145202048 |
| H | -31.944594334 | -35.908634919 | 204.026879484 |
| H | -30.189360130 | -33.233971934 | 202.543888911 |
| H | -30.918621410 | -35.458657923 | 202.695081285 |
| H | -23.965246298 | -30.473505674 | 203.638968841 |
| H | -25.241693276 | -29.436756680 | 201.027122892 |
| H | -24.954274471 | -29.016575550 | 203.438917940 |
| H | -23.909772578 | -30.603612283 | 201.014243007 |
| H | -20.195624794 | -33.720595002 | 204.025007364 |
| H | -25.808502760 | -33.164601672 | 198.720904631 |
| H | -29.199763417 | -31.974939979 | 198.758437893 |

|   |               |               |               |
|---|---------------|---------------|---------------|
| H | -28.630508043 | -30.773780688 | 199.811578950 |
| H | -29.712614900 | -29.939518651 | 201.945248009 |
| H | -29.217337742 | -31.187499354 | 202.644068803 |
| H | -27.123296474 | -30.151457950 | 204.259449680 |
| H | -28.446923012 | -29.599830882 | 203.754920716 |
| H | -32.943471747 | -35.820500513 | 193.651925823 |
| H | -31.698163011 | -37.042165904 | 194.101174383 |
| H | -26.526826989 | -39.954752406 | 199.823784752 |
| H | -25.467473642 | -38.972429330 | 200.470194129 |
| H | -27.671209129 | -39.497446484 | 203.331934111 |
| H | -27.657873562 | -36.688667151 | 199.033791014 |
| H | -26.710758565 | -36.421976421 | 197.395272805 |
| H | -27.094962539 | -35.034645278 | 198.092476887 |
| H | -25.737733669 | -38.384611376 | 196.518489479 |
| H | -25.596249939 | -38.423961968 | 198.067262177 |
| H | -28.012793621 | -39.830159595 | 201.787512352 |
| H | -26.986548041 | -37.969925865 | 199.677666630 |
| H | -24.093333617 | -31.890986784 | 199.068769353 |
| H | -25.203915458 | -31.225892880 | 198.191932432 |
| H | -27.156881072 | -30.844608207 | 198.295828483 |
| H | -26.590602733 | -29.505230589 | 198.787196807 |
| H | -26.716654828 | -39.110061782 | 206.043916895 |
| H | -26.540334109 | -38.114271783 | 204.847936839 |
| H | -25.708442943 | -45.765889100 | 202.100946856 |
| H | -22.852297175 | -30.455885383 | 207.592349881 |

W1-1

|    |               |               |               |
|----|---------------|---------------|---------------|
| Mn | -24.850829000 | -35.538721000 | 203.959082000 |
| Mn | -27.327043000 | -35.214529000 | 205.229578000 |
| Mn | -27.304553000 | -33.333585000 | 203.160207000 |
| Mn | -27.570497000 | -33.143092000 | 200.424754000 |
| Ca | -27.880026000 | -36.701539000 | 202.201780000 |
| O  | -26.422978000 | -36.505907000 | 204.219140000 |
| O  | -28.342793000 | -34.718670000 | 203.805439000 |
| O  | -25.980371000 | -34.060810000 | 204.490517000 |
| O  | -28.491936000 | -32.603258000 | 202.003303000 |
| O  | -26.746428000 | -34.288106000 | 201.687700000 |
| O  | -28.540519000 | -31.702182000 | 199.438329000 |
| O  | -26.595456000 | -33.691334000 | 198.965567000 |
| O  | -27.642540000 | -37.253325000 | 199.881845000 |
| O  | -28.012596000 | -39.113741000 | 202.471078000 |
| H  | -30.478685000 | -26.842647000 | 200.176468000 |
| C  | -30.241434000 | -27.113395000 | 201.222163000 |
| H  | -30.724377000 | -26.361921000 | 201.871645000 |
| C  | -28.722919000 | -27.243321000 | 201.411337000 |
| C  | -28.102973000 | -28.363530000 | 200.562036000 |
| O  | -28.816527000 | -29.432873000 | 200.432150000 |
| O  | -26.954079000 | -28.201959000 | 200.058981000 |
| C  | -32.924381000 | -41.850903000 | 196.489835000 |
| C  | -31.502897000 | -41.618528000 | 195.942927000 |
| C  | -30.511382000 | -41.421047000 | 197.078801000 |
| C  | -29.913522000 | -42.526795000 | 197.721845000 |
| C  | -30.221776000 | -40.133428000 | 197.584497000 |
| C  | -29.053373000 | -42.365333000 | 198.822063000 |
| C  | -29.363174000 | -39.952182000 | 198.681591000 |
| C  | -28.772992000 | -41.068512000 | 199.306185000 |
| O  | -27.905658000 | -40.854862000 | 200.362608000 |
| H  | -33.785375000 | -32.318033000 | 197.913160000 |
| C  | -32.844739000 | -31.791421000 | 197.688621000 |
| C  | -31.829810000 | -32.791200000 | 197.169724000 |
| O  | -31.147285000 | -32.603885000 | 196.138977000 |
| H  | -32.479594000 | -31.312397000 | 198.615002000 |
| N  | -31.736832000 | -33.938793000 | 197.894342000 |
| C  | -30.825021000 | -35.049750000 | 197.612822000 |
| C  | -31.318046000 | -35.992647000 | 196.476196000 |
| O  | -31.223506000 | -37.228461000 | 196.560810000 |
| C  | -30.595060000 | -35.848546000 | 198.904746000 |
| C  | -29.781132000 | -35.193686000 | 200.019388000 |
| O  | -29.855272000 | -35.666521000 | 201.191270000 |
| O  | -28.985962000 | -34.252942000 | 199.658010000 |
| N  | -31.798392000 | -35.340265000 | 195.389294000 |
| C  | -31.935591000 | -35.967610000 | 194.072818000 |

|   |               |               |               |
|---|---------------|---------------|---------------|
| H | -31.190723000 | -35.442655000 | 193.449430000 |
| H | -21.516057000 | -41.187717000 | 202.032944000 |
| C | -22.352883000 | -41.458334000 | 202.717393000 |
| C | -22.777128000 | -42.908150000 | 202.607513000 |
| O | -23.550736000 | -43.426748000 | 203.433116000 |
| C | -23.551648000 | -40.505289000 | 202.467597000 |
| C | -23.063771000 | -39.047147000 | 202.388980000 |
| C | -24.144637000 | -37.978984000 | 202.504178000 |
| O | -25.215972000 | -38.008992000 | 201.853298000 |
| O | -23.820351000 | -37.012982000 | 203.320901000 |
| N | -22.263570000 | -43.591564000 | 201.544034000 |
| C | -22.629343000 | -44.962152000 | 201.252064000 |
| H | -21.726399000 | -45.520631000 | 200.924622000 |
| C | -23.739028000 | -45.094186000 | 200.182905000 |
| C | -24.992878000 | -44.410399000 | 200.611452000 |
| C | -25.517984000 | -43.171602000 | 200.287784000 |
| N | -25.827232000 | -44.900245000 | 201.606581000 |
| C | -26.799658000 | -43.984640000 | 201.856478000 |
| N | -26.635735000 | -42.926368000 | 201.065206000 |
| H | -19.262626000 | -31.517296000 | 202.779918000 |
| C | -20.112713000 | -31.328696000 | 202.090236000 |
| C | -21.154375000 | -30.546691000 | 202.874025000 |
| O | -21.421226000 | -30.807586000 | 204.067682000 |
| C | -20.720090000 | -32.620520000 | 201.483228000 |
| C | -21.589022000 | -33.374188000 | 202.435455000 |
| C | -22.935145000 | -33.697936000 | 202.409679000 |
| N | -21.123181000 | -33.855751000 | 203.650877000 |
| C | -22.138096000 | -34.439113000 | 204.322080000 |
| N | -23.253591000 | -34.361699000 | 203.585764000 |
| N | -21.810172000 | -29.589753000 | 202.172610000 |
| C | -22.896307000 | -28.815018000 | 202.759172000 |
| H | -22.557559000 | -28.453985000 | 203.752879000 |
| C | -24.181969000 | -29.643224000 | 202.951034000 |
| C | -24.721635000 | -30.211266000 | 201.640811000 |
| C | -25.721152000 | -31.340420000 | 201.776846000 |
| O | -25.990795000 | -31.831080000 | 202.923172000 |
| O | -26.217797000 | -31.754224000 | 200.673496000 |
| H | -24.817594000 | -28.957600000 | 209.210079000 |
| C | -25.289739000 | -29.704836000 | 209.874338000 |
| H | -25.215628000 | -29.314217000 | 210.902923000 |
| C | -24.611803000 | -31.085407000 | 209.715163000 |
| C | -24.550034000 | -31.566844000 | 208.292585000 |
| C | -25.335909000 | -32.450377000 | 207.571029000 |
| N | -23.592836000 | -31.118816000 | 207.383432000 |
| C | -23.774453000 | -31.696055000 | 206.176866000 |
| N | -24.837540000 | -32.502887000 | 206.278850000 |
| H | -24.708982000 | -37.374837000 | 210.156822000 |
| C | -25.333665000 | -37.110845000 | 209.273416000 |
| C | -26.302473000 | -38.222894000 | 208.875613000 |
| O | -26.046800000 | -39.056691000 | 207.985493000 |
| C | -24.383983000 | -36.717093000 | 208.143381000 |
| C | -24.985763000 | -36.040734000 | 206.917474000 |
| O | -26.235541000 | -35.741315000 | 206.897545000 |
| O | -24.168314000 | -35.811795000 | 205.969429000 |
| N | -27.489514000 | -38.237843000 | 209.552581000 |
| C | -28.420988000 | -39.357107000 | 209.469749000 |
| C | -29.300779000 | -39.451123000 | 208.214258000 |
| O | -29.916172000 | -40.502832000 | 207.966322000 |
| N | -29.379190000 | -38.333504000 | 207.459037000 |
| C | -30.065427000 | -38.289455000 | 206.171375000 |
| C | -29.361099000 | -37.276448000 | 205.260656000 |
| O | -29.557924000 | -37.291533000 | 204.033910000 |
| O | -28.611966000 | -36.430329000 | 205.918742000 |
| O | -25.399441000 | -37.757911000 | 197.332805000 |
| O | -27.439582000 | -35.857044000 | 197.676825000 |
| O | -25.847598000 | -29.684241000 | 198.165402000 |
| O | -24.579182000 | -32.013220000 | 198.214036000 |
| O | -29.737283000 | -30.348284000 | 202.776730000 |
| O | -25.774131000 | -39.323040000 | 199.596783000 |
| O | -26.796005000 | -39.050366000 | 205.059734000 |
| H | -30.321135000 | -30.625770000 | 209.001015000 |
| C | -30.997751000 | -31.051073000 | 208.236198000 |
| H | -31.843803000 | -31.521735000 | 208.767319000 |

|   |               |               |               |
|---|---------------|---------------|---------------|
| C | -30.270489000 | -32.094271000 | 207.374478000 |
| C | -28.973904000 | -31.547946000 | 206.744807000 |
| C | -28.297489000 | -32.555548000 | 205.837869000 |
| O | -28.056517000 | -33.724779000 | 206.321691000 |
| O | -27.998989000 | -32.180647000 | 204.657289000 |
| H | -36.653915000 | -31.797501000 | 206.872466000 |
| C | -36.971479000 | -32.276075000 | 205.926511000 |
| C | -35.751450000 | -32.769377000 | 205.122133000 |
| C | -34.808272000 | -33.662584000 | 205.952148000 |
| C | -33.718117000 | -34.395802000 | 205.158825000 |
| N | -32.735670000 | -33.476569000 | 204.560923000 |
| C | -31.797261000 | -33.850676000 | 203.660710000 |
| N | -31.608785000 | -35.153110000 | 203.388394000 |
| N | -31.088556000 | -32.935146000 | 202.985172000 |
| O | -27.565945000 | -29.292181000 | 204.158125000 |
| H | -32.931564000 | -42.724536000 | 197.169270000 |
| H | -33.248281000 | -40.978116000 | 197.087943000 |
| H | -33.700323000 | -42.030393000 | 195.723193000 |
| H | -31.494670000 | -40.730824000 | 195.281988000 |
| H | -31.194855000 | -42.481766000 | 195.321370000 |
| H | -30.122342000 | -43.542231000 | 197.356313000 |
| H | -28.595753000 | -43.239984000 | 199.298913000 |
| H | -29.125651000 | -38.948659000 | 199.058450000 |
| H | -30.666419000 | -39.246142000 | 197.116492000 |
| H | -27.452299000 | -41.776691000 | 200.718509000 |
| H | -25.166547000 | -42.449626000 | 199.547820000 |
| H | -27.593662000 | -44.124405000 | 202.591753000 |
| H | -28.775021000 | -37.536430000 | 207.676133000 |
| H | -27.643736000 | -37.537828000 | 210.276492000 |
| H | -21.530309000 | -29.403600000 | 201.211882000 |
| H | -21.676098000 | -43.090610000 | 200.880155000 |
| H | -22.967800000 | -45.416434000 | 202.199878000 |
| H | -23.917506000 | -46.169617000 | 199.991535000 |
| H | -23.398533000 | -44.648651000 | 199.231135000 |
| H | -22.547518000 | -38.875307000 | 201.422827000 |
| H | -24.072447000 | -40.784437000 | 201.532289000 |
| H | -21.979142000 | -41.301114000 | 203.746835000 |
| H | -22.321244000 | -38.850061000 | 203.181599000 |
| H | -24.287810000 | -40.623671000 | 203.283727000 |
| H | -26.358599000 | -29.761434000 | 209.601674000 |
| H | -26.193363000 | -33.056371000 | 207.865389000 |
| H | -23.137450000 | -31.533776000 | 205.299998000 |
| H | -23.688026000 | -33.529891000 | 201.637125000 |
| H | -22.059475000 | -34.924045000 | 205.294904000 |
| H | -19.698358000 | -30.721146000 | 201.265072000 |
| H | -23.075776000 | -27.939480000 | 202.112919000 |
| H | -29.859327000 | -34.628574000 | 197.271893000 |
| H | -32.393815000 | -34.072717000 | 198.662169000 |
| H | -33.022786000 | -31.017704000 | 196.927351000 |
| H | -31.649455000 | -34.322463000 | 195.384004000 |
| H | -30.744711000 | -28.075180000 | 201.422744000 |
| H | -19.903183000 | -33.266363000 | 201.109531000 |
| H | -21.335752000 | -32.356674000 | 200.605216000 |
| H | -25.921750000 | -36.228219000 | 209.590327000 |
| H | -29.962512000 | -39.278555000 | 205.687672000 |
| C | -31.560132000 | -37.939809000 | 206.305622000 |
| H | -32.046347000 | -37.956765000 | 205.314183000 |
| H | -32.059190000 | -38.686523000 | 206.945639000 |
| H | -31.686648000 | -36.942536000 | 206.764510000 |
| H | -29.095308000 | -39.310145000 | 210.341854000 |
| H | -27.858742000 | -40.306731000 | 209.536505000 |
| H | -23.599889000 | -36.036644000 | 208.524734000 |
| H | -23.852169000 | -37.608332000 | 207.762189000 |
| H | -30.028237000 | -36.762774000 | 198.646651000 |
| H | -31.551123000 | -36.204380000 | 199.330643000 |
| H | -31.384801000 | -30.214564000 | 207.626323000 |
| H | -30.021305000 | -32.985596000 | 207.979661000 |
| H | -28.251808000 | -31.288917000 | 207.545493000 |
| H | -30.940640000 | -32.453273000 | 206.567664000 |
| H | -29.151501000 | -30.631737000 | 206.155053000 |
| H | -28.197085000 | -26.300923000 | 201.177771000 |
| H | -28.475298000 | -27.493130000 | 202.462835000 |
| H | -25.151972000 | -31.845612000 | 210.306802000 |

|   |               |               |               |
|---|---------------|---------------|---------------|
| H | -23.581743000 | -31.050277000 | 210.118265000 |
| H | -25.264544000 | -33.103899000 | 205.490723000 |
| H | -37.548238000 | -31.526089000 | 205.357493000 |
| H | -35.193576000 | -31.895980000 | 204.728616000 |
| H | -35.401890000 | -34.447793000 | 206.458585000 |
| H | -33.192877000 | -35.097207000 | 205.837854000 |
| H | -37.645221000 | -33.113648000 | 206.184703000 |
| H | -36.096291000 | -33.334747000 | 204.233188000 |
| H | -34.339367000 | -33.069660000 | 206.763902000 |
| H | -32.846630000 | -32.478835000 | 204.728230000 |
| H | -34.182169000 | -34.996349000 | 204.351011000 |
| H | -31.198865000 | -31.930505000 | 203.147120000 |
| H | -31.903486000 | -35.875387000 | 204.037654000 |
| H | -30.177715000 | -33.175867000 | 202.551284000 |
| H | -30.890860000 | -35.416515000 | 202.697687000 |
| H | -23.963007000 | -30.471360000 | 203.644560000 |
| H | -25.207391000 | -29.435023000 | 201.019646000 |
| H | -24.954755000 | -29.017382000 | 203.433559000 |
| H | -23.895548000 | -30.621745000 | 201.024803000 |
| H | -20.180029000 | -33.729782000 | 204.015517000 |
| H | -25.833964000 | -33.080849000 | 198.718905000 |
| H | -28.505459000 | -30.721426000 | 199.841088000 |
| H | -29.634095000 | -29.892407000 | 201.892685000 |
| H | -29.193558000 | -31.169073000 | 202.587393000 |
| H | -27.102458000 | -30.146897000 | 204.256746000 |
| H | -28.406502000 | -29.590392000 | 203.708609000 |
| H | -32.948870000 | -35.830717000 | 193.657963000 |
| H | -31.697568000 | -37.039780000 | 194.143908000 |
| H | -26.509059000 | -39.957066000 | 199.829307000 |
| H | -25.468205000 | -38.954570000 | 200.480015000 |
| H | -27.656902000 | -39.483583000 | 203.312295000 |
| H | -27.636085000 | -36.673926000 | 199.039204000 |
| H | -26.637676000 | -36.386912000 | 197.424819000 |
| H | -27.089600000 | -35.000442000 | 198.080632000 |
| H | -25.573531000 | -38.308525000 | 196.546479000 |
| H | -25.516064000 | -38.382934000 | 198.099482000 |
| H | -28.002063000 | -39.816465000 | 201.770160000 |
| H | -27.001704000 | -37.979662000 | 199.670689000 |
| H | -23.958639000 | -31.998418000 | 198.964752000 |
| H | -25.053764000 | -31.119324000 | 198.272848000 |
| H | -25.353127000 | -28.968295000 | 197.725318000 |
| H | -26.322852000 | -29.224732000 | 198.937017000 |
| H | -26.709380000 | -39.117601000 | 206.035796000 |
| H | -26.539393000 | -38.109380000 | 204.848662000 |
| H | -25.705297000 | -45.779129000 | 202.107270000 |
| H | -22.841840000 | -30.461365000 | 207.595650000 |
| C | -28.558542000 | -31.658966000 | 197.999668000 |
| H | -27.591143000 | -31.302954000 | 197.603398000 |
| H | -28.769723000 | -32.674209000 | 197.635037000 |
| H | -29.370843000 | -30.982708000 | 197.678344000 |

w1-1d

|    |               |               |               |
|----|---------------|---------------|---------------|
| Mn | -24.866229000 | -35.544611000 | 203.960964000 |
| Mn | -27.323336000 | -35.201149000 | 205.252133000 |
| Mn | -27.298803000 | -33.292670000 | 203.188829000 |
| Mn | -27.836451000 | -32.909624000 | 200.466469000 |
| Ca | -27.961190000 | -36.566964000 | 202.219993000 |
| O  | -26.449347000 | -36.495767000 | 204.203911000 |
| O  | -28.357626000 | -34.669002000 | 203.878109000 |
| O  | -25.962352000 | -34.071059000 | 204.515272000 |
| O  | -28.569046000 | -32.490425000 | 202.182267000 |
| O  | -26.863546000 | -34.208118000 | 201.703769000 |
| O  | -28.846227000 | -31.553344000 | 199.785602000 |
| O  | -26.882604000 | -33.334908000 | 198.913934000 |
| O  | -27.645571000 | -37.108148000 | 199.898750000 |
| O  | -28.075619000 | -39.002717000 | 202.482355000 |
| H  | -30.805970000 | -27.144847000 | 200.271574000 |
| C  | -30.241434000 | -27.113395000 | 201.222163000 |
| H  | -30.724377000 | -26.361921000 | 201.871645000 |
| C  | -28.766717000 | -26.741132000 | 200.961212000 |
| C  | -28.093062000 | -27.622884000 | 199.886225000 |
| O  | -27.377561000 | -28.608809000 | 200.255212000 |

|   |               |               |               |
|---|---------------|---------------|---------------|
| O | -28.297971000 | -27.293337000 | 198.664573000 |
| C | -32.924381000 | -41.850903000 | 196.489835000 |
| C | -31.495460000 | -41.656061000 | 195.946990000 |
| C | -30.504516000 | -41.420430000 | 197.077365000 |
| C | -29.919751000 | -42.501443000 | 197.772378000 |
| C | -30.193378000 | -40.113991000 | 197.518481000 |
| C | -29.049841000 | -42.297790000 | 198.858369000 |
| C | -29.323019000 | -39.890332000 | 198.598520000 |
| C | -28.743136000 | -40.982703000 | 199.273784000 |
| O | -27.862415000 | -40.727914000 | 200.309659000 |
| H | -33.785375000 | -32.318033000 | 197.913160000 |
| C | -32.844739000 | -31.791421000 | 197.688621000 |
| C | -31.860991000 | -32.803863000 | 197.138823000 |
| O | -31.224855000 | -32.633727000 | 196.074820000 |
| H | -32.461720000 | -31.341330000 | 198.621927000 |
| N | -31.755105000 | -33.945343000 | 197.868660000 |
| C | -30.825021000 | -35.049750000 | 197.612822000 |
| C | -31.267896000 | -35.991999000 | 196.458528000 |
| O | -31.081275000 | -37.219430000 | 196.509823000 |
| C | -30.628923000 | -35.843917000 | 198.910420000 |
| C | -29.898281000 | -35.138454000 | 200.053860000 |
| O | -29.974387000 | -35.639239000 | 201.216904000 |
| O | -29.195861000 | -34.122670000 | 199.726659000 |
| N | -31.815430000 | -35.352142000 | 195.394375000 |
| C | -31.935592000 | -35.967610000 | 194.072818000 |
| H | -31.190723000 | -35.442655000 | 193.449430000 |
| H | -21.516057000 | -41.187717000 | 202.032944000 |
| C | -22.352883000 | -41.458334000 | 202.717393000 |
| C | -22.766399000 | -42.911272000 | 202.616542000 |
| O | -23.528007000 | -43.434616000 | 203.450535000 |
| C | -23.553664000 | -40.508721000 | 202.461802000 |
| C | -23.066807000 | -39.050481000 | 202.379851000 |
| C | -24.149503000 | -37.981510000 | 202.491565000 |
| O | -25.213933000 | -38.009932000 | 201.829637000 |
| O | -23.832946000 | -37.021159000 | 203.314872000 |
| N | -22.253843000 | -43.595073000 | 201.552166000 |
| C | -22.629343000 | -44.962152000 | 201.252064000 |
| H | -21.726399000 | -45.520631000 | 200.924622000 |
| C | -23.743356000 | -45.072615000 | 200.184187000 |
| C | -24.974470000 | -44.341763000 | 200.604976000 |
| C | -25.470811000 | -43.099467000 | 200.248032000 |
| N | -25.807810000 | -44.775217000 | 201.626796000 |
| C | -26.749374000 | -43.823245000 | 201.860257000 |
| N | -26.569435000 | -42.796255000 | 201.032293000 |
| H | -19.262626000 | -31.517296000 | 202.779918000 |
| C | -20.112713000 | -31.328696000 | 202.090236000 |
| C | -21.133643000 | -30.521175000 | 202.875616000 |
| O | -21.365572000 | -30.749463000 | 204.084117000 |
| C | -20.742940000 | -32.612961000 | 201.495401000 |
| C | -21.607296000 | -33.359975000 | 202.456415000 |
| C | -22.953910000 | -33.680817000 | 202.436083000 |
| N | -21.132250000 | -33.860066000 | 203.661307000 |
| C | -22.143914000 | -34.455876000 | 204.328934000 |
| N | -23.263220000 | -34.366382000 | 203.601465000 |
| N | -21.801249000 | -29.576749000 | 202.168909000 |
| C | -22.896308000 | -28.815017000 | 202.759172000 |
| H | -22.557559000 | -28.453985000 | 203.752879000 |
| C | -24.154032000 | -29.673128000 | 202.971669000 |
| C | -24.794049000 | -30.139918000 | 201.670146000 |
| C | -25.792725000 | -31.267108000 | 201.820242000 |
| O | -25.948663000 | -31.850425000 | 202.945072000 |
| O | -26.414037000 | -31.576336000 | 200.751892000 |
| H | -24.843643000 | -28.944718000 | 209.206694000 |
| C | -25.289739000 | -29.704836000 | 209.874338000 |
| H | -25.215628000 | -29.314217000 | 210.902923000 |
| C | -24.581089000 | -31.068292000 | 209.702946000 |
| C | -24.532712000 | -31.550066000 | 208.279708000 |
| C | -25.293850000 | -32.471439000 | 207.579481000 |
| N | -23.618576000 | -31.062514000 | 207.346347000 |
| C | -23.805096000 | -31.652759000 | 206.146341000 |
| N | -24.826442000 | -32.506349000 | 206.275155000 |
| H | -24.708982000 | -37.374837000 | 210.156822000 |
| C | -25.333666000 | -37.110844000 | 209.273416000 |

|   |               |               |               |
|---|---------------|---------------|---------------|
| C | -26.297914000 | -38.228556000 | 208.879886000 |
| O | -26.035297000 | -39.074111000 | 208.004199000 |
| C | -24.372075000 | -36.732359000 | 208.148126000 |
| C | -24.972131000 | -36.070035000 | 206.914483000 |
| O | -26.217608000 | -35.762954000 | 206.905504000 |
| O | -24.158203000 | -35.860418000 | 205.959023000 |
| N | -27.490123000 | -38.237921000 | 209.549936000 |
| C | -28.420988000 | -39.357107000 | 209.469749000 |
| C | -29.313701000 | -39.446349000 | 208.222521000 |
| O | -29.950101000 | -40.489889000 | 207.989271000 |
| N | -29.380752000 | -38.331595000 | 207.464494000 |
| C | -30.096590000 | -38.261834000 | 206.193598000 |
| C | -29.408449000 | -37.227368000 | 205.290325000 |
| O | -29.666661000 | -37.189070000 | 204.074046000 |
| O | -28.603683000 | -36.435395000 | 205.944255000 |
| O | -25.399689000 | -37.479329000 | 197.325472000 |
| O | -27.496466000 | -35.618861000 | 197.755389000 |
| O | -27.114195000 | -28.800633000 | 196.876752000 |
| O | -25.759058000 | -30.756702000 | 198.211951000 |
| O | -28.416428000 | -29.707771000 | 202.462946000 |
| O | -25.753922000 | -39.173002000 | 199.505518000 |
| O | -26.700467000 | -39.042860000 | 204.962136000 |
| H | -30.371831000 | -30.543524000 | 208.994127000 |
| C | -30.997751000 | -31.051073000 | 208.236198000 |
| H | -31.843803000 | -31.521735000 | 208.767319000 |
| C | -30.194915000 | -32.115836000 | 207.476912000 |
| C | -28.889851000 | -31.559850000 | 206.878039000 |
| C | -28.217231000 | -32.548259000 | 205.945751000 |
| O | -28.017466000 | -33.740914000 | 206.397342000 |
| O | -27.888248000 | -32.139984000 | 204.789756000 |
| H | -36.729491000 | -31.829921000 | 206.909907000 |
| C | -36.971479000 | -32.276075000 | 205.926511000 |
| C | -35.687837000 | -32.673289000 | 205.169583000 |
| C | -34.750525000 | -33.573735000 | 205.997347000 |
| C | -33.556965000 | -34.163997000 | 205.232352000 |
| N | -32.622239000 | -33.126833000 | 204.771900000 |
| C | -31.632617000 | -33.325818000 | 203.864367000 |
| N | -31.357681000 | -34.574136000 | 203.446943000 |
| N | -30.966515000 | -32.291114000 | 203.341538000 |
| O | -27.056519000 | -29.319368000 | 204.734859000 |
| H | -32.952216000 | -42.708227000 | 197.189264000 |
| H | -33.234514000 | -40.958530000 | 197.066105000 |
| H | -33.700323000 | -42.030393000 | 195.723193000 |
| H | -31.473452000 | -40.796438000 | 195.250225000 |
| H | -31.192472000 | -42.546998000 | 195.362846000 |
| H | -30.145102000 | -43.530933000 | 197.459306000 |
| H | -28.603200000 | -43.154374000 | 199.376550000 |
| H | -29.070819000 | -38.872201000 | 198.924079000 |
| H | -30.628652000 | -39.243099000 | 197.013070000 |
| H | -27.393242000 | -41.629942000 | 200.670071000 |
| H | -25.110124000 | -42.412851000 | 199.479403000 |
| H | -27.533941000 | -43.915447000 | 202.613038000 |
| H | -28.758273000 | -37.544003000 | 207.668030000 |
| H | -27.655735000 | -37.523701000 | 210.257059000 |
| H | -21.580711000 | -29.450042000 | 201.183242000 |
| H | -21.685488000 | -43.086917000 | 200.877085000 |
| H | -22.970466000 | -45.418573000 | 202.197862000 |
| H | -23.955693000 | -46.143972000 | 200.004215000 |
| H | -23.390368000 | -44.647806000 | 199.227457000 |
| H | -22.548902000 | -38.881860000 | 201.414037000 |
| H | -24.073223000 | -40.791385000 | 201.526965000 |
| H | -21.980841000 | -41.293026000 | 203.746270000 |
| H | -22.325874000 | -38.851292000 | 203.173537000 |
| H | -24.291524000 | -40.624642000 | 203.276773000 |
| H | -26.359658000 | -29.786657000 | 209.612092000 |
| H | -26.116426000 | -33.114287000 | 207.894675000 |
| H | -23.197229000 | -31.466757000 | 205.254754000 |
| H | -23.713554000 | -33.485690000 | 201.676946000 |
| H | -22.060417000 | -34.956452000 | 205.293257000 |
| H | -19.694923000 | -30.732858000 | 201.257777000 |
| H | -23.096680000 | -27.941854000 | 202.115654000 |
| H | -29.849438000 | -34.621084000 | 197.306808000 |
| H | -32.353734000 | -34.039717000 | 198.688069000 |



|   |               |               |               |
|---|---------------|---------------|---------------|
| H | -33.021877000 | -31.000727000 | 196.945278000 |
| H | -31.708924000 | -34.327406000 | 195.399034000 |
| H | -30.305632000 | -28.107613000 | 201.698929000 |
| H | -19.938247000 | -33.268211000 | 201.110740000 |
| H | -21.369137000 | -32.341800000 | 200.627303000 |
| H | -25.921400000 | -36.224525000 | 209.578980000 |
| H | -30.007710000 | -39.240823000 | 205.686143000 |
| C | -31.586455000 | -37.911265000 | 206.369552000 |
| H | -32.087897000 | -37.878149000 | 205.386624000 |
| H | -32.078605000 | -38.679371000 | 206.989451000 |
| H | -31.696118000 | -36.931317000 | 206.868674000 |
| H | -29.090830000 | -39.310936000 | 210.345706000 |
| H | -27.858742000 | -40.306731000 | 209.536505000 |
| H | -23.592440000 | -36.046235000 | 208.528739000 |
| H | -23.837767000 | -37.628693000 | 207.783391000 |
| H | -30.017646000 | -36.735729000 | 198.682070000 |
| H | -31.592083000 | -36.231705000 | 199.291164000 |
| H | -31.393974000 | -30.275081000 | 207.555746000 |
| H | -29.948966000 | -32.964066000 | 208.141990000 |
| H | -28.175262000 | -31.318984000 | 207.690698000 |
| H | -30.812621000 | -32.543331000 | 206.662834000 |
| H | -29.058564000 | -30.628951000 | 206.308860000 |
| H | -28.705151000 | -25.691582000 | 200.616078000 |
| H | -28.190714000 | -26.826517000 | 201.901055000 |
| H | -25.091963000 | -31.841356000 | 210.303984000 |
| H | -23.545408000 | -31.007330000 | 210.088679000 |
| H | -25.255426000 | -33.125169000 | 205.490650000 |
| H | -37.548238000 | -31.526089000 | 205.357493000 |
| H | -35.147677000 | -31.756681000 | 204.858932000 |
| H | -35.323447000 | -34.433077000 | 206.395683000 |
| H | -33.023534000 | -34.878991000 | 205.891747000 |
| H | -37.619223000 | -33.153733000 | 206.106551000 |
| H | -35.956604000 | -33.198076000 | 204.230884000 |
| H | -34.381719000 | -33.020958000 | 206.885891000 |
| H | -32.750529000 | -32.179911000 | 205.121085000 |
| H | -33.916632000 | -34.729190000 | 204.350084000 |
| H | -31.260444000 | -31.339256000 | 203.542092000 |
| H | -31.539079000 | -35.374377000 | 204.047003000 |
| H | -30.038825000 | -32.421148000 | 202.840030000 |
| H | -30.624058000 | -34.735652000 | 202.738796000 |
| H | -23.866099000 | -30.556857000 | 203.564096000 |
| H | -25.335177000 | -29.324482000 | 201.151645000 |
| H | -24.899407000 | -29.127676000 | 203.579684000 |
| H | -24.031842000 | -30.508981000 | 200.953664000 |
| H | -20.186465000 | -33.740639000 | 204.020399000 |
| H | -26.468452000 | -32.522936000 | 198.515431000 |
| H | -28.024421000 | -29.342016000 | 201.606700000 |
| H | -28.505179000 | -30.683385000 | 202.303065000 |
| H | -26.925706000 | -30.273284000 | 204.905608000 |
| H | -27.544342000 | -29.383687000 | 203.851175000 |
| H | -32.946826000 | -35.830575000 | 193.652817000 |
| H | -31.696557000 | -37.040179000 | 194.138590000 |
| H | -26.491691000 | -39.808383000 | 199.719978000 |
| H | -25.442892000 | -38.850844000 | 200.406766000 |
| H | -27.637820000 | -39.350591000 | 203.297543000 |
| H | -27.653824000 | -36.493319000 | 199.079124000 |
| H | -26.659863000 | -36.077096000 | 197.487040000 |
| H | -27.228452000 | -34.711588000 | 198.128060000 |
| H | -25.635539000 | -37.982669000 | 196.523806000 |
| H | -25.515752000 | -38.135789000 | 198.065460000 |
| H | -27.979071000 | -39.669237000 | 201.756101000 |
| H | -26.990550000 | -37.812274000 | 199.665402000 |
| H | -26.087946000 | -30.633257000 | 199.132893000 |
| H | -26.259659000 | -30.052115000 | 197.699114000 |
| H | -26.465279000 | -28.175019000 | 196.504090000 |
| H | -27.576733000 | -28.253471000 | 197.621671000 |
| H | -26.723221000 | -39.095673000 | 205.940957000 |
| H | -26.499477000 | -38.079187000 | 204.768145000 |
| H | -25.696618000 | -45.634820000 | 202.161951000 |
| H | -22.894119000 | -30.369798000 | 207.536162000 |
| C | -29.101896000 | -31.407308000 | 198.407745000 |
| H | -28.254552000 | -30.925711000 | 197.882698000 |
| H | -29.308304000 | -32.382452000 | 197.925865000 |

|   |               |               |               |
|---|---------------|---------------|---------------|
| H | -29.991845000 | -30.756274000 | 198.291504000 |
|---|---------------|---------------|---------------|

W2-1

|    |               |               |               |
|----|---------------|---------------|---------------|
| Mn | -24.825047000 | -35.557118000 | 203.969001000 |
| Mn | -27.309389000 | -35.236247000 | 205.237716000 |
| Mn | -27.289431000 | -33.352726000 | 203.188341000 |
| Mn | -27.589614000 | -33.144880000 | 200.478632000 |
| Ca | -27.883485000 | -36.742393000 | 202.210649000 |
| O  | -26.408800000 | -36.513790000 | 204.219290000 |
| O  | -28.323636000 | -34.731452000 | 203.791686000 |
| O  | -25.974416000 | -34.062845000 | 204.472698000 |
| O  | -28.485065000 | -32.618735000 | 201.974692000 |
| O  | -26.746475000 | -34.288914000 | 201.667978000 |
| O  | -28.421274000 | -31.721552000 | 199.346761000 |
| O  | -26.376360000 | -33.793181000 | 198.958362000 |
| O  | -27.596797000 | -37.146092000 | 199.871309000 |
| O  | -27.953303000 | -39.139471000 | 202.429259000 |
| H  | -30.388481000 | -26.773391000 | 200.179757000 |
| C  | -30.241434000 | -27.113395000 | 201.222163000 |
| H  | -30.724377000 | -26.361921000 | 201.871645000 |
| C  | -28.754983000 | -27.401691000 | 201.477842000 |
| C  | -28.215342000 | -28.548856000 | 200.608611000 |
| O  | -28.979215000 | -29.603484000 | 200.519484000 |
| O  | -27.093392000 | -28.439152000 | 200.045405000 |
| C  | -32.924381000 | -41.850903000 | 196.489835000 |
| C  | -31.513847000 | -41.587032000 | 195.930007000 |
| C  | -30.511166000 | -41.377359000 | 197.052886000 |
| C  | -29.921641000 | -42.477632000 | 197.713273000 |
| C  | -30.193575000 | -40.084001000 | 197.523957000 |
| C  | -29.040627000 | -42.304902000 | 198.794307000 |
| C  | -29.312664000 | -39.891737000 | 198.601533000 |
| C  | -28.727766000 | -41.002153000 | 199.241799000 |
| O  | -27.831532000 | -40.781560000 | 200.272403000 |
| H  | -33.785375000 | -32.318034000 | 197.913159000 |
| C  | -32.844739000 | -31.791422000 | 197.688620000 |
| C  | -31.617855000 | -32.675830000 | 197.736566000 |
| O  | -30.462613000 | -32.195443000 | 197.695746000 |
| H  | -32.713365000 | -30.952048000 | 198.391671000 |
| N  | -31.850337000 | -34.018034000 | 197.755363000 |
| C  | -30.825021000 | -35.049751000 | 197.612821000 |
| C  | -31.097756000 | -35.977024000 | 196.404856000 |
| O  | -30.594144000 | -37.107110000 | 196.340262000 |
| C  | -30.605246000 | -35.839351000 | 198.916260000 |
| C  | -29.774947000 | -35.186623000 | 200.021856000 |
| O  | -29.846736000 | -35.629341000 | 201.199712000 |
| O  | -28.947546000 | -34.257549000 | 199.654578000 |
| N  | -31.861062000 | -35.424455000 | 195.425818000 |
| C  | -31.935591000 | -35.967611000 | 194.072817000 |
| H  | -31.190723000 | -35.442656000 | 193.449429000 |
| H  | -21.516057000 | -41.187718000 | 202.032943000 |
| C  | -22.352883000 | -41.458335000 | 202.717392000 |
| C  | -22.789026000 | -42.903944000 | 202.599064000 |
| O  | -23.587238000 | -43.411985000 | 203.407496000 |
| C  | -23.549045000 | -40.496550000 | 202.470284000 |
| C  | -23.051529000 | -39.042522000 | 202.336403000 |
| C  | -24.119876000 | -37.962698000 | 202.463384000 |
| O  | -25.169270000 | -37.939366000 | 201.776474000 |
| O  | -23.812570000 | -37.040563000 | 203.338456000 |
| N  | -22.259775000 | -43.593124000 | 201.547740000 |
| C  | -22.629343000 | -44.962153000 | 201.252063000 |
| H  | -21.726399000 | -45.520632000 | 200.924621000 |
| C  | -23.731762000 | -45.090479000 | 200.174446000 |
| C  | -24.975718000 | -44.375413000 | 200.578554000 |
| C  | -25.471493000 | -43.133956000 | 200.221839000 |
| N  | -25.826623000 | -44.823788000 | 201.578760000 |
| C  | -26.779826000 | -43.883324000 | 201.802786000 |
| N  | -26.587349000 | -42.847522000 | 200.987387000 |
| H  | -19.262626000 | -31.517297000 | 202.779917000 |
| C  | -20.112713000 | -31.328697000 | 202.090235000 |
| C  | -21.164833000 | -30.558518000 | 202.869530000 |
| O  | -21.455520000 | -30.845811000 | 204.051531000 |
| C  | -20.714697000 | -32.626735000 | 201.490085000 |

|   |               |               |               |
|---|---------------|---------------|---------------|
| C | -21.562900000 | -33.397198000 | 202.447606000 |
| C | -22.921212000 | -33.661691000 | 202.472053000 |
| N | -21.063569000 | -33.975263000 | 203.606235000 |
| C | -22.069009000 | -34.563183000 | 204.287231000 |
| N | -23.215745000 | -34.391487000 | 203.614842000 |
| N | -21.810555000 | -29.590801000 | 202.173145000 |
| C | -22.896307000 | -28.815019000 | 202.759171000 |
| H | -22.557559000 | -28.453986000 | 203.752878000 |
| C | -24.184314000 | -29.643929000 | 202.945255000 |
| C | -24.724250000 | -30.213936000 | 201.632625000 |
| C | -25.715953000 | -31.346713000 | 201.774673000 |
| O | -25.994467000 | -31.830587000 | 202.920043000 |
| O | -26.211219000 | -31.781933000 | 200.671684000 |
| H | -24.816339000 | -28.958279000 | 209.210347000 |
| C | -25.289739000 | -29.704836000 | 209.874338000 |
| H | -25.215628000 | -29.314217000 | 210.902923000 |
| C | -24.610314000 | -31.085163000 | 209.720286000 |
| C | -24.535796000 | -31.563193000 | 208.297845000 |
| C | -25.317090000 | -32.441770000 | 207.565829000 |
| N | -23.568292000 | -31.114582000 | 207.400261000 |
| C | -23.735817000 | -31.684973000 | 206.189806000 |
| N | -24.803058000 | -32.489999000 | 206.278739000 |
| H | -24.708982000 | -37.374838000 | 210.156821000 |
| C | -25.333665000 | -37.110846000 | 209.273415000 |
| C | -26.309358000 | -38.215124000 | 208.870190000 |
| O | -26.065112000 | -39.032565000 | 207.961204000 |
| C | -24.383737000 | -36.715806000 | 208.143816000 |
| C | -24.981849000 | -36.047431000 | 206.914161000 |
| O | -26.231678000 | -35.739961000 | 206.889287000 |
| O | -24.167519000 | -35.827012000 | 205.961603000 |
| N | -27.489292000 | -38.237573000 | 209.558010000 |
| C | -28.420988000 | -39.357108000 | 209.469748000 |
| C | -29.287934000 | -39.451234000 | 208.206449000 |
| O | -29.873528000 | -40.512306000 | 207.932361000 |
| N | -29.391030000 | -38.321612000 | 207.469040000 |
| C | -30.059725000 | -38.288018000 | 206.172584000 |
| C | -29.343927000 | -37.291373000 | 205.256689000 |
| O | -29.520970000 | -37.319252000 | 204.027768000 |
| O | -28.601318000 | -36.433424000 | 205.911970000 |
| O | -25.570466000 | -37.592197000 | 197.195229000 |
| O | -27.687363000 | -35.887605000 | 197.554537000 |
| O | -26.762780000 | -30.031193000 | 197.918900000 |
| O | -25.141077000 | -31.986258000 | 197.764952000 |
| O | -29.858563000 | -30.447227000 | 202.920034000 |
| O | -25.804517000 | -39.163556000 | 199.482060000 |
| O | -26.851483000 | -39.064340000 | 205.085748000 |
| H | -30.318865000 | -30.625099000 | 208.998071000 |
| C | -30.997751000 | -31.051074000 | 208.236197000 |
| H | -31.843803000 | -31.521736000 | 208.767318000 |
| C | -30.275559000 | -32.102583000 | 207.376813000 |
| C | -28.993256000 | -31.557860000 | 206.714242000 |
| C | -28.311247000 | -32.574760000 | 205.823771000 |
| O | -28.058864000 | -33.735331000 | 206.309560000 |
| O | -28.009434000 | -32.205768000 | 204.633980000 |
| H | -36.626620000 | -31.787400000 | 206.857600000 |
| C | -36.971479000 | -32.276075000 | 205.926511000 |
| C | -35.779111000 | -32.813077000 | 205.113808000 |
| C | -34.870697000 | -33.740351000 | 205.943888000 |
| C | -33.802105000 | -34.499500000 | 205.149013000 |
| N | -32.792048000 | -33.599730000 | 204.567034000 |
| C | -31.854000000 | -33.989944000 | 203.678439000 |
| N | -31.699282000 | -35.291502000 | 203.388029000 |
| N | -31.094340000 | -33.085922000 | 203.040126000 |
| O | -27.596825000 | -29.319412000 | 204.192598000 |
| H | -32.912045000 | -42.735182000 | 197.154941000 |
| H | -33.258246000 | -40.992531000 | 197.103182000 |
| H | -33.700323000 | -42.030393000 | 195.723193000 |
| H | -31.529491000 | -40.695941000 | 195.273835000 |
| H | -31.197178000 | -42.440431000 | 195.299276000 |
| H | -30.152092000 | -43.497580000 | 197.374613000 |
| H | -28.589638000 | -43.176329000 | 199.282940000 |
| H | -29.054816000 | -38.883266000 | 198.948482000 |
| H | -30.620857000 | -39.199425000 | 197.034976000 |

|   |               |               |               |
|---|---------------|---------------|---------------|
| H | -27.368358000 | -41.715933000 | 200.634736000 |
| H | -25.101954000 | -42.439496000 | 199.464901000 |
| H | -27.580928000 | -43.988222000 | 202.535985000 |
| H | -28.810430000 | -37.514032000 | 207.708092000 |
| H | -27.629181000 | -37.555956000 | 210.302335000 |
| H | -21.500297000 | -29.373891000 | 201.228199000 |
| H | -21.647630000 | -43.101311000 | 200.899590000 |
| H | -22.973678000 | -45.418695000 | 202.196582000 |
| H | -23.928358000 | -46.165208000 | 199.998277000 |
| H | -23.374201000 | -44.666272000 | 199.219284000 |
| H | -22.570684000 | -38.902214000 | 201.347632000 |
| H | -24.094446000 | -40.796215000 | 201.555408000 |
| H | -21.977779000 | -41.306528000 | 203.746969000 |
| H | -22.280951000 | -38.833960000 | 203.098337000 |
| H | -24.266458000 | -40.586729000 | 203.306299000 |
| H | -26.358333000 | -29.762263000 | 209.601177000 |
| H | -26.178124000 | -33.046991000 | 207.851076000 |
| H | -23.088845000 | -31.520000000 | 205.319492000 |
| H | -23.701287000 | -33.393204000 | 201.759735000 |
| H | -21.962876000 | -35.117950000 | 205.219406000 |
| H | -19.702687000 | -30.722551000 | 201.262334000 |
| H | -23.073818000 | -27.938716000 | 202.113843000 |
| H | -29.881373000 | -34.526374000 | 197.366230000 |
| H | -32.815228000 | -34.329895000 | 197.872208000 |
| H | -32.913340000 | -31.361733000 | 196.672446000 |
| H | -32.142195000 | -34.452633000 | 195.549831000 |
| H | -30.834699000 | -28.039347000 | 201.332389000 |
| H | -19.897270000 | -33.263924000 | 201.103901000 |
| H | -21.344628000 | -32.365606000 | 200.621300000 |
| H | -25.918885000 | -36.227062000 | 209.592812000 |
| H | -29.950550000 | -39.282991000 | 205.702466000 |
| C | -31.556696000 | -37.938868000 | 206.282664000 |
| H | -32.032142000 | -37.978243000 | 205.286765000 |
| H | -32.058997000 | -38.676043000 | 206.930860000 |
| H | -31.692097000 | -36.934170000 | 206.721818000 |
| H | -29.100600000 | -39.310713000 | 210.337574000 |
| H | -27.858742000 | -40.306732000 | 209.536504000 |
| H | -23.603829000 | -36.029730000 | 208.523993000 |
| H | -23.844983000 | -37.604116000 | 207.765463000 |
| H | -30.047951000 | -36.760539000 | 198.654060000 |
| H | -31.562008000 | -36.168417000 | 199.358914000 |
| H | -31.385180000 | -30.217399000 | 207.623012000 |
| H | -30.010232000 | -32.982296000 | 207.991813000 |
| H | -28.261616000 | -31.272106000 | 207.497177000 |
| H | -30.957088000 | -32.477910000 | 206.587089000 |
| H | -29.188729000 | -30.656203000 | 206.108586000 |
| H | -28.126339000 | -26.513841000 | 201.292939000 |
| H | -28.580553000 | -27.703134000 | 202.529178000 |
| H | -25.154889000 | -31.846315000 | 210.306485000 |
| H | -23.583439000 | -31.050240000 | 210.131097000 |
| H | -25.217152000 | -33.080489000 | 205.492400000 |
| H | -37.548238000 | -31.526089000 | 205.357493000 |
| H | -35.190672000 | -31.961862000 | 204.715921000 |
| H | -35.491871000 | -34.509353000 | 206.441659000 |
| H | -33.298653000 | -35.223083000 | 205.820667000 |
| H | -37.657495000 | -33.094107000 | 206.214072000 |
| H | -36.149393000 | -33.367268000 | 204.228071000 |
| H | -34.387059000 | -33.168875000 | 206.762300000 |
| H | -32.879312000 | -32.601067000 | 204.743425000 |
| H | -34.282107000 | -35.074407000 | 204.331973000 |
| H | -31.167700000 | -32.076772000 | 203.205990000 |
| H | -32.100334000 | -36.020196000 | 203.968705000 |
| H | -30.215528000 | -33.372196000 | 202.589693000 |
| H | -30.995122000 | -35.572360000 | 202.694808000 |
| H | -23.966059000 | -30.472808000 | 203.638207000 |
| H | -25.222492000 | -29.443375000 | 201.012077000 |
| H | -24.955745000 | -29.016988000 | 203.428000000 |
| H | -23.898749000 | -30.618044000 | 201.011037000 |
| H | -20.095321000 | -33.929004000 | 203.922614000 |
| H | -25.892880000 | -32.965557000 | 198.448908000 |
| H | -29.232948000 | -32.004560000 | 198.819240000 |
| H | -28.638899000 | -30.761023000 | 199.878430000 |
| H | -29.817037000 | -29.992031000 | 202.032476000 |

|   |               |               |               |
|---|---------------|---------------|---------------|
| H | -29.252033000 | -31.208144000 | 202.718474000 |
| H | -27.108069000 | -30.163332000 | 204.246376000 |
| H | -28.468493000 | -29.624601000 | 203.824769000 |
| H | -32.944404000 | -35.817478000 | 193.655528000 |
| H | -31.701267000 | -37.042722000 | 194.101747000 |
| H | -26.500704000 | -39.842679000 | 199.723375000 |
| H | -25.435272000 | -38.851797000 | 200.361026000 |
| H | -27.651860000 | -39.538737000 | 203.276811000 |
| H | -27.722194000 | -36.637903000 | 199.000844000 |
| H | -26.895585000 | -36.417195000 | 197.251591000 |
| H | -27.331690000 | -35.008134000 | 197.823327000 |
| H | -25.606425000 | -38.153413000 | 196.397782000 |
| H | -25.606728000 | -38.236151000 | 197.953409000 |
| H | -27.950210000 | -39.830162000 | 201.712863000 |
| H | -26.960209000 | -37.878194000 | 199.632090000 |
| H | -24.291704000 | -31.812633000 | 198.211286000 |
| H | -25.687834000 | -31.100593000 | 197.847509000 |
| H | -27.473061000 | -30.669140000 | 198.181502000 |
| H | -26.762423000 | -29.419748000 | 198.726712000 |
| H | -26.729060000 | -39.144159000 | 206.058265000 |
| H | -26.555453000 | -38.139162000 | 204.873945000 |
| H | -25.724636000 | -45.691790000 | 202.102618000 |
| H | -22.817619000 | -30.460077000 | 207.624038000 |
| C | -25.289289000 | -34.697642000 | 199.300563000 |
| H | -24.584781000 | -34.205786000 | 199.993307000 |
| H | -25.711850000 | -35.588459000 | 199.787522000 |
| H | -24.770386000 | -34.988633000 | 198.371039000 |

w2-1d

|    |               |               |               |
|----|---------------|---------------|---------------|
| Mn | -24.847548000 | -35.532968000 | 203.962475000 |
| Mn | -27.322635000 | -35.221337000 | 205.240892000 |
| Mn | -27.316400000 | -33.334143000 | 203.186158000 |
| Mn | -27.526106000 | -33.210798000 | 200.452869000 |
| Ca | -27.889240000 | -36.706622000 | 202.217155000 |
| O  | -26.420431000 | -36.503093000 | 204.219415000 |
| O  | -28.351453000 | -34.718720000 | 203.822643000 |
| O  | -25.985255000 | -34.058020000 | 204.499680000 |
| O  | -28.469122000 | -32.607317000 | 201.990142000 |
| O  | -26.756039000 | -34.332203000 | 201.723128000 |
| O  | -28.302990000 | -31.733073000 | 199.293284000 |
| O  | -26.479985000 | -33.909841000 | 199.071078000 |
| O  | -27.611121000 | -37.180515000 | 199.887920000 |
| O  | -27.987546000 | -39.115247000 | 202.454832000 |
| H  | -30.442316000 | -26.806721000 | 200.178115000 |
| C  | -30.241434000 | -27.113395000 | 201.222163000 |
| H  | -30.724377000 | -26.361921000 | 201.871645000 |
| C  | -28.735737000 | -27.334163000 | 201.426983000 |
| C  | -28.164642000 | -28.463540000 | 200.546971000 |
| O  | -28.884958000 | -29.538851000 | 200.448219000 |
| O  | -27.041153000 | -28.305258000 | 199.992537000 |
| C  | -32.924381000 | -41.850903000 | 196.489835000 |
| C  | -31.515058000 | -41.571634000 | 195.934099000 |
| C  | -30.515272000 | -41.367124000 | 197.060966000 |
| C  | -29.932516000 | -42.471473000 | 197.720806000 |
| C  | -30.194891000 | -40.076106000 | 197.537039000 |
| C  | -29.056922000 | -42.305109000 | 198.807347000 |
| C  | -29.319547000 | -39.889789000 | 198.620204000 |
| C  | -28.743323000 | -41.004482000 | 199.260793000 |
| O  | -27.856213000 | -40.788856000 | 200.299826000 |
| H  | -33.785375000 | -32.318034000 | 197.913159000 |
| C  | -32.844739000 | -31.791422000 | 197.688620000 |
| C  | -31.609039000 | -32.668866000 | 197.715786000 |
| O  | -30.459620000 | -32.184422000 | 197.647472000 |
| H  | -32.710466000 | -30.959860000 | 198.400813000 |
| N  | -31.843558000 | -34.012234000 | 197.748722000 |
| C  | -30.825021000 | -35.049751000 | 197.612821000 |
| C  | -31.093027000 | -35.972708000 | 196.401548000 |
| O  | -30.585145000 | -37.100937000 | 196.328834000 |
| C  | -30.627895000 | -35.844137000 | 198.915426000 |
| C  | -29.807198000 | -35.190844000 | 200.029300000 |
| O  | -29.864968000 | -35.677603000 | 201.195661000 |
| O  | -29.019136000 | -34.232622000 | 199.683281000 |

|   |               |               |               |
|---|---------------|---------------|---------------|
| N | -31.865134000 | -35.424183000 | 195.425391000 |
| C | -31.935591000 | -35.967611000 | 194.072817000 |
| H | -31.190723000 | -35.442656000 | 193.449429000 |
| H | -21.516057000 | -41.187718000 | 202.032943000 |
| C | -22.352883000 | -41.458335000 | 202.717392000 |
| C | -22.783851000 | -42.905568000 | 202.602999000 |
| O | -23.570850000 | -43.419059000 | 203.419118000 |
| C | -23.547973000 | -40.497155000 | 202.468624000 |
| C | -23.055457000 | -39.039527000 | 202.388616000 |
| C | -24.132893000 | -37.964231000 | 202.487149000 |
| O | -25.190541000 | -37.980967000 | 201.813078000 |
| O | -23.820260000 | -37.005309000 | 203.316580000 |
| N | -22.259927000 | -43.592996000 | 201.547328000 |
| C | -22.629343000 | -44.962153000 | 201.252063000 |
| H | -21.726399000 | -45.520632000 | 200.924621000 |
| C | -23.734829000 | -45.088493000 | 200.177411000 |
| C | -24.981016000 | -44.380933000 | 200.589347000 |
| C | -25.488060000 | -43.141750000 | 200.239337000 |
| N | -25.825349000 | -44.839710000 | 201.590659000 |
| C | -26.785080000 | -43.906142000 | 201.820329000 |
| N | -26.604223000 | -42.866006000 | 201.008537000 |
| H | -19.262626000 | -31.517297000 | 202.779917000 |
| C | -20.112713000 | -31.328697000 | 202.090235000 |
| C | -21.150351000 | -30.541382000 | 202.874546000 |
| O | -21.406517000 | -30.795139000 | 204.073247000 |
| C | -20.735414000 | -32.612349000 | 201.484576000 |
| C | -21.586813000 | -33.372538000 | 202.446385000 |
| C | -22.944635000 | -33.637807000 | 202.467417000 |
| N | -21.091560000 | -33.935447000 | 203.614786000 |
| C | -22.100267000 | -34.517468000 | 204.297179000 |
| N | -23.242683000 | -34.356349000 | 203.616181000 |
| N | -21.810511000 | -29.589141000 | 202.172364000 |
| C | -22.896307000 | -28.815019000 | 202.759171000 |
| H | -22.557559000 | -28.453986000 | 203.752878000 |
| C | -24.179639000 | -29.651760000 | 202.957773000 |
| C | -24.769777000 | -30.186700000 | 201.651027000 |
| C | -25.703973000 | -31.366027000 | 201.793564000 |
| O | -26.013388000 | -31.818615000 | 202.946155000 |
| O | -26.124932000 | -31.872545000 | 200.690337000 |
| H | -24.834575000 | -28.949621000 | 209.207366000 |
| C | -25.289739000 | -29.704836000 | 209.874338000 |
| H | -25.215628000 | -29.314217000 | 210.902923000 |
| C | -24.588555000 | -31.073294000 | 209.711917000 |
| C | -24.527511000 | -31.555490000 | 208.289684000 |
| C | -25.313377000 | -32.440414000 | 207.570105000 |
| N | -23.572158000 | -31.107150000 | 207.378808000 |
| C | -23.753541000 | -31.685245000 | 206.172954000 |
| N | -24.815987000 | -32.493117000 | 206.277495000 |
| H | -24.708982000 | -37.374838000 | 210.156821000 |
| C | -25.333665000 | -37.110846000 | 209.273415000 |
| C | -26.303416000 | -38.221731000 | 208.874261000 |
| O | -26.048900000 | -39.053595000 | 207.981901000 |
| C | -24.381963000 | -36.718577000 | 208.144629000 |
| C | -24.983168000 | -36.047495000 | 206.916559000 |
| O | -26.233388000 | -35.745817000 | 206.898665000 |
| O | -24.169026000 | -35.823180000 | 205.965645000 |
| N | -27.489938000 | -38.237325000 | 209.551989000 |
| C | -28.420988000 | -39.357108000 | 209.469748000 |
| C | -29.302287000 | -39.451355000 | 208.216198000 |
| O | -29.909385000 | -40.506221000 | 207.961940000 |
| N | -29.390520000 | -38.329083000 | 207.468900000 |
| C | -30.076425000 | -38.282764000 | 206.181714000 |
| C | -29.360820000 | -37.281465000 | 205.267406000 |
| O | -29.549917000 | -37.304150000 | 204.039567000 |
| O | -28.609784000 | -36.435821000 | 205.924258000 |
| O | -25.579052000 | -37.645763000 | 197.221381000 |
| O | -27.668880000 | -35.852450000 | 197.619447000 |
| O | -26.208058000 | -30.106667000 | 198.137646000 |
| O | -23.894073000 | -31.456339000 | 198.695141000 |
| O | -29.790566000 | -30.399409000 | 202.803042000 |
| O | -25.768329000 | -39.215508000 | 199.517231000 |
| O | -26.795058000 | -39.052722000 | 205.060489000 |
| H | -30.320202000 | -30.628047000 | 209.001378000 |

|   |               |               |               |
|---|---------------|---------------|---------------|
| C | -30.997751000 | -31.051074000 | 208.236197000 |
| H | -31.843803000 | -31.521736000 | 208.767318000 |
| C | -30.273093000 | -32.095385000 | 207.374667000 |
| C | -28.969026000 | -31.553746000 | 206.756310000 |
| C | -28.299215000 | -32.563729000 | 205.849662000 |
| O | -28.048702000 | -33.729071000 | 206.334304000 |
| O | -28.018072000 | -32.191829000 | 204.661702000 |
| H | -36.649140000 | -31.795331000 | 206.869751000 |
| C | -36.971479000 | -32.276075000 | 205.926511000 |
| C | -35.756016000 | -32.775139000 | 205.119447000 |
| C | -34.812144000 | -33.666170000 | 205.950473000 |
| C | -33.733063000 | -34.412487000 | 205.155094000 |
| N | -32.748127000 | -33.505751000 | 204.542655000 |
| C | -31.815642000 | -33.897164000 | 203.644802000 |
| N | -31.648338000 | -35.202301000 | 203.374878000 |
| N | -31.088515000 | -32.994770000 | 202.969489000 |
| O | -27.634086000 | -29.298081000 | 204.201510000 |
| H | -32.905306000 | -42.740268000 | 197.148095000 |
| H | -33.264444000 | -41.000301000 | 197.110561000 |
| H | -33.700323000 | -42.030393000 | 195.723193000 |
| H | -31.535830000 | -40.673692000 | 195.287522000 |
| H | -31.192007000 | -42.416314000 | 195.294707000 |
| H | -30.164840000 | -43.489659000 | 197.377806000 |
| H | -28.610966000 | -43.178882000 | 199.296617000 |
| H | -29.058970000 | -38.883454000 | 198.971827000 |
| H | -30.615169000 | -39.187903000 | 197.048012000 |
| H | -27.402076000 | -41.715167000 | 200.656172000 |
| H | -25.124758000 | -42.440269000 | 199.485648000 |
| H | -27.582275000 | -44.019628000 | 202.556615000 |
| H | -28.789791000 | -37.530844000 | 207.690774000 |
| H | -27.641574000 | -37.540151000 | 210.279240000 |
| H | -21.566289000 | -29.438707000 | 201.195526000 |
| H | -21.661712000 | -43.095889000 | 200.890209000 |
| H | -22.972088000 | -45.417972000 | 202.197540000 |
| H | -23.927844000 | -46.163037000 | 199.995446000 |
| H | -23.381841000 | -44.657323000 | 199.223603000 |
| H | -22.529051000 | -38.873935000 | 201.426881000 |
| H | -24.070566000 | -40.774581000 | 201.533658000 |
| H | -21.978721000 | -41.304929000 | 203.747234000 |
| H | -22.320893000 | -38.841255000 | 203.188296000 |
| H | -24.284314000 | -40.612333000 | 203.285037000 |
| H | -26.359146000 | -29.780160000 | 209.608484000 |
| H | -26.169752000 | -33.047002000 | 207.866354000 |
| H | -23.116868000 | -31.522004000 | 205.295471000 |
| H | -23.719303000 | -33.379564000 | 201.745413000 |
| H | -21.999646000 | -35.060494000 | 205.236625000 |
| H | -19.699391000 | -30.723325000 | 201.262903000 |
| H | -23.080755000 | -27.940635000 | 202.112973000 |
| H | -29.871954000 | -34.536127000 | 197.380640000 |
| H | -32.806021000 | -34.319683000 | 197.891559000 |
| H | -32.921611000 | -31.347461000 | 196.679241000 |
| H | -32.148958000 | -34.453439000 | 195.552430000 |
| H | -30.791830000 | -28.058660000 | 201.379175000 |
| H | -19.930388000 | -33.259564000 | 201.088589000 |
| H | -21.370803000 | -32.335043000 | 200.624197000 |
| H | -25.920925000 | -36.227561000 | 209.589874000 |
| H | -29.984704000 | -39.275264000 | 205.702979000 |
| C | -31.567105000 | -37.916365000 | 206.316186000 |
| H | -32.055186000 | -37.932628000 | 205.325763000 |
| H | -32.072913000 | -38.655344000 | 206.959861000 |
| H | -31.682469000 | -36.916096000 | 206.771185000 |
| H | -29.094101000 | -39.310259000 | 210.342851000 |
| H | -27.858742000 | -40.306732000 | 209.536504000 |
| H | -23.600681000 | -36.034632000 | 208.525574000 |
| H | -23.846757000 | -37.609287000 | 207.767093000 |
| H | -30.065448000 | -36.764071000 | 198.661770000 |
| H | -31.592501000 | -36.172935000 | 199.341786000 |
| H | -31.383272000 | -30.213488000 | 207.627049000 |
| H | -30.033136000 | -32.990817000 | 207.977518000 |
| H | -28.249717000 | -31.306194000 | 207.562827000 |
| H | -30.940587000 | -32.446095000 | 206.561971000 |
| H | -29.135477000 | -30.633273000 | 206.170182000 |
| H | -28.155863000 | -26.417841000 | 201.220208000 |

|   |               |               |               |
|---|---------------|---------------|---------------|
| H | -28.512851000 | -27.624075000 | 202.473230000 |
| H | -25.111143000 | -31.842077000 | 210.308314000 |
| H | -23.556646000 | -31.019529000 | 210.108004000 |
| H | -25.242892000 | -33.094547000 | 205.495078000 |
| H | -37.548238000 | -31.526089000 | 205.357493000 |
| H | -35.197481000 | -31.905120000 | 204.719621000 |
| H | -35.406287000 | -34.443797000 | 206.467902000 |
| H | -33.207709000 | -35.113126000 | 205.834750000 |
| H | -37.646543000 | -33.110946000 | 206.189958000 |
| H | -36.105722000 | -33.344106000 | 204.234680000 |
| H | -34.333941000 | -33.069262000 | 206.753760000 |
| H | -32.841578000 | -32.506448000 | 204.711366000 |
| H | -34.208818000 | -35.014497000 | 204.355163000 |
| H | -31.169551000 | -31.985799000 | 203.132475000 |
| H | -31.984868000 | -35.923298000 | 204.004364000 |
| H | -30.187422000 | -33.259900000 | 202.537638000 |
| H | -30.942318000 | -35.481102000 | 202.678737000 |
| H | -23.932035000 | -30.499242000 | 203.618072000 |
| H | -25.347780000 | -29.412784000 | 201.105713000 |
| H | -24.931801000 | -29.042950000 | 203.492138000 |
| H | -23.987111000 | -30.513999000 | 200.936119000 |
| H | -20.126419000 | -33.878050000 | 203.937331000 |
| H | -29.105027000 | -31.991300000 | 198.752552000 |
| H | -28.513516000 | -30.809140000 | 199.779270000 |
| H | -29.686913000 | -29.948650000 | 201.912582000 |
| H | -29.214028000 | -31.196262000 | 202.623119000 |
| H | -27.119225000 | -30.127634000 | 204.240045000 |
| H | -28.471170000 | -29.616182000 | 203.761860000 |
| H | -32.943763000 | -35.819790000 | 193.652742000 |
| H | -31.698986000 | -37.042269000 | 194.102950000 |
| H | -26.486354000 | -39.867827000 | 199.757079000 |
| H | -25.431449000 | -38.877325000 | 200.401067000 |
| H | -27.637347000 | -39.496552000 | 203.292807000 |
| H | -27.718094000 | -36.649906000 | 199.024768000 |
| H | -26.883036000 | -36.380908000 | 197.312054000 |
| H | -27.290426000 | -35.017222000 | 198.019774000 |
| H | -25.722555000 | -38.223973000 | 196.448597000 |
| H | -25.616181000 | -38.265859000 | 197.999287000 |
| H | -27.968140000 | -39.804927000 | 201.740557000 |
| H | -26.970431000 | -37.901474000 | 199.648602000 |
| H | -24.376332000 | -32.176908000 | 199.142511000 |
| H | -24.663314000 | -30.846202000 | 198.479959000 |
| H | -26.801955000 | -30.864611000 | 198.347820000 |
| H | -26.495336000 | -29.431764000 | 198.828452000 |
| H | -26.703040000 | -39.122577000 | 206.036086000 |
| H | -26.534366000 | -38.113257000 | 204.851452000 |
| H | -25.714446000 | -45.708025000 | 202.111918000 |
| H | -22.821706000 | -30.448321000 | 207.589093000 |
| C | -25.282578000 | -34.615181000 | 199.364357000 |
| H | -24.603845000 | -34.014057000 | 200.003856000 |
| H | -25.486739000 | -35.564957000 | 199.900111000 |
| H | -24.765183000 | -34.841343000 | 198.412329000 |

W3-1

|    |               |               |               |
|----|---------------|---------------|---------------|
| Mn | -24.851110000 | -35.593319000 | 203.907389000 |
| Mn | -27.323206000 | -35.282584000 | 205.208222000 |
| Mn | -27.303482000 | -33.407295000 | 203.143903000 |
| Mn | -27.497557000 | -33.228262000 | 200.406023000 |
| Ca | -27.835155000 | -36.860118000 | 202.215128000 |
| O  | -26.406193000 | -36.570001000 | 204.200237000 |
| O  | -28.331184000 | -34.808798000 | 203.772795000 |
| O  | -25.979081000 | -34.125150000 | 204.487187000 |
| O  | -28.466924000 | -32.685677000 | 201.970165000 |
| O  | -26.708674000 | -34.371076000 | 201.681699000 |
| O  | -28.374989000 | -31.746914000 | 199.314937000 |
| O  | -26.484289000 | -33.774180000 | 198.983433000 |
| O  | -28.856646000 | -38.290656000 | 200.527056000 |
| O  | -27.473465000 | -39.396131000 | 202.886858000 |
| H  | -30.419418000 | -26.791541000 | 200.178486000 |
| C  | -30.241434000 | -27.113395000 | 201.222163000 |
| H  | -30.724377000 | -26.361921000 | 201.871645000 |
| C  | -28.743424000 | -27.370854000 | 201.445938000 |



|   |               |               |               |
|---|---------------|---------------|---------------|
| C | -28.196297000 | -28.520642000 | 200.575502000 |
| O | -28.956123000 | -29.568578000 | 200.473533000 |
| O | -27.062670000 | -28.405704000 | 200.031306000 |
| C | -32.924381000 | -41.850903000 | 196.489835000 |
| C | -31.550187000 | -42.011295000 | 195.806108000 |
| C | -30.411078000 | -41.601764000 | 196.707167000 |
| C | -29.701277000 | -42.544357000 | 197.477295000 |
| C | -30.090114000 | -40.235794000 | 196.863634000 |
| C | -28.707918000 | -42.150582000 | 198.389850000 |
| C | -29.103426000 | -39.826875000 | 197.765763000 |
| C | -28.414326000 | -40.780493000 | 198.540767000 |
| O | -27.487631000 | -40.315365000 | 199.453392000 |
| H | -33.785375000 | -32.318034000 | 197.913159000 |
| C | -32.844739000 | -31.791422000 | 197.688620000 |
| C | -31.620133000 | -32.680112000 | 197.729872000 |
| O | -30.471611000 | -32.198658000 | 197.689448000 |
| H | -32.708598000 | -30.956591000 | 198.395915000 |
| N | -31.858483000 | -34.027928000 | 197.742630000 |
| C | -30.825021000 | -35.049751000 | 197.612821000 |
| C | -31.002638000 | -35.939600000 | 196.374062000 |
| O | -30.321979000 | -36.978527000 | 196.234632000 |
| C | -30.621422000 | -35.852081000 | 198.920541000 |
| C | -29.736502000 | -35.225847000 | 200.010543000 |
| O | -29.782736000 | -35.680678000 | 201.189040000 |
| O | -28.911484000 | -34.320244000 | 199.616541000 |
| N | -31.863248000 | -35.471362000 | 195.442618000 |
| C | -31.935591000 | -35.967611000 | 194.072817000 |
| H | -31.190723000 | -35.442656000 | 193.449429000 |
| H | -21.516057000 | -41.187718000 | 202.032943000 |
| C | -22.352883000 | -41.458335000 | 202.717392000 |
| C | -22.687062000 | -42.933421000 | 202.674187000 |
| O | -23.352606000 | -43.482488000 | 203.574737000 |
| C | -23.596313000 | -40.562826000 | 202.416423000 |
| C | -23.167150000 | -39.095361000 | 202.171538000 |
| C | -24.246633000 | -38.015819000 | 202.308910000 |
| O | -25.334489000 | -38.037487000 | 201.672767000 |
| O | -23.896505000 | -37.057598000 | 203.121412000 |
| N | -22.233229000 | -43.599347000 | 201.573908000 |
| C | -22.629343000 | -44.962153000 | 201.252063000 |
| H | -21.726399000 | -45.520632000 | 200.924621000 |
| C | -23.755262000 | -45.008591000 | 200.190284000 |
| C | -24.841676000 | -44.021997000 | 200.494318000 |
| C | -25.312360000 | -42.931695000 | 199.780471000 |
| N | -25.527881000 | -43.974687000 | 201.701437000 |
| C | -26.351038000 | -42.893896000 | 201.700688000 |
| N | -26.244961000 | -42.246364000 | 200.540919000 |
| H | -19.262626000 | -31.517297000 | 202.779917000 |
| C | -20.112713000 | -31.328697000 | 202.090235000 |
| C | -21.156975000 | -30.548696000 | 202.872767000 |
| O | -21.428155000 | -30.813574000 | 204.064766000 |
| C | -20.723224000 | -32.621958000 | 201.486030000 |
| C | -21.594831000 | -33.382181000 | 202.432713000 |
| C | -22.930653000 | -33.744577000 | 202.379065000 |
| N | -21.141334000 | -33.852012000 | 203.657535000 |
| C | -22.152327000 | -34.464682000 | 204.308138000 |
| N | -23.254831000 | -34.418296000 | 203.548903000 |
| N | -21.813940000 | -29.592455000 | 202.171004000 |
| C | -22.896307000 | -28.815019000 | 202.759171000 |
| H | -22.557559000 | -28.453986000 | 203.752878000 |
| C | -24.184989000 | -29.644622000 | 202.964775000 |
| C | -24.733504000 | -30.233897000 | 201.665976000 |
| C | -25.707355000 | -31.388319000 | 201.804991000 |
| O | -25.992803000 | -31.878301000 | 202.947027000 |
| O | -26.170671000 | -31.826789000 | 200.695455000 |
| H | -24.782445000 | -28.974962000 | 209.216548000 |
| C | -25.289739000 | -29.704836000 | 209.874338000 |
| H | -25.215628000 | -29.314217000 | 210.902923000 |
| C | -24.661722000 | -31.109718000 | 209.720258000 |
| C | -24.596128000 | -31.594458000 | 208.298015000 |
| C | -25.367388000 | -32.494407000 | 207.580230000 |
| N | -23.640496000 | -31.142337000 | 207.388785000 |
| C | -23.808853000 | -31.731719000 | 206.186656000 |
| N | -24.861781000 | -32.552297000 | 206.290414000 |

|   |               |               |               |
|---|---------------|---------------|---------------|
| H | -24.708982000 | -37.374838000 | 210.156821000 |
| C | -25.333665000 | -37.110846000 | 209.273415000 |
| C | -26.293737000 | -38.236699000 | 208.902152000 |
| O | -26.008310000 | -39.115679000 | 208.063424000 |
| C | -24.380371000 | -36.744892000 | 208.133239000 |
| C | -24.981496000 | -36.113765000 | 206.881705000 |
| O | -26.229296000 | -35.802687000 | 206.865969000 |
| O | -24.171801000 | -35.932121000 | 205.915699000 |
| N | -27.497605000 | -38.231670000 | 209.542507000 |
| C | -28.420988000 | -39.357108000 | 209.469748000 |
| C | -29.305990000 | -39.474969000 | 208.220339000 |
| O | -29.906024000 | -40.537827000 | 207.985408000 |
| N | -29.403407000 | -38.366860000 | 207.452916000 |
| C | -30.071058000 | -38.356918000 | 206.154544000 |
| C | -29.326724000 | -37.391308000 | 205.224024000 |
| O | -29.461120000 | -37.476583000 | 203.989900000 |
| O | -28.610750000 | -36.514662000 | 205.873596000 |
| O | -27.523888000 | -36.886105000 | 196.699580000 |
| O | -27.846212000 | -34.133928000 | 196.593811000 |
| O | -26.411137000 | -30.214300000 | 198.082369000 |
| O | -24.447708000 | -31.986763000 | 198.324785000 |
| O | -29.788785000 | -30.480994000 | 202.827714000 |
| O | -26.085097000 | -38.010238000 | 198.867710000 |
| O | -26.233003000 | -39.020703000 | 205.236159000 |
| H | -30.309106000 | -30.640139000 | 208.997724000 |
| C | -30.997751000 | -31.051074000 | 208.236197000 |
| H | -31.843803000 | -31.521736000 | 208.767318000 |
| C | -30.296311000 | -32.113079000 | 207.366229000 |
| C | -28.987267000 | -31.610858000 | 206.723194000 |
| C | -28.326928000 | -32.635157000 | 205.817437000 |
| O | -28.082722000 | -33.804572000 | 206.301830000 |
| O | -28.031050000 | -32.267851000 | 204.633633000 |
| H | -36.629791000 | -31.792243000 | 206.861070000 |
| C | -36.971479000 | -32.276075000 | 205.926511000 |
| C | -35.773339000 | -32.789596000 | 205.098766000 |
| C | -34.828008000 | -33.704805000 | 205.903194000 |
| C | -33.767886000 | -34.456919000 | 205.084352000 |
| N | -32.761698000 | -33.559753000 | 204.490150000 |
| C | -31.804055000 | -33.960148000 | 203.621298000 |
| N | -31.606631000 | -35.269677000 | 203.386817000 |
| N | -31.074041000 | -33.063769000 | 202.943718000 |
| O | -27.610026000 | -29.374775000 | 204.187378000 |
| H | -33.053216000 | -42.565118000 | 197.322446000 |
| H | -33.054548000 | -40.826939000 | 196.884748000 |
| H | -33.700323000 | -42.030393000 | 195.723193000 |
| H | -31.533646000 | -41.392306000 | 194.887737000 |
| H | -31.421619000 | -43.060765000 | 195.478503000 |
| H | -29.934142000 | -43.612929000 | 197.371042000 |
| H | -28.175876000 | -42.899259000 | 198.986441000 |
| H | -28.871399000 | -38.766419000 | 197.896615000 |
| H | -30.617562000 | -39.468610000 | 196.280904000 |
| H | -26.989718000 | -41.127118000 | 199.975095000 |
| H | -25.039560000 | -42.603027000 | 198.775697000 |
| H | -26.991006000 | -42.613305000 | 202.538982000 |
| H | -28.811727000 | -37.558297000 | 207.662350000 |
| H | -27.678825000 | -37.504259000 | 210.232613000 |
| H | -21.527751000 | -29.398534000 | 201.213555000 |
| H | -21.752896000 | -43.059923000 | 200.855172000 |
| H | -22.970513000 | -45.424635000 | 202.194533000 |
| H | -24.149217000 | -46.041640000 | 200.132203000 |
| H | -23.350436000 | -44.763137000 | 199.192369000 |
| H | -22.755196000 | -39.000724000 | 201.147206000 |
| H | -24.140166000 | -40.947085000 | 201.534115000 |
| H | -21.997631000 | -41.229982000 | 203.739584000 |
| H | -22.357069000 | -38.822859000 | 202.869354000 |
| H | -24.292658000 | -40.624551000 | 203.273984000 |
| H | -26.356211000 | -29.721385000 | 209.587245000 |
| H | -26.218816000 | -33.108447000 | 207.875719000 |
| H | -23.170746000 | -31.568608000 | 205.310927000 |
| H | -23.670560000 | -33.600159000 | 201.589255000 |
| H | -22.079496000 | -34.945533000 | 205.283531000 |
| H | -19.699937000 | -30.723939000 | 201.262598000 |
| H | -23.080144000 | -27.942096000 | 202.111186000 |

|   |               |               |               |
|---|---------------|---------------|---------------|
| H | -29.870432000 | -34.508355000 | 197.395632000 |
| H | -32.817705000 | -34.336797000 | 197.905340000 |
| H | -32.915112000 | -31.358172000 | 196.674261000 |
| H | -32.286984000 | -34.564129000 | 195.635257000 |
| H | -30.810840000 | -28.050722000 | 201.357808000 |
| H | -19.906808000 | -33.268682000 | 201.112589000 |
| H | -21.337546000 | -32.358510000 | 200.606953000 |
| H | -25.918832000 | -36.222757000 | 209.577707000 |
| H | -29.989033000 | -39.367478000 | 205.713317000 |
| C | -31.558763000 | -37.966446000 | 206.248280000 |
| H | -32.029000000 | -38.019249000 | 205.250319000 |
| H | -32.085380000 | -38.671738000 | 206.912661000 |
| H | -31.668442000 | -36.946848000 | 206.659695000 |
| H | -29.092346000 | -39.309486000 | 210.344332000 |
| H | -27.858742000 | -40.306732000 | 209.536504000 |
| H | -23.606328000 | -36.043498000 | 208.497192000 |
| H | -23.835825000 | -37.642584000 | 207.787298000 |
| H | -30.109665000 | -36.807400000 | 198.686191000 |
| H | -31.586575000 | -36.131945000 | 199.379491000 |
| H | -31.378082000 | -30.209320000 | 207.630043000 |
| H | -30.069505000 | -33.009996000 | 207.972456000 |
| H | -28.254624000 | -31.363514000 | 207.518148000 |
| H | -30.983081000 | -32.453998000 | 206.565376000 |
| H | -29.142785000 | -30.694684000 | 206.127364000 |
| H | -28.136449000 | -26.471107000 | 201.243885000 |
| H | -28.542060000 | -27.663678000 | 202.495721000 |
| H | -25.237022000 | -31.851106000 | 210.302462000 |
| H | -23.636393000 | -31.113448000 | 210.137158000 |
| H | -25.276010000 | -33.161023000 | 205.503489000 |
| H | -37.548238000 | -31.526089000 | 205.357493000 |
| H | -35.209227000 | -31.923503000 | 204.697600000 |
| H | -35.426231000 | -34.481654000 | 206.417035000 |
| H | -33.254734000 | -35.179514000 | 205.749716000 |
| H | -37.649641000 | -33.103751000 | 206.204061000 |
| H | -36.146217000 | -33.344398000 | 204.214450000 |
| H | -34.330206000 | -33.126590000 | 206.708068000 |
| H | -32.897012000 | -32.556058000 | 204.592886000 |
| H | -34.259242000 | -35.035325000 | 204.275973000 |
| H | -31.146914000 | -32.053224000 | 203.107853000 |
| H | -31.980827000 | -35.981761000 | 204.004425000 |
| H | -30.168032000 | -33.330346000 | 202.519683000 |
| H | -30.871574000 | -35.547319000 | 202.722202000 |
| H | -23.960203000 | -30.462443000 | 203.668677000 |
| H | -25.245365000 | -29.474234000 | 201.042901000 |
| H | -24.953259000 | -29.011581000 | 203.444890000 |
| H | -23.899844000 | -30.625102000 | 201.046785000 |
| H | -20.209976000 | -33.698960000 | 204.041810000 |
| H | -25.706161000 | -33.169717000 | 198.788555000 |
| H | -29.162525000 | -32.030220000 | 198.760635000 |
| H | -28.606786000 | -30.836976000 | 199.818298000 |
| H | -29.715562000 | -30.010265000 | 201.944947000 |
| H | -29.204358000 | -31.267057000 | 202.622390000 |
| H | -27.104182000 | -30.209510000 | 204.234873000 |
| H | -28.455650000 | -29.692627000 | 203.763649000 |
| H | -32.945474000 | -35.793978000 | 193.669602000 |
| H | -31.714389000 | -37.046646000 | 194.063126000 |
| H | -26.484217000 | -38.910578000 | 198.983690000 |
| H | -25.670421000 | -37.843326000 | 199.743119000 |
| H | -27.138552000 | -39.428733000 | 203.830777000 |
| H | -27.654455000 | -35.108441000 | 196.564300000 |
| H | -27.460367000 | -33.893774000 | 197.477784000 |
| H | -28.497651000 | -37.050624000 | 196.726469000 |
| H | -27.143278000 | -37.159379000 | 197.572335000 |
| H | -26.682821000 | -39.640542000 | 202.364275000 |
| H | -28.291994000 | -39.052241000 | 200.209125000 |
| H | -24.042679000 | -31.816782000 | 199.193725000 |
| H | -25.119296000 | -31.225182000 | 198.238061000 |
| H | -27.102457000 | -30.888281000 | 198.306548000 |
| H | -26.569215000 | -29.541269000 | 198.814577000 |
| H | -26.280049000 | -39.068029000 | 206.220776000 |
| H | -26.210432000 | -38.048585000 | 205.002819000 |
| H | -25.319706000 | -44.544072000 | 202.522552000 |
| H | -22.898742000 | -30.473389000 | 207.598228000 |

|   |               |               |               |
|---|---------------|---------------|---------------|
| C | -30.124479000 | -38.855088000 | 200.935088000 |
| H | -30.776341000 | -38.012678000 | 201.217899000 |
| H | -30.585687000 | -39.409737000 | 200.096485000 |
| H | -29.992181000 | -39.521895000 | 201.807846000 |

W3-1d

|    |               |               |               |
|----|---------------|---------------|---------------|
| Mn | -25.039527000 | -35.558894000 | 203.793022000 |
| Mn | -27.429607000 | -35.288564000 | 205.181674000 |
| Mn | -27.387478000 | -33.397565000 | 203.123719000 |
| Mn | -27.455005000 | -33.232837000 | 200.383881000 |
| Ca | -28.530496000 | -37.004211000 | 202.365993000 |
| O  | -26.573793000 | -36.567613000 | 204.121921000 |
| O  | -28.440956000 | -34.784212000 | 203.751633000 |
| O  | -26.095049000 | -34.117207000 | 204.481653000 |
| O  | -28.493983000 | -32.675221000 | 201.889793000 |
| O  | -26.687226000 | -34.316512000 | 201.691659000 |
| O  | -28.327141000 | -31.742541000 | 199.242824000 |
| O  | -26.386325000 | -33.752879000 | 198.967219000 |
| O  | -30.300562000 | -38.190489000 | 201.462958000 |
| O  | -27.530797000 | -39.293000000 | 202.958575000 |
| H  | -30.446902000 | -26.806256000 | 200.178859000 |
| C  | -30.241434000 | -27.113395000 | 201.222163000 |
| H  | -30.724377000 | -26.361921000 | 201.871645000 |
| C  | -28.735929000 | -27.347305000 | 201.414067000 |
| C  | -28.188009000 | -28.482051000 | 200.522508000 |
| O  | -28.936735000 | -29.530824000 | 200.401552000 |
| O  | -27.052399000 | -28.346792000 | 199.980432000 |
| C  | -32.924381000 | -41.850903000 | 196.489835000 |
| C  | -31.812458000 | -40.951082000 | 195.907275000 |
| C  | -30.665186000 | -40.700731000 | 196.865815000 |
| C  | -29.454452000 | -41.418700000 | 196.769976000 |
| C  | -30.787997000 | -39.758990000 | 197.912361000 |
| C  | -28.391064000 | -41.193122000 | 197.663655000 |
| C  | -29.752046000 | -39.532136000 | 198.828304000 |
| C  | -28.541039000 | -40.242941000 | 198.694956000 |
| O  | -27.524712000 | -39.960189000 | 199.580190000 |
| H  | -33.785375000 | -32.318034000 | 197.913159000 |
| C  | -32.844739000 | -31.791422000 | 197.688620000 |
| C  | -31.614889000 | -32.673832000 | 197.702654000 |
| O  | -30.467250000 | -32.190539000 | 197.632270000 |
| H  | -32.703255000 | -30.967942000 | 198.408672000 |
| N  | -31.852287000 | -34.017672000 | 197.727739000 |
| C  | -30.825021000 | -35.049751000 | 197.612821000 |
| C  | -31.049845000 | -35.965092000 | 196.394626000 |
| O  | -30.449133000 | -37.050345000 | 196.281906000 |
| C  | -30.631170000 | -35.793014000 | 198.946638000 |
| C  | -29.754230000 | -35.087042000 | 199.984826000 |
| O  | -29.942438000 | -35.303100000 | 201.210697000 |
| O  | -28.791934000 | -34.362134000 | 199.527869000 |
| N  | -31.870086000 | -35.458784000 | 195.439177000 |
| C  | -31.935591000 | -35.967611000 | 194.072817000 |
| H  | -31.190723000 | -35.442656000 | 193.449429000 |
| H  | -21.516057000 | -41.187718000 | 202.032943000 |
| C  | -22.352883000 | -41.458335000 | 202.717392000 |
| C  | -22.696379000 | -42.930546000 | 202.664407000 |
| O  | -23.403149000 | -43.470430000 | 203.541845000 |
| C  | -23.570771000 | -40.558049000 | 202.434900000 |
| C  | -23.213589000 | -39.104246000 | 202.743930000 |
| C  | -24.286872000 | -38.077856000 | 202.426021000 |
| O  | -25.272576000 | -38.328191000 | 201.708966000 |
| O  | -24.020841000 | -36.902773000 | 202.947552000 |
| N  | -22.207872000 | -43.610468000 | 201.591377000 |
| C  | -22.629343000 | -44.962153000 | 201.252063000 |
| H  | -21.726399000 | -45.520632000 | 200.924621000 |
| C  | -23.719623000 | -44.963664000 | 200.143711000 |
| C  | -24.750813000 | -43.886537000 | 200.324375000 |
| C  | -25.175495000 | -42.868845000 | 199.479757000 |
| N  | -25.463059000 | -43.683832000 | 201.500082000 |
| C  | -26.248098000 | -42.581796000 | 201.350540000 |
| N  | -26.104681000 | -42.073140000 | 200.128207000 |
| H  | -19.262626000 | -31.517297000 | 202.779917000 |
| C  | -20.112713000 | -31.328697000 | 202.090235000 |

|   |               |               |               |
|---|---------------|---------------|---------------|
| C | -21.128245000 | -30.512541000 | 202.875446000 |
| O | -21.354896000 | -30.727932000 | 204.086472000 |
| C | -20.778542000 | -32.612803000 | 201.516568000 |
| C | -21.717854000 | -33.312888000 | 202.450825000 |
| C | -23.049074000 | -33.686267000 | 202.331500000 |
| N | -21.336020000 | -33.748594000 | 203.712459000 |
| C | -22.383523000 | -34.352123000 | 204.316822000 |
| N | -23.439183000 | -34.334016000 | 203.495401000 |
| N | -21.817336000 | -29.587530000 | 202.161127000 |
| C | -22.896307000 | -28.815019000 | 202.759171000 |
| H | -22.557559000 | -28.453986000 | 203.752878000 |
| C | -24.171638000 | -29.656553000 | 202.995756000 |
| C | -24.814477000 | -30.155748000 | 201.705272000 |
| C | -25.746154000 | -31.347253000 | 201.828290000 |
| O | -26.073368000 | -31.824056000 | 202.961813000 |
| O | -26.145403000 | -31.812523000 | 200.701959000 |
| H | -24.736883000 | -29.000533000 | 209.225171000 |
| C | -25.289739000 | -29.704836000 | 209.874338000 |
| H | -25.215628000 | -29.314217000 | 210.902923000 |
| C | -24.732642000 | -31.139813000 | 209.723046000 |
| C | -24.683112000 | -31.626742000 | 208.299857000 |
| C | -25.459085000 | -32.530648000 | 207.591295000 |
| N | -23.737361000 | -31.174472000 | 207.379852000 |
| C | -23.919292000 | -31.768170000 | 206.181429000 |
| N | -24.967730000 | -32.591648000 | 206.296230000 |
| H | -24.708982000 | -37.374838000 | 210.156821000 |
| C | -25.333665000 | -37.110846000 | 209.273415000 |
| C | -26.288811000 | -38.241791000 | 208.901617000 |
| O | -26.000743000 | -39.122202000 | 208.067030000 |
| C | -24.419160000 | -36.722788000 | 208.097541000 |
| C | -25.065632000 | -36.133150000 | 206.832246000 |
| O | -26.313278000 | -35.818920000 | 206.848375000 |
| O | -24.295369000 | -35.983414000 | 205.831686000 |
| N | -27.494139000 | -38.234148000 | 209.539890000 |
| C | -28.420988000 | -39.357108000 | 209.469748000 |
| C | -29.384306000 | -39.414931000 | 208.286400000 |
| O | -30.000051000 | -40.462966000 | 208.026536000 |
| N | -29.566041000 | -38.240622000 | 207.643193000 |
| C | -30.383844000 | -38.113967000 | 206.447146000 |
| C | -29.685652000 | -37.179813000 | 205.454127000 |
| O | -30.081390000 | -37.151579000 | 204.273936000 |
| O | -28.711148000 | -36.485030000 | 205.963436000 |
| O | -27.857311000 | -37.119216000 | 197.335894000 |
| O | -27.695125000 | -34.441775000 | 196.609792000 |
| O | -26.345715000 | -30.174749000 | 198.070823000 |
| O | -24.275603000 | -31.814013000 | 198.465969000 |
| O | -29.800671000 | -30.479382000 | 202.735111000 |
| O | -27.428199000 | -37.389502000 | 200.153716000 |
| O | -26.054107000 | -38.955981000 | 205.198142000 |
| H | -30.314824000 | -30.628337000 | 208.996530000 |
| C | -30.997751000 | -31.051074000 | 208.236197000 |
| H | -31.843803000 | -31.521736000 | 208.767318000 |
| C | -30.289034000 | -32.109172000 | 207.380663000 |
| C | -29.006937000 | -31.586127000 | 206.710402000 |
| C | -28.379889000 | -32.617124000 | 205.793744000 |
| O | -28.140395000 | -33.782222000 | 206.285755000 |
| O | -28.126900000 | -32.256414000 | 204.599274000 |
| H | -36.632482000 | -31.790423000 | 206.861452000 |
| C | -36.971479000 | -32.276075000 | 205.926511000 |
| C | -35.772947000 | -32.797061000 | 205.109389000 |
| C | -34.844858000 | -33.712804000 | 205.929348000 |
| C | -33.783670000 | -34.471852000 | 205.122918000 |
| N | -32.777312000 | -33.583438000 | 204.523182000 |
| C | -31.935854000 | -33.952981000 | 203.529136000 |
| N | -31.959944000 | -35.222137000 | 203.071003000 |
| N | -31.140315000 | -33.057192000 | 202.931860000 |
| O | -27.660236000 | -29.372760000 | 204.140381000 |
| H | -32.515117000 | -42.828500000 | 196.805032000 |
| H | -33.398663000 | -41.381694000 | 197.371204000 |
| H | -33.700323000 | -42.030393000 | 195.723193000 |
| H | -32.252611000 | -39.979483000 | 195.606410000 |
| H | -31.422275000 | -41.414378000 | 194.980172000 |
| H | -29.329538000 | -42.159576000 | 195.967221000 |

|   |               |               |               |
|---|---------------|---------------|---------------|
| H | -27.446122000 | -41.740415000 | 197.556070000 |
| H | -29.882301000 | -38.860436000 | 199.702248000 |
| H | -31.717326000 | -39.181317000 | 198.009504000 |
| H | -26.895958000 | -40.788329000 | 199.724899000 |
| H | -24.865347000 | -42.668717000 | 198.451706000 |
| H | -26.888919000 | -42.178833000 | 202.138062000 |
| H | -28.911590000 | -37.474286000 | 207.825503000 |
| H | -27.669175000 | -37.508526000 | 210.233214000 |
| H | -21.581787000 | -29.440319000 | 201.181858000 |
| H | -21.709824000 | -43.077116000 | 200.880038000 |
| H | -23.005408000 | -45.428211000 | 202.178113000 |
| H | -24.187666000 | -45.967159000 | 200.110817000 |
| H | -23.249642000 | -44.802751000 | 199.156944000 |
| H | -22.311221000 | -38.792652000 | 202.178484000 |
| H | -23.899077000 | -40.666105000 | 201.384574000 |
| H | -21.993779000 | -41.259584000 | 203.745899000 |
| H | -22.954607000 | -38.982423000 | 203.812205000 |
| H | -24.422092000 | -40.872288000 | 203.067028000 |
| H | -26.350809000 | -29.667064000 | 209.569207000 |
| H | -26.307789000 | -33.145240000 | 207.893545000 |
| H | -23.295049000 | -31.604220000 | 205.298136000 |
| H | -23.743693000 | -33.574050000 | 201.496424000 |
| H | -22.365760000 | -34.814204000 | 205.303848000 |
| H | -19.697670000 | -30.749217000 | 201.245881000 |
| H | -23.098996000 | -27.943526000 | 202.114685000 |
| H | -29.868623000 | -34.528014000 | 197.369708000 |
| H | -32.808954000 | -34.324850000 | 197.907305000 |
| H | -32.925059000 | -31.338057000 | 196.683794000 |
| H | -32.231827000 | -34.520230000 | 195.605141000 |
| H | -30.794099000 | -28.057332000 | 201.379091000 |
| H | -19.987969000 | -33.311486000 | 201.182146000 |
| H | -21.354885000 | -32.344817000 | 200.613291000 |
| H | -25.927786000 | -36.231276000 | 209.586638000 |
| H | -30.440176000 | -39.107031000 | 205.962940000 |
| C | -31.812773000 | -37.626125000 | 206.748483000 |
| H | -32.399185000 | -37.578774000 | 205.814356000 |
| H | -32.310590000 | -38.332679000 | 207.433642000 |
| H | -31.794070000 | -36.628170000 | 207.222100000 |
| H | -29.056386000 | -39.316080000 | 210.373477000 |
| H | -27.858742000 | -40.306732000 | 209.536504000 |
| H | -23.668695000 | -35.983029000 | 208.434793000 |
| H | -23.845939000 | -37.603506000 | 207.755941000 |
| H | -30.141060000 | -36.770729000 | 198.777668000 |
| H | -31.598493000 | -36.031427000 | 199.423492000 |
| H | -31.382295000 | -30.216199000 | 207.622724000 |
| H | -30.033770000 | -32.992278000 | 207.995370000 |
| H | -28.256826000 | -31.330552000 | 207.485874000 |
| H | -30.977689000 | -32.481577000 | 206.595821000 |
| H | -29.187916000 | -30.673601000 | 206.116210000 |
| H | -28.147876000 | -26.435904000 | 201.207204000 |
| H | -28.506563000 | -27.647605000 | 202.456176000 |
| H | -25.348412000 | -31.852316000 | 210.299837000 |
| H | -23.711415000 | -31.195924000 | 210.146855000 |
| H | -25.395275000 | -33.199953000 | 205.504693000 |
| H | -37.548238000 | -31.526089000 | 205.357493000 |
| H | -35.194039000 | -31.941603000 | 204.708300000 |
| H | -35.451996000 | -34.482449000 | 206.444269000 |
| H | -33.282025000 | -35.207171000 | 205.783755000 |
| H | -37.653169000 | -33.100502000 | 206.206140000 |
| H | -36.141260000 | -33.355572000 | 204.225502000 |
| H | -34.353508000 | -33.132193000 | 206.737581000 |
| H | -32.664978000 | -32.649556000 | 204.911803000 |
| H | -34.269915000 | -35.039861000 | 204.306519000 |
| H | -31.147604000 | -32.055454000 | 203.149330000 |
| H | -32.098284000 | -35.988557000 | 203.727677000 |
| H | -30.297261000 | -33.371194000 | 202.423468000 |
| H | -31.289957000 | -35.439107000 | 202.309268000 |
| H | -23.894388000 | -30.520258000 | 203.622774000 |
| H | -25.405828000 | -29.366336000 | 201.197620000 |
| H | -24.899764000 | -29.061078000 | 203.576008000 |
| H | -24.034042000 | -30.449897000 | 200.975459000 |
| H | -20.434517000 | -33.567467000 | 204.151084000 |
| H | -25.635447000 | -33.122529000 | 198.805183000 |

|   |               |               |               |
|---|---------------|---------------|---------------|
| H | -29.113230000 | -32.027504000 | 198.692342000 |
| H | -28.572176000 | -30.850805000 | 199.738407000 |
| H | -29.715496000 | -29.998822000 | 201.859220000 |
| H | -29.236573000 | -31.280121000 | 202.515310000 |
| H | -27.130675000 | -30.193943000 | 204.175273000 |
| H | -28.488459000 | -29.707127000 | 203.692804000 |
| H | -32.944407000 | -35.805168000 | 193.660755000 |
| H | -31.707727000 | -37.045158000 | 194.076701000 |
| H | -27.404584000 | -38.391665000 | 199.990205000 |
| H | -26.479001000 | -37.169169000 | 200.272492000 |
| H | -27.109458000 | -39.334436000 | 203.865195000 |
| H | -27.738577000 | -35.411271000 | 196.831345000 |
| H | -27.319189000 | -34.073835000 | 197.453992000 |
| H | -28.798170000 | -37.327513000 | 197.109445000 |
| H | -27.803042000 | -37.143262000 | 198.323885000 |
| H | -26.738619000 | -39.309154000 | 202.369284000 |
| H | -24.219441000 | -31.814120000 | 199.438763000 |
| H | -24.998605000 | -31.116150000 | 198.307377000 |
| H | -27.021057000 | -30.868616000 | 198.284185000 |
| H | -26.541745000 | -29.496660000 | 198.790636000 |
| H | -26.136931000 | -38.996552000 | 206.179219000 |
| H | -26.164899000 | -37.992143000 | 204.950053000 |
| H | -25.276592000 | -44.151359000 | 202.389770000 |
| H | -22.995111000 | -30.502982000 | 207.578196000 |
| C | -31.673454000 | -38.181402000 | 201.519507000 |
| H | -32.138073000 | -37.244616000 | 201.097648000 |
| H | -32.146921000 | -39.027801000 | 200.951093000 |
| H | -32.069645000 | -38.252470000 | 202.570697000 |

W4-1

|    |               |               |               |
|----|---------------|---------------|---------------|
| Mn | -24.855254000 | -35.546393000 | 203.914777000 |
| Mn | -27.306372000 | -35.269358000 | 205.216492000 |
| Mn | -27.314872000 | -33.363608000 | 203.139601000 |
| Mn | -27.558003000 | -33.175335000 | 200.404599000 |
| Ca | -27.859407000 | -36.779804000 | 202.172735000 |
| O  | -26.402181000 | -36.547593000 | 204.207116000 |
| O  | -28.324319000 | -34.796373000 | 203.764304000 |
| O  | -25.994149000 | -34.088456000 | 204.483490000 |
| O  | -28.489112000 | -32.624829000 | 201.983503000 |
| O  | -26.737798000 | -34.305791000 | 201.668580000 |
| O  | -28.412273000 | -31.690579000 | 199.302441000 |
| O  | -26.542455000 | -33.738649000 | 198.979462000 |
| O  | -27.590785000 | -37.212289000 | 199.828007000 |
| O  | -28.144164000 | -39.197937000 | 202.168093000 |
| H  | -30.477593000 | -26.832298000 | 200.178469000 |
| C  | -30.241434000 | -27.113395000 | 201.222163000 |
| H  | -30.724377000 | -26.361921000 | 201.871645000 |
| C  | -28.725480000 | -27.296345000 | 201.388232000 |
| C  | -28.167971000 | -28.440387000 | 200.519344000 |
| O  | -28.918250000 | -29.496974000 | 200.434763000 |
| O  | -27.041981000 | -28.316381000 | 199.963485000 |
| C  | -32.924381000 | -41.850903000 | 196.489835000 |
| C  | -33.229243000 | -40.919025000 | 197.676623000 |
| C  | -31.934696000 | -40.773412000 | 198.461348000 |
| C  | -31.044233000 | -39.709045000 | 198.199776000 |
| C  | -31.491133000 | -41.813033000 | 199.308844000 |
| C  | -29.742090000 | -39.698640000 | 198.725812000 |
| C  | -30.191947000 | -41.819906000 | 199.843385000 |
| C  | -29.303799000 | -40.772134000 | 199.523907000 |
| O  | -28.010944000 | -40.753811000 | 200.017224000 |
| H  | -33.785375000 | -32.318034000 | 197.913159000 |
| C  | -32.844739000 | -31.791422000 | 197.688620000 |
| C  | -31.615493000 | -32.675204000 | 197.698577000 |
| O  | -30.466396000 | -32.192750000 | 197.600484000 |
| H  | -32.701970000 | -30.969273000 | 198.410185000 |
| N  | -31.847872000 | -34.017288000 | 197.752322000 |
| C  | -30.825021000 | -35.049751000 | 197.612821000 |
| C  | -31.075465000 | -35.968418000 | 196.394760000 |
| O  | -30.530877000 | -37.078822000 | 196.307265000 |
| C  | -30.612601000 | -35.848664000 | 198.911068000 |
| C  | -29.779868000 | -35.204406000 | 200.026863000 |
| O  | -29.825518000 | -35.691061000 | 201.181543000 |

|   |               |               |               |
|---|---------------|---------------|---------------|
| O | -28.995073000 | -34.238710000 | 199.656405000 |
| N | -31.869850000 | -35.433686000 | 195.428746000 |
| C | -31.935591000 | -35.967611000 | 194.072817000 |
| H | -31.190723000 | -35.442656000 | 193.449429000 |
| H | -21.516057000 | -41.187718000 | 202.032943000 |
| C | -22.352883000 | -41.458335000 | 202.717392000 |
| C | -22.685112000 | -42.930529000 | 202.662350000 |
| O | -23.334542000 | -43.490119000 | 203.574666000 |
| C | -23.587233000 | -40.561615000 | 202.442490000 |
| C | -23.147114000 | -39.089155000 | 202.410572000 |
| C | -24.248016000 | -38.039651000 | 202.471917000 |
| O | -25.363866000 | -38.173031000 | 201.914921000 |
| O | -23.877632000 | -36.967027000 | 203.120679000 |
| N | -22.267011000 | -43.585859000 | 201.546569000 |
| C | -22.629343000 | -44.962153000 | 201.252063000 |
| H | -21.726399000 | -45.520632000 | 200.924621000 |
| C | -23.764914000 | -45.069846000 | 200.209306000 |
| C | -24.974045000 | -44.248565000 | 200.560779000 |
| C | -25.830762000 | -43.480077000 | 199.785377000 |
| N | -25.462073000 | -44.123669000 | 201.856158000 |
| C | -26.536655000 | -43.295640000 | 201.841602000 |
| N | -26.798587000 | -42.903030000 | 200.593887000 |
| H | -19.262626000 | -31.517297000 | 202.779917000 |
| C | -20.112713000 | -31.328697000 | 202.090235000 |
| C | -21.157326000 | -30.549203000 | 202.872942000 |
| O | -21.426947000 | -30.811915000 | 204.065696000 |
| C | -20.717869000 | -32.621495000 | 201.482423000 |
| C | -21.592627000 | -33.372803000 | 202.431200000 |
| C | -22.938011000 | -33.697519000 | 202.395519000 |
| N | -21.136076000 | -33.851463000 | 203.651398000 |
| C | -22.155394000 | -34.433893000 | 204.316239000 |
| N | -23.265535000 | -34.358245000 | 203.571006000 |
| N | -21.814324000 | -29.593345000 | 202.170834000 |
| C | -22.896307000 | -28.815019000 | 202.759171000 |
| H | -22.557559000 | -28.453986000 | 203.752878000 |
| C | -24.186473000 | -29.641969000 | 202.957762000 |
| C | -24.745771000 | -30.208926000 | 201.653100000 |
| C | -25.733034000 | -31.352794000 | 201.784755000 |
| O | -26.009627000 | -31.850681000 | 202.928672000 |
| O | -26.215320000 | -31.773463000 | 200.678479000 |
| H | -24.795026000 | -28.968354000 | 209.214366000 |
| C | -25.289739000 | -29.704836000 | 209.874338000 |
| H | -25.215628000 | -29.314217000 | 210.902923000 |
| C | -24.643875000 | -31.101016000 | 209.717803000 |
| C | -24.579641000 | -31.581035000 | 208.294482000 |
| C | -25.358599000 | -32.469919000 | 207.571739000 |
| N | -23.622052000 | -31.129351000 | 207.387311000 |
| C | -23.795934000 | -31.709087000 | 206.181259000 |
| N | -24.855238000 | -32.521763000 | 206.281127000 |
| H | -24.708982000 | -37.374838000 | 210.156821000 |
| C | -25.333665000 | -37.110846000 | 209.273415000 |
| C | -26.286361000 | -38.247556000 | 208.918620000 |
| O | -25.990703000 | -39.149999000 | 208.111207000 |
| C | -24.386177000 | -36.743892000 | 208.125944000 |
| C | -24.979386000 | -36.071723000 | 206.891138000 |
| O | -26.234894000 | -35.780032000 | 206.870694000 |
| O | -24.168291000 | -35.838370000 | 205.942175000 |
| N | -27.498803000 | -38.231221000 | 209.545119000 |
| C | -28.420988000 | -39.357108000 | 209.469748000 |
| C | -29.309469000 | -39.462626000 | 208.223690000 |
| O | -29.902153000 | -40.524164000 | 207.967289000 |
| N | -29.423066000 | -38.334081000 | 207.488232000 |
| C | -30.104005000 | -38.287650000 | 206.199661000 |
| C | -29.328999000 | -37.348176000 | 205.268751000 |
| O | -29.449168000 | -37.439092000 | 204.033713000 |
| O | -28.610075000 | -36.470739000 | 205.912766000 |
| O | -25.308723000 | -37.635063000 | 197.283894000 |
| O | -27.433334000 | -35.822120000 | 197.621685000 |
| O | -26.445189000 | -30.171718000 | 198.049603000 |
| O | -24.542891000 | -32.001749000 | 198.224770000 |
| O | -29.665698000 | -30.295832000 | 202.852185000 |
| O | -25.766347000 | -39.303751000 | 199.472060000 |
| O | -25.389846000 | -38.921382000 | 205.329464000 |



|   |               |               |               |
|---|---------------|---------------|---------------|
| H | -30.292972000 | -30.675221000 | 209.001368000 |
| C | -30.997751000 | -31.051074000 | 208.236197000 |
| H | -31.843803000 | -31.521736000 | 208.767318000 |
| C | -30.323056000 | -32.093689000 | 207.325670000 |
| C | -28.989278000 | -31.597569000 | 206.730731000 |
| C | -28.330346000 | -32.614373000 | 205.819357000 |
| O | -28.077556000 | -33.781971000 | 206.300259000 |
| O | -28.050549000 | -32.242498000 | 204.632032000 |
| H | -36.631444000 | -31.776983000 | 206.854225000 |
| C | -36.971479000 | -32.276075000 | 205.926511000 |
| C | -35.768480000 | -32.801688000 | 205.122005000 |
| C | -34.739136000 | -33.529167000 | 206.007691000 |
| C | -33.638371000 | -34.280875000 | 205.248480000 |
| N | -32.874920000 | -33.393509000 | 204.362917000 |
| C | -31.676620000 | -33.702016000 | 203.816818000 |
| N | -31.066262000 | -34.859965000 | 204.099732000 |
| N | -31.080874000 | -32.829916000 | 202.986359000 |
| O | -27.472188000 | -29.323419000 | 204.249506000 |
| H | -32.047073000 | -41.458035000 | 195.940055000 |
| H | -32.624374000 | -42.846673000 | 196.868682000 |
| H | -33.700323000 | -42.030393000 | 195.723193000 |
| H | -34.032941000 | -41.342350000 | 198.309627000 |
| H | -33.576878000 | -39.930676000 | 197.321361000 |
| H | -31.344040000 | -38.883808000 | 197.540255000 |
| H | -29.055089000 | -38.869175000 | 198.517982000 |
| H | -29.857917000 | -42.636888000 | 200.495272000 |
| H | -32.165098000 | -42.651565000 | 199.533756000 |
| H | -27.606341000 | -41.744294000 | 200.260440000 |
| H | -25.808000000 | -43.307325000 | 198.707737000 |
| H | -27.081578000 | -42.998528000 | 202.738676000 |
| H | -28.830138000 | -37.531736000 | 207.716571000 |
| H | -27.688951000 | -37.494622000 | 210.222903000 |
| H | -21.529429000 | -29.401437000 | 201.212654000 |
| H | -21.785292000 | -43.049391000 | 200.826583000 |
| H | -22.941193000 | -45.421369000 | 202.206624000 |
| H | -24.037078000 | -46.139341000 | 200.107555000 |
| H | -23.405835000 | -44.741579000 | 199.217319000 |
| H | -22.569340000 | -38.883271000 | 201.486155000 |
| H | -24.071695000 | -40.847038000 | 201.488842000 |
| H | -21.991548000 | -41.249028000 | 203.741918000 |
| H | -22.464601000 | -38.880564000 | 203.252662000 |
| H | -24.331118000 | -40.710235000 | 203.246592000 |
| H | -26.357326000 | -29.735567000 | 209.592603000 |
| H | -26.213901000 | -33.079841000 | 207.864445000 |
| H | -23.156771000 | -31.545309000 | 205.306233000 |
| H | -23.682560000 | -33.535159000 | 201.613770000 |
| H | -22.083536000 | -34.917864000 | 205.290048000 |
| H | -19.698874000 | -30.720293000 | 201.265549000 |
| H | -23.076923000 | -27.940367000 | 202.112317000 |
| H | -29.875074000 | -34.525854000 | 197.385681000 |
| H | -32.806584000 | -34.326409000 | 197.915477000 |
| H | -32.925468000 | -31.334869000 | 196.685349000 |
| H | -32.179549000 | -34.472434000 | 195.566263000 |
| H | -30.764425000 | -28.067251000 | 201.412639000 |
| H | -19.899820000 | -33.269067000 | 201.114371000 |
| H | -21.328766000 | -32.359002000 | 200.600774000 |
| H | -25.919893000 | -36.223877000 | 209.578763000 |
| H | -30.075654000 | -39.299013000 | 205.753867000 |
| C | -31.570647000 | -37.827274000 | 206.313861000 |
| H | -32.053732000 | -37.836495000 | 205.320344000 |
| H | -32.125026000 | -38.518315000 | 206.970569000 |
| H | -31.624888000 | -36.812642000 | 206.748045000 |
| H | -29.092028000 | -39.312049000 | 210.345190000 |
| H | -27.858742000 | -40.306732000 | 209.536504000 |
| H | -23.585524000 | -36.075184000 | 208.492731000 |
| H | -23.874452000 | -37.648786000 | 207.747964000 |
| H | -30.048975000 | -36.765691000 | 198.652092000 |
| H | -31.571459000 | -36.184831000 | 199.344245000 |
| H | -31.371384000 | -30.184510000 | 207.661913000 |
| H | -30.130078000 | -33.024643000 | 207.890930000 |
| H | -28.275246000 | -31.386435000 | 207.552154000 |
| H | -31.008610000 | -32.369947000 | 206.499159000 |
| H | -29.115046000 | -30.664597000 | 206.154479000 |

|   |               |               |               |
|---|---------------|---------------|---------------|
| H | -28.167566000 | -26.375489000 | 201.144257000 |
| H | -28.469131000 | -27.557104000 | 202.435016000 |
| H | -25.207181000 | -31.850061000 | 210.301957000 |
| H | -23.616734000 | -31.091806000 | 210.129922000 |
| H | -25.272748000 | -33.126241000 | 205.494952000 |
| H | -37.548238000 | -31.526089000 | 205.357493000 |
| H | -35.281100000 | -31.947113000 | 204.609852000 |
| H | -35.257740000 | -34.277253000 | 206.637890000 |
| H | -32.935300000 | -34.727478000 | 205.976291000 |
| H | -37.649863000 | -33.097186000 | 206.221052000 |
| H | -36.118760000 | -33.482477000 | 204.320088000 |
| H | -34.273560000 | -32.803032000 | 206.703379000 |
| H | -33.381749000 | -32.626401000 | 203.923416000 |
| H | -34.085382000 | -35.108732000 | 204.658979000 |
| H | -31.234700000 | -31.821876000 | 203.080251000 |
| H | -31.586146000 | -35.672095000 | 204.415846000 |
| H | -30.165279000 | -33.061189000 | 202.557239000 |
| H | -30.061624000 | -34.970473000 | 203.855556000 |
| H | -23.961115000 | -30.472512000 | 203.646639000 |
| H | -25.250439000 | -29.435740000 | 201.040743000 |
| H | -24.951006000 | -29.015004000 | 203.451542000 |
| H | -23.923040000 | -30.605193000 | 201.023113000 |
| H | -20.196133000 | -33.723119000 | 204.023501000 |
| H | -25.771252000 | -33.136817000 | 198.745675000 |
| H | -29.202087000 | -31.967836000 | 198.751384000 |
| H | -28.616822000 | -30.767107000 | 199.792768000 |
| H | -29.585967000 | -29.890321000 | 201.937411000 |
| H | -29.151638000 | -31.133776000 | 202.692321000 |
| H | -27.014668000 | -30.186149000 | 204.282083000 |
| H | -28.320223000 | -29.577462000 | 203.787064000 |
| H | -32.943324000 | -35.817037000 | 193.652767000 |
| H | -31.700503000 | -37.042977000 | 194.096773000 |
| H | -26.562618000 | -39.899886000 | 199.531523000 |
| H | -25.548242000 | -39.058010000 | 200.416328000 |
| H | -27.618993000 | -36.627273000 | 198.988945000 |
| H | -26.637203000 | -36.352316000 | 197.353702000 |
| H | -27.060880000 | -34.987137000 | 198.049081000 |
| H | -25.395666000 | -38.188545000 | 196.485237000 |
| H | -25.411733000 | -38.275868000 | 198.037609000 |
| H | -28.096371000 | -39.738268000 | 201.328034000 |
| H | -26.932744000 | -37.913706000 | 199.595105000 |
| H | -23.999768000 | -31.832678000 | 199.015098000 |
| H | -25.182164000 | -31.208154000 | 198.196968000 |
| H | -27.140878000 | -30.834083000 | 198.295172000 |
| H | -26.579225000 | -29.485038000 | 198.774562000 |
| H | -25.637581000 | -38.922956000 | 206.282353000 |
| H | -25.793440000 | -38.095239000 | 204.965196000 |
| H | -24.943755000 | -44.382411000 | 202.706150000 |
| H | -22.875320000 | -30.467213000 | 207.600505000 |
| C | -27.687888000 | -40.045803000 | 203.234627000 |
| H | -27.646649000 | -39.449865000 | 204.159478000 |
| H | -28.376514000 | -40.900322000 | 203.387064000 |
| H | -26.662788000 | -40.413542000 | 203.040720000 |

W4-1d

|    |               |               |               |
|----|---------------|---------------|---------------|
| Mn | -24.877261000 | -35.549934000 | 203.916463000 |
| Mn | -27.325585000 | -35.287748000 | 205.185620000 |
| Mn | -27.335219000 | -33.392166000 | 203.133080000 |
| Mn | -27.531270000 | -33.202429000 | 200.391790000 |
| Ca | -27.884162000 | -36.839992000 | 202.131263000 |
| O  | -26.415978000 | -36.553719000 | 204.167718000 |
| O  | -28.344198000 | -34.820136000 | 203.711226000 |
| O  | -26.007013000 | -34.079564000 | 204.454774000 |
| O  | -28.484059000 | -32.641348000 | 201.932095000 |
| O  | -26.725692000 | -34.315964000 | 201.648325000 |
| O  | -28.368865000 | -31.698077000 | 199.255110000 |
| O  | -26.508313000 | -33.758801000 | 198.941673000 |
| O  | -27.634688000 | -37.083556000 | 199.749984000 |
| O  | -28.285600000 | -39.136203000 | 201.962962000 |
| H  | -30.488857000 | -26.836773000 | 200.179640000 |
| C  | -30.241434000 | -27.113395000 | 201.222163000 |
| H  | -30.724377000 | -26.361921000 | 201.871645000 |

|   |               |               |               |
|---|---------------|---------------|---------------|
| C | -28.723141000 | -27.286264000 | 201.374135000 |
| C | -28.165640000 | -28.408902000 | 200.476404000 |
| O | -28.898907000 | -29.472395000 | 200.380152000 |
| O | -27.048564000 | -28.255071000 | 199.905476000 |
| C | -32.924381000 | -41.850903000 | 196.489835000 |
| C | -33.226438000 | -40.894397000 | 197.661966000 |
| C | -31.928090000 | -40.746311000 | 198.440248000 |
| C | -31.005169000 | -39.725706000 | 198.117298000 |
| C | -31.490050000 | -41.776853000 | 199.300560000 |
| C | -29.672685000 | -39.775283000 | 198.554393000 |
| C | -30.158944000 | -41.846485000 | 199.743876000 |
| C | -29.224253000 | -40.877307000 | 199.313535000 |
| O | -27.890723000 | -41.013168000 | 199.558348000 |
| H | -33.785375000 | -32.318034000 | 197.913159000 |
| C | -32.844739000 | -31.791422000 | 197.688620000 |
| C | -31.615174000 | -32.675713000 | 197.687307000 |
| O | -30.468350000 | -32.192234000 | 197.573392000 |
| H | -32.698341000 | -30.975012000 | 198.416137000 |
| N | -31.847854000 | -34.017159000 | 197.751351000 |
| C | -30.825021000 | -35.049751000 | 197.612821000 |
| C | -31.065384000 | -35.961951000 | 196.388818000 |
| O | -30.498003000 | -37.058409000 | 196.285132000 |
| C | -30.611688000 | -35.846001000 | 198.911910000 |
| C | -29.781911000 | -35.187262000 | 200.023778000 |
| O | -29.863394000 | -35.626682000 | 201.192086000 |
| O | -28.960598000 | -34.259411000 | 199.625695000 |
| N | -31.877749000 | -35.436626000 | 195.429912000 |
| C | -31.935591000 | -35.967611000 | 194.072817000 |
| H | -31.190723000 | -35.442656000 | 193.449429000 |
| H | -21.516057000 | -41.187718000 | 202.032943000 |
| C | -22.352883000 | -41.458335000 | 202.717392000 |
| C | -22.688654000 | -42.927753000 | 202.652669000 |
| O | -23.323824000 | -43.495408000 | 203.571757000 |
| C | -23.586727000 | -40.554946000 | 202.444550000 |
| C | -23.141179000 | -39.083762000 | 202.402882000 |
| C | -24.236775000 | -38.025464000 | 202.486708000 |
| O | -25.348394000 | -38.130984000 | 201.922081000 |
| O | -23.857230000 | -36.974162000 | 203.166256000 |
| N | -22.292926000 | -43.576498000 | 201.524814000 |
| C | -22.629343000 | -44.962153000 | 201.252063000 |
| H | -21.726399000 | -45.520632000 | 200.924621000 |
| C | -23.761239000 | -45.135771000 | 200.219743000 |
| C | -25.015989000 | -44.390940000 | 200.571175000 |
| C | -25.974834000 | -43.776509000 | 199.780009000 |
| N | -25.452286000 | -44.189343000 | 201.875512000 |
| C | -26.598528000 | -43.457855000 | 201.837495000 |
| N | -26.954228000 | -43.207116000 | 200.578389000 |
| H | -19.262626000 | -31.517297000 | 202.779917000 |
| C | -20.112713000 | -31.328697000 | 202.090235000 |
| C | -21.149854000 | -30.540551000 | 202.875488000 |
| O | -21.399687000 | -30.781991000 | 204.076726000 |
| C | -20.727448000 | -32.617533000 | 201.484341000 |
| C | -21.603771000 | -33.364995000 | 202.434951000 |
| C | -22.949805000 | -33.689181000 | 202.399540000 |
| N | -21.147270000 | -33.847241000 | 203.653763000 |
| C | -22.169704000 | -34.432345000 | 204.315496000 |
| N | -23.278064000 | -34.354560000 | 203.571150000 |
| N | -21.818504000 | -29.595735000 | 202.168030000 |
| C | -22.896307000 | -28.815019000 | 202.759171000 |
| H | -22.557559000 | -28.453986000 | 203.752878000 |
| C | -24.184268000 | -29.641277000 | 202.971182000 |
| C | -24.796375000 | -30.155241000 | 201.668799000 |
| C | -25.739369000 | -31.337465000 | 201.796240000 |
| O | -26.049305000 | -31.814380000 | 202.932704000 |
| O | -26.160191000 | -31.804977000 | 200.675168000 |
| H | -24.756904000 | -28.988023000 | 209.222079000 |
| C | -25.289739000 | -29.704836000 | 209.874338000 |
| H | -25.215628000 | -29.314217000 | 210.902923000 |
| C | -24.703126000 | -31.127082000 | 209.714891000 |
| C | -24.643848000 | -31.603779000 | 208.288588000 |
| C | -25.421829000 | -32.493502000 | 207.564473000 |
| N | -23.684949000 | -31.153090000 | 207.381664000 |
| C | -23.861170000 | -31.735300000 | 206.175938000 |

|   |               |               |               |
|---|---------------|---------------|---------------|
| N | -24.919725000 | -32.547198000 | 206.273698000 |
| H | -24.708982000 | -37.374838000 | 210.156821000 |
| C | -25.333665000 | -37.110846000 | 209.273415000 |
| C | -26.272480000 | -38.261245000 | 208.926982000 |
| O | -25.949245000 | -39.183230000 | 208.154191000 |
| C | -24.393471000 | -36.744128000 | 208.121293000 |
| C | -25.001579000 | -36.081328000 | 206.885974000 |
| O | -26.258092000 | -35.813312000 | 206.862734000 |
| O | -24.185737000 | -35.837004000 | 205.941125000 |
| N | -27.497581000 | -38.233001000 | 209.528726000 |
| C | -28.420988000 | -39.357108000 | 209.469748000 |
| C | -29.329386000 | -39.472065000 | 208.238229000 |
| O | -29.999316000 | -40.505140000 | 208.057882000 |
| N | -29.362704000 | -38.394138000 | 207.429469000 |
| C | -30.064667000 | -38.367948000 | 206.150496000 |
| C | -29.335309000 | -37.392753000 | 205.217098000 |
| O | -29.511298000 | -37.451155000 | 203.986147000 |
| O | -28.608140000 | -36.521866000 | 205.859103000 |
| O | -25.253464000 | -37.678636000 | 197.391097000 |
| O | -27.341178000 | -35.771581000 | 197.454818000 |
| O | -26.491370000 | -30.086025000 | 197.957106000 |
| O | -24.455211000 | -31.774406000 | 198.402986000 |
| O | -29.677796000 | -30.336582000 | 202.762978000 |
| O | -25.907164000 | -39.257528000 | 199.537879000 |
| O | -25.713065000 | -39.004887000 | 205.250471000 |
| H | -30.283747000 | -30.689517000 | 208.999849000 |
| C | -30.997751000 | -31.051074000 | 208.236197000 |
| H | -31.843803000 | -31.521736000 | 208.767318000 |
| C | -30.342199000 | -32.092929000 | 207.311834000 |
| C | -29.012266000 | -31.608422000 | 206.703323000 |
| C | -28.368526000 | -32.637268000 | 205.792217000 |
| O | -28.120294000 | -33.801788000 | 206.275153000 |
| O | -28.099171000 | -32.266822000 | 204.600890000 |
| H | -36.634947000 | -31.778024000 | 206.856128000 |
| C | -36.971479000 | -32.276075000 | 205.926511000 |
| C | -35.762975000 | -32.793234000 | 205.120723000 |
| C | -34.714703000 | -33.496121000 | 206.005229000 |
| C | -33.617480000 | -34.257984000 | 205.248833000 |
| N | -32.858641000 | -33.389796000 | 204.340958000 |
| C | -31.663379000 | -33.718543000 | 203.789790000 |
| N | -31.042445000 | -34.857789000 | 204.107772000 |
| N | -31.087561000 | -32.875626000 | 202.913364000 |
| O | -27.524011000 | -29.344132000 | 204.201481000 |
| H | -32.039498000 | -41.475070000 | 195.940672000 |
| H | -32.637617000 | -42.843029000 | 196.887545000 |
| H | -33.700323000 | -42.030393000 | 195.723193000 |
| H | -34.035420000 | -41.302483000 | 198.299000000 |
| H | -33.568609000 | -39.911283000 | 197.286050000 |
| H | -31.305259000 | -38.894279000 | 197.465627000 |
| H | -28.964854000 | -38.983794000 | 198.280355000 |
| H | -29.822426000 | -42.675038000 | 200.379633000 |
| H | -32.190068000 | -42.574975000 | 199.587580000 |
| H | -27.660585000 | -41.907752000 | 200.038244000 |
| H | -26.011535000 | -43.702084000 | 198.690734000 |
| H | -27.123664000 | -43.120388000 | 202.732657000 |
| H | -28.722009000 | -37.612810000 | 207.598913000 |
| H | -27.712107000 | -37.464697000 | 210.162046000 |
| H | -21.561567000 | -29.431892000 | 201.196852000 |
| H | -21.823328000 | -43.037865000 | 200.798411000 |
| H | -22.924985000 | -45.411418000 | 202.216737000 |
| H | -23.964352000 | -46.221899000 | 200.126629000 |
| H | -23.425389000 | -44.795971000 | 199.222849000 |
| H | -22.582052000 | -38.883046000 | 201.465961000 |
| H | -24.076915000 | -40.838358000 | 201.493657000 |
| H | -21.991497000 | -41.255835000 | 203.743161000 |
| H | -22.439299000 | -38.878312000 | 203.230105000 |
| H | -24.334258000 | -40.696900000 | 203.246445000 |
| H | -26.353586000 | -29.688934000 | 209.577137000 |
| H | -26.276617000 | -33.105119000 | 207.855845000 |
| H | -23.223311000 | -31.573611000 | 205.300794000 |
| H | -23.694828000 | -33.523383000 | 201.618871000 |
| H | -22.100483000 | -34.920158000 | 205.287596000 |
| H | -19.698222000 | -30.722230000 | 201.264144000 |

|   |               |               |               |
|---|---------------|---------------|---------------|
| H | -23.080508000 | -27.940476000 | 202.112902000 |
| H | -29.874984000 | -34.523239000 | 197.390108000 |
| H | -32.803468000 | -34.325344000 | 197.932865000 |
| H | -32.929048000 | -31.326785000 | 196.689435000 |
| H | -32.201945000 | -34.481084000 | 195.573062000 |
| H | -30.756179000 | -28.070371000 | 201.419329000 |
| H | -19.913682000 | -33.269081000 | 201.113233000 |
| H | -21.340296000 | -32.350896000 | 200.605194000 |
| H | -25.926583000 | -36.227247000 | 209.575196000 |
| H | -30.009327000 | -39.373400000 | 205.693853000 |
| C | -31.542664000 | -37.954590000 | 206.293096000 |
| H | -32.038280000 | -37.966297000 | 205.306084000 |
| H | -32.067476000 | -38.666292000 | 206.952355000 |
| H | -31.619045000 | -36.944516000 | 206.735744000 |
| H | -29.080999000 | -39.308831000 | 210.353453000 |
| H | -27.858742000 | -40.306732000 | 209.536504000 |
| H | -23.594640000 | -36.069214000 | 208.480370000 |
| H | -23.880891000 | -37.650572000 | 207.748225000 |
| H | -30.041200000 | -36.762684000 | 198.664039000 |
| H | -31.570623000 | -36.180236000 | 199.346237000 |
| H | -31.368066000 | -30.175594000 | 207.673207000 |
| H | -30.151554000 | -33.028965000 | 207.869661000 |
| H | -28.289004000 | -31.397584000 | 207.516918000 |
| H | -31.039972000 | -32.359600000 | 206.492318000 |
| H | -29.137006000 | -30.677416000 | 206.123650000 |
| H | -28.175234000 | -26.355909000 | 201.143305000 |
| H | -28.456538000 | -27.567079000 | 202.413159000 |
| H | -25.304025000 | -31.855094000 | 210.288101000 |
| H | -23.680971000 | -31.164495000 | 210.138374000 |
| H | -25.338228000 | -33.157303000 | 205.473420000 |
| H | -37.548238000 | -31.526089000 | 205.357493000 |
| H | -35.291062000 | -31.937959000 | 204.595727000 |
| H | -35.219619000 | -34.234997000 | 206.657331000 |
| H | -32.909794000 | -34.690001000 | 205.981178000 |
| H | -37.646932000 | -33.100899000 | 206.217125000 |
| H | -36.108683000 | -33.487679000 | 204.328549000 |
| H | -34.245182000 | -32.753051000 | 206.680207000 |
| H | -33.377344000 | -32.654460000 | 203.862509000 |
| H | -34.067903000 | -35.099373000 | 204.680830000 |
| H | -31.226378000 | -31.863919000 | 202.995351000 |
| H | -31.546737000 | -35.657041000 | 204.476957000 |
| H | -30.168919000 | -33.117489000 | 202.494591000 |
| H | -30.033377000 | -34.971280000 | 203.855010000 |
| H | -23.935490000 | -30.499027000 | 203.617853000 |
| H | -25.366611000 | -29.369326000 | 201.132781000 |
| H | -24.925255000 | -29.032450000 | 203.520295000 |
| H | -24.001646000 | -30.473958000 | 200.964374000 |
| H | -20.207856000 | -33.719617000 | 204.026436000 |
| H | -25.825368000 | -33.108407000 | 198.633649000 |
| H | -29.163389000 | -31.979701000 | 198.716295000 |
| H | -28.583030000 | -30.788902000 | 199.736751000 |
| H | -29.578928000 | -29.905471000 | 201.861733000 |
| H | -29.156371000 | -31.172050000 | 202.591688000 |
| H | -27.041979000 | -30.194296000 | 204.230685000 |
| H | -28.361717000 | -29.623359000 | 203.733130000 |
| H | -32.942481000 | -35.820139000 | 193.649354000 |
| H | -31.697971000 | -37.042558000 | 194.096594000 |
| H | -26.660429000 | -39.918686000 | 199.601477000 |
| H | -25.685816000 | -38.995368000 | 200.476170000 |
| H | -27.606033000 | -36.553907000 | 198.890204000 |
| H | -26.528053000 | -36.323374000 | 197.314141000 |
| H | -27.019765000 | -34.950324000 | 197.946386000 |
| H | -25.359198000 | -38.257066000 | 196.612831000 |
| H | -25.464632000 | -38.275899000 | 198.165106000 |
| H | -27.118719000 | -37.907345000 | 199.558177000 |
| H | -24.607901000 | -31.840190000 | 199.367178000 |
| H | -25.122651000 | -31.048115000 | 198.173885000 |
| H | -27.128351000 | -30.793063000 | 198.234041000 |
| H | -26.631303000 | -29.406068000 | 198.688377000 |
| H | -25.869115000 | -38.921090000 | 206.216084000 |
| H | -26.004128000 | -38.135076000 | 204.870183000 |
| H | -24.874981000 | -44.326621000 | 202.718946000 |
| H | -22.937833000 | -30.491394000 | 207.593398000 |

|   |               |               |               |
|---|---------------|---------------|---------------|
| C | -27.742730000 | -40.235431000 | 202.585170000 |
| H | -27.527773000 | -40.052139000 | 203.671299000 |
| H | -28.390710000 | -41.147682000 | 202.508817000 |
| H | -26.742656000 | -40.514212000 | 202.160171000 |

W5-1

|    |               |               |               |
|----|---------------|---------------|---------------|
| Mn | -24.826227000 | -35.561452000 | 203.954852000 |
| Mn | -27.282351000 | -35.234995000 | 205.240967000 |
| Mn | -27.271141000 | -33.344946000 | 203.140932000 |
| Mn | -27.575926000 | -33.173159000 | 200.425495000 |
| Ca | -27.894722000 | -36.726960000 | 202.214214000 |
| O  | -26.398955000 | -36.528418000 | 204.232819000 |
| O  | -28.292634000 | -34.754500000 | 203.790727000 |
| O  | -25.948571000 | -34.080619000 | 204.490744000 |
| O  | -28.460813000 | -32.607050000 | 202.016812000 |
| O  | -26.731848000 | -34.306795000 | 201.674071000 |
| O  | -28.451235000 | -31.652871000 | 199.412525000 |
| O  | -26.606467000 | -33.729911000 | 198.959285000 |
| O  | -27.630953000 | -37.260419000 | 199.899901000 |
| O  | -28.048809000 | -39.132049000 | 202.509159000 |
| H  | -30.446114000 | -26.826764000 | 200.173820000 |
| C  | -30.241434000 | -27.113395000 | 201.222163000 |
| H  | -30.724377000 | -26.361921000 | 201.871645000 |
| C  | -28.728478000 | -27.288978000 | 201.449319000 |
| C  | -28.165682000 | -28.487969000 | 200.664269000 |
| O  | -28.763833000 | -29.624581000 | 200.874428000 |
| O  | -27.187993000 | -28.325469000 | 199.884681000 |
| C  | -32.924381000 | -41.850903000 | 196.489835000 |
| C  | -31.513828000 | -41.561243000 | 195.943064000 |
| C  | -30.524241000 | -41.369146000 | 197.081222000 |
| C  | -29.958981000 | -42.482541000 | 197.741319000 |
| C  | -30.202248000 | -40.083787000 | 197.571596000 |
| C  | -29.100915000 | -42.330556000 | 198.843739000 |
| C  | -29.343939000 | -39.911497000 | 198.670836000 |
| C  | -28.787596000 | -41.035522000 | 199.312610000 |
| O  | -27.917988000 | -40.834918000 | 200.370144000 |
| H  | -33.785375000 | -32.318034000 | 197.913159000 |
| C  | -32.844739000 | -31.791422000 | 197.688620000 |
| C  | -31.613947000 | -32.672209000 | 197.724643000 |
| O  | -30.463710000 | -32.186462000 | 197.668022000 |
| H  | -32.712245000 | -30.956595000 | 198.397171000 |
| N  | -31.847058000 | -34.014985000 | 197.749483000 |
| C  | -30.825021000 | -35.049751000 | 197.612821000 |
| C  | -31.084606000 | -35.967337000 | 196.396129000 |
| O  | -30.559794000 | -37.087239000 | 196.313148000 |
| C  | -30.618482000 | -35.851787000 | 198.908365000 |
| C  | -29.804729000 | -35.206615000 | 200.037791000 |
| O  | -29.859016000 | -35.709341000 | 201.185069000 |
| O  | -29.028454000 | -34.226870000 | 199.689173000 |
| N  | -31.869343000 | -35.425648000 | 195.425655000 |
| C  | -31.935591000 | -35.967611000 | 194.072817000 |
| H  | -31.190723000 | -35.442656000 | 193.449429000 |
| H  | -21.516057000 | -41.187718000 | 202.032943000 |
| C  | -22.352883000 | -41.458335000 | 202.717392000 |
| C  | -22.770408000 | -42.910635000 | 202.613877000 |
| O  | -23.538256000 | -43.430744000 | 203.443981000 |
| C  | -23.556591000 | -40.514013000 | 202.460587000 |
| C  | -23.070606000 | -39.057766000 | 202.334185000 |
| C  | -24.148942000 | -37.992872000 | 202.482856000 |
| O  | -25.234068000 | -38.019529000 | 201.855681000 |
| O  | -23.810018000 | -37.036107000 | 203.306003000 |
| N  | -22.260239000 | -43.592986000 | 201.548195000 |
| C  | -22.629343000 | -44.962153000 | 201.252063000 |
| H  | -21.726399000 | -45.520632000 | 200.924621000 |
| C  | -23.738170000 | -45.085426000 | 200.181026000 |
| C  | -24.990501000 | -44.395957000 | 200.606755000 |
| C  | -25.520032000 | -43.162465000 | 200.269185000 |
| N  | -25.823540000 | -44.877557000 | 201.607084000 |
| C  | -26.799162000 | -43.962772000 | 201.846682000 |
| N  | -26.639179000 | -42.912752000 | 201.043544000 |
| H  | -19.262626000 | -31.517297000 | 202.779917000 |
| C  | -20.112713000 | -31.328697000 | 202.090235000 |

|   |               |               |               |
|---|---------------|---------------|---------------|
| C | -21.161721000 | -30.556401000 | 202.873983000 |
| O | -21.439145000 | -30.828855000 | 204.063039000 |
| C | -20.712020000 | -32.622214000 | 201.477320000 |
| C | -21.574519000 | -33.386365000 | 202.427280000 |
| C | -22.917668000 | -33.722087000 | 202.399430000 |
| N | -21.105987000 | -33.865573000 | 203.642588000 |
| C | -22.116078000 | -34.457898000 | 204.312648000 |
| N | -23.231847000 | -34.388728000 | 203.575314000 |
| N | -21.811984000 | -29.594573000 | 202.175836000 |
| C | -22.896307000 | -28.815019000 | 202.759171000 |
| H | -22.557559000 | -28.453986000 | 203.752878000 |
| C | -24.197534000 | -29.623328000 | 202.930569000 |
| C | -24.702233000 | -30.235056000 | 201.623101000 |
| C | -25.703592000 | -31.365547000 | 201.765984000 |
| O | -25.967339000 | -31.853159000 | 202.914618000 |
| O | -26.197355000 | -31.791507000 | 200.666287000 |
| H | -24.831897000 | -28.949505000 | 209.209068000 |
| C | -25.289739000 | -29.704836000 | 209.874338000 |
| H | -25.215628000 | -29.314217000 | 210.902923000 |
| C | -24.597795000 | -31.076069000 | 209.702806000 |
| C | -24.535944000 | -31.553849000 | 208.278317000 |
| C | -25.307134000 | -32.454186000 | 207.561422000 |
| N | -23.579229000 | -31.103757000 | 207.368916000 |
| C | -23.744022000 | -31.698593000 | 206.168392000 |
| N | -24.796320000 | -32.518846000 | 206.274622000 |
| H | -24.708982000 | -37.374838000 | 210.156821000 |
| C | -25.333665000 | -37.110846000 | 209.273415000 |
| C | -26.306045000 | -38.218868000 | 208.873862000 |
| O | -26.056629000 | -39.045954000 | 207.975619000 |
| C | -24.372305000 | -36.727012000 | 208.148868000 |
| C | -24.958455000 | -36.057418000 | 206.913703000 |
| O | -26.205338000 | -35.738380000 | 206.893609000 |
| O | -24.141185000 | -35.850512000 | 205.962056000 |
| N | -27.489056000 | -38.237831000 | 209.557211000 |
| C | -28.420988000 | -39.357108000 | 209.469748000 |
| C | -29.304014000 | -39.439512000 | 208.216942000 |
| O | -29.905439000 | -40.493619000 | 207.947892000 |
| N | -29.405496000 | -38.302489000 | 207.492958000 |
| C | -30.100963000 | -38.231691000 | 206.212498000 |
| C | -29.365804000 | -37.252016000 | 205.292357000 |
| O | -29.576368000 | -37.257080000 | 204.067936000 |
| O | -28.581954000 | -36.428016000 | 205.939559000 |
| O | -25.510900000 | -37.806842000 | 197.290302000 |
| O | -27.505525000 | -35.872806000 | 197.698484000 |
| O | -26.576805000 | -30.201056000 | 198.005350000 |
| O | -24.601702000 | -31.957465000 | 198.201391000 |
| O | -29.071370000 | -29.894443000 | 203.554561000 |
| O | -25.762793000 | -39.347033000 | 199.589203000 |
| O | -26.814052000 | -39.068562000 | 205.079465000 |
| H | -30.307779000 | -30.644744000 | 208.999068000 |
| C | -30.997751000 | -31.051074000 | 208.236197000 |
| H | -31.843803000 | -31.521736000 | 208.767318000 |
| C | -30.299997000 | -32.104377000 | 207.359818000 |
| C | -28.995092000 | -31.574981000 | 206.736777000 |
| C | -28.302146000 | -32.580292000 | 205.840883000 |
| O | -28.039249000 | -33.739028000 | 206.324710000 |
| O | -28.001259000 | -32.209935000 | 204.654649000 |
| H | -36.690166000 | -31.806964000 | 206.888578000 |
| C | -36.971479000 | -32.276075000 | 205.926511000 |
| C | -35.719777000 | -32.706623000 | 205.139906000 |
| C | -34.699285000 | -33.474573000 | 205.999386000 |
| C | -33.545853000 | -34.110915000 | 205.213880000 |
| N | -32.764065000 | -33.110107000 | 204.476204000 |
| C | -31.554004000 | -33.353117000 | 203.917937000 |
| N | -30.991706000 | -34.563730000 | 204.012898000 |
| N | -30.896875000 | -32.362410000 | 203.291218000 |
| O | -26.977820000 | -28.489714000 | 204.689506000 |
| H | -32.902540000 | -42.744041000 | 197.142993000 |
| H | -33.269870000 | -41.006452000 | 197.116021000 |
| H | -33.700323000 | -42.030393000 | 195.723193000 |
| H | -31.532703000 | -40.655313000 | 195.307737000 |
| H | -31.184650000 | -42.397500000 | 195.295725000 |
| H | -30.192800000 | -43.496466000 | 197.386818000 |

|   |               |               |               |
|---|---------------|---------------|---------------|
| H | -28.669293000 | -43.210883000 | 199.334362000 |
| H | -29.079719000 | -38.909501000 | 199.032887000 |
| H | -30.607896000 | -39.188991000 | 197.081406000 |
| H | -27.459961000 | -41.761558000 | 200.709203000 |
| H | -25.170743000 | -42.446912000 | 199.522002000 |
| H | -27.591879000 | -44.096602000 | 202.584455000 |
| H | -28.806205000 | -37.506879000 | 207.727978000 |
| H | -27.636144000 | -37.546584000 | 210.291042000 |
| H | -21.520016000 | -29.397648000 | 201.220746000 |
| H | -21.679159000 | -43.089402000 | 200.880612000 |
| H | -22.969786000 | -45.418211000 | 202.198279000 |
| H | -23.922260000 | -46.159445000 | 199.986701000 |
| H | -23.393599000 | -44.639791000 | 199.230770000 |
| H | -22.599973000 | -38.903312000 | 201.342489000 |
| H | -24.092121000 | -40.817768000 | 201.541522000 |
| H | -21.981136000 | -41.292725000 | 203.746141000 |
| H | -22.293298000 | -38.847822000 | 203.089037000 |
| H | -24.279534000 | -40.611559000 | 203.291100000 |
| H | -26.359697000 | -29.772524000 | 209.607881000 |
| H | -26.158631000 | -33.067490000 | 207.858027000 |
| H | -23.106336000 | -31.533841000 | 205.291483000 |
| H | -23.669525000 | -33.561506000 | 201.624375000 |
| H | -22.033419000 | -34.942674000 | 205.285196000 |
| H | -19.700539000 | -30.716156000 | 201.267913000 |
| H | -23.059100000 | -27.935804000 | 202.113125000 |
| H | -29.872864000 | -34.528500000 | 197.388878000 |
| H | -32.809971000 | -34.324867000 | 197.884325000 |
| H | -32.918019000 | -31.353660000 | 196.676275000 |
| H | -32.161005000 | -34.457516000 | 195.554539000 |
| H | -30.756633000 | -28.073945000 | 201.404691000 |
| H | -19.890777000 | -33.260665000 | 201.100522000 |
| H | -21.330475000 | -32.359028000 | 200.601153000 |
| H | -25.918008000 | -36.224110000 | 209.585157000 |
| H | -30.047025000 | -39.226381000 | 205.732918000 |
| C | -31.576694000 | -37.811001000 | 206.358463000 |
| H | -32.067004000 | -37.789468000 | 205.369490000 |
| H | -32.107631000 | -38.537886000 | 206.995711000 |
| H | -31.649851000 | -36.812350000 | 206.825684000 |
| H | -29.094356000 | -39.311804000 | 210.342927000 |
| H | -27.858742000 | -40.306732000 | 209.536504000 |
| H | -23.590371000 | -36.045898000 | 208.533853000 |
| H | -23.838385000 | -37.621660000 | 207.779030000 |
| H | -30.041932000 | -36.759850000 | 198.644303000 |
| H | -31.579525000 | -36.197988000 | 199.328959000 |
| H | -31.379203000 | -30.205437000 | 207.636125000 |
| H | -30.068655000 | -33.007745000 | 207.953900000 |
| H | -28.279653000 | -31.317774000 | 207.543650000 |
| H | -30.983350000 | -32.430724000 | 206.550974000 |
| H | -29.176186000 | -30.657133000 | 206.151467000 |
| H | -28.164788000 | -26.385360000 | 201.160131000 |
| H | -28.524571000 | -27.475559000 | 202.521425000 |
| H | -25.125466000 | -31.845482000 | 210.293801000 |
| H | -23.565787000 | -31.031774000 | 210.099902000 |
| H | -25.214562000 | -33.128127000 | 205.490101000 |
| H | -37.548238000 | -31.526089000 | 205.357493000 |
| H | -35.241560000 | -31.800832000 | 204.713889000 |
| H | -35.211963000 | -34.296252000 | 206.535616000 |
| H | -32.864247000 | -34.629003000 | 205.914864000 |
| H | -37.626429000 | -33.137257000 | 206.150971000 |
| H | -36.018097000 | -33.331076000 | 204.273668000 |
| H | -34.286625000 | -32.802276000 | 206.777822000 |
| H | -33.255860000 | -32.280160000 | 204.148015000 |
| H | -33.948127000 | -34.871395000 | 204.511728000 |
| H | -31.089323000 | -31.385342000 | 203.507531000 |
| H | -31.548596000 | -35.399047000 | 204.163343000 |
| H | -30.016038000 | -32.548266000 | 202.760380000 |
| H | -29.976608000 | -34.691267000 | 203.802774000 |
| H | -24.017969000 | -30.429665000 | 203.659878000 |
| H | -25.165801000 | -29.484223000 | 200.953940000 |
| H | -24.978393000 | -28.970855000 | 203.361591000 |
| H | -23.852225000 | -30.667735000 | 201.054781000 |
| H | -20.164234000 | -33.732165000 | 204.008272000 |
| H | -25.842328000 | -33.131835000 | 198.704585000 |



|   |               |               |               |
|---|---------------|---------------|---------------|
| H | -29.265411000 | -31.902142000 | 198.885674000 |
| H | -28.608873000 | -30.788820000 | 200.031398000 |
| H | -29.015874000 | -29.865740000 | 202.551019000 |
| H | -28.686365000 | -30.770600000 | 203.795473000 |
| H | -27.751605000 | -28.956608000 | 204.260391000 |
| H | -32.943275000 | -35.821170000 | 193.651051000 |
| H | -31.697858000 | -37.042061000 | 194.102631000 |
| H | -26.515696000 | -39.956641000 | 199.831002000 |
| H | -25.460620000 | -38.963824000 | 200.466278000 |
| H | -27.685040000 | -39.503536000 | 203.346333000 |
| H | -27.660298000 | -36.685259000 | 199.051107000 |
| H | -26.728210000 | -36.419397000 | 197.410312000 |
| H | -27.120104000 | -35.026437000 | 198.090971000 |
| H | -25.755819000 | -38.368540000 | 196.531111000 |
| H | -25.587398000 | -38.413639000 | 198.076525000 |
| H | -28.021890000 | -39.825094000 | 201.798637000 |
| H | -26.985692000 | -37.976194000 | 199.675358000 |
| H | -24.208555000 | -31.805270000 | 199.079531000 |
| H | -25.279826000 | -31.199829000 | 198.128859000 |
| H | -27.248906000 | -30.864424000 | 198.310857000 |
| H | -26.694738000 | -29.499663000 | 198.717273000 |
| H | -26.737274000 | -39.118207000 | 206.057934000 |
| H | -26.535524000 | -38.137684000 | 204.856047000 |
| H | -25.698147000 | -45.749879000 | 202.118271000 |
| H | -22.832647000 | -30.441212000 | 207.580672000 |
| C | -26.369793000 | -29.405657000 | 205.604565000 |
| H | -26.947178000 | -29.507224000 | 206.548383000 |
| H | -26.242687000 | -30.412328000 | 205.159873000 |
| H | -25.368715000 | -29.015948000 | 205.866792000 |

W6-1

|    |               |               |               |
|----|---------------|---------------|---------------|
| Mn | -24.835153000 | -35.563086000 | 203.952062000 |
| Mn | -27.301401000 | -35.256342000 | 205.232627000 |
| Mn | -27.289971000 | -33.372026000 | 203.138428000 |
| Mn | -27.532571000 | -33.232144000 | 200.418162000 |
| Ca | -27.866454000 | -36.750337000 | 202.194607000 |
| O  | -26.395807000 | -36.545603000 | 204.228645000 |
| O  | -28.308197000 | -34.790624000 | 203.776997000 |
| O  | -25.969698000 | -34.094598000 | 204.497284000 |
| O  | -28.448177000 | -32.669514000 | 201.970156000 |
| O  | -26.700328000 | -34.348913000 | 201.681002000 |
| O  | -28.452713000 | -31.709574000 | 199.422833000 |
| O  | -26.562616000 | -33.767275000 | 198.935588000 |
| O  | -27.622538000 | -37.287191000 | 199.875024000 |
| O  | -27.989909000 | -39.156178000 | 202.482376000 |
| H  | -30.265174000 | -26.722092000 | 200.188164000 |
| C  | -30.241434000 | -27.113395000 | 201.222163000 |
| H  | -30.724377000 | -26.361921000 | 201.871645000 |
| C  | -28.799088000 | -27.457082000 | 201.630230000 |
| C  | -28.277611000 | -28.673663000 | 200.854098000 |
| O  | -28.997488000 | -29.751655000 | 200.956104000 |
| O  | -27.226499000 | -28.570111000 | 200.164607000 |
| C  | -32.924381000 | -41.850903000 | 196.489835000 |
| C  | -31.515057000 | -41.569700000 | 195.935577000 |
| C  | -30.519489000 | -41.380875000 | 197.068335000 |
| C  | -29.958530000 | -42.496775000 | 197.727650000 |
| C  | -30.189708000 | -40.096594000 | 197.556084000 |
| C  | -29.097456000 | -42.348366000 | 198.827972000 |
| C  | -29.328643000 | -39.927809000 | 198.653593000 |
| C  | -28.777458000 | -41.054475000 | 199.295214000 |
| O  | -27.906444000 | -40.858110000 | 200.351629000 |
| H  | -33.785375000 | -32.318034000 | 197.913159000 |
| C  | -32.844739000 | -31.791422000 | 197.688620000 |
| C  | -31.615355000 | -32.674713000 | 197.725775000 |
| O  | -30.464340000 | -32.190496000 | 197.668900000 |
| H  | -32.711184000 | -30.957176000 | 198.397550000 |
| N  | -31.848417000 | -34.017306000 | 197.753689000 |
| C  | -30.825021000 | -35.049751000 | 197.612821000 |
| C  | -31.083141000 | -35.964632000 | 196.393295000 |
| O  | -30.555052000 | -37.082804000 | 196.307290000 |
| C  | -30.618291000 | -35.862832000 | 198.903098000 |
| C  | -29.784635000 | -35.237945000 | 200.028781000 |

|   |               |               |               |
|---|---------------|---------------|---------------|
| O | -29.852456000 | -35.728562000 | 201.181062000 |
| O | -28.974352000 | -34.291895000 | 199.667171000 |
| N | -31.870942000 | -35.424395000 | 195.424982000 |
| C | -31.935591000 | -35.967611000 | 194.072817000 |
| H | -31.190723000 | -35.442656000 | 193.449429000 |
| H | -21.516057000 | -41.187718000 | 202.032943000 |
| C | -22.352883000 | -41.458335000 | 202.717392000 |
| C | -22.774357000 | -42.909209000 | 202.610512000 |
| O | -23.545253000 | -43.428689000 | 203.438180000 |
| C | -23.552958000 | -40.508681000 | 202.462045000 |
| C | -23.060349000 | -39.054582000 | 202.333816000 |
| C | -24.135981000 | -37.985112000 | 202.472291000 |
| O | -25.213201000 | -38.007566000 | 201.830682000 |
| O | -23.804912000 | -37.031142000 | 203.300857000 |
| N | -22.263831000 | -43.591613000 | 201.544895000 |
| C | -22.629343000 | -44.962153000 | 201.252063000 |
| H | -21.726399000 | -45.520632000 | 200.924621000 |
| C | -23.736481000 | -45.093730000 | 200.180459000 |
| C | -24.993656000 | -44.413549000 | 200.604956000 |
| C | -25.526232000 | -43.180153000 | 200.272961000 |
| N | -25.828911000 | -44.904761000 | 201.598734000 |
| C | -26.809453000 | -43.995399000 | 201.839546000 |
| N | -26.649711000 | -42.939935000 | 201.043710000 |
| H | -19.262626000 | -31.517297000 | 202.779917000 |
| C | -20.112713000 | -31.328697000 | 202.090235000 |
| C | -21.154681000 | -30.546526000 | 202.873698000 |
| O | -21.423630000 | -30.808077000 | 204.066866000 |
| C | -20.720080000 | -32.619933000 | 201.481710000 |
| C | -21.587524000 | -33.376000000 | 202.433534000 |
| C | -22.928804000 | -33.718788000 | 202.399560000 |
| N | -21.124632000 | -33.842456000 | 203.655969000 |
| C | -22.136380000 | -34.434226000 | 204.324172000 |
| N | -23.247254000 | -34.377495000 | 203.578749000 |
| N | -21.808857000 | -29.587889000 | 202.172785000 |
| C | -22.896307000 | -28.815019000 | 202.759171000 |
| H | -22.557559000 | -28.453986000 | 203.752878000 |
| C | -24.183044000 | -29.649776000 | 202.948337000 |
| C | -24.716407000 | -30.238019000 | 201.640983000 |
| C | -25.698219000 | -31.387262000 | 201.774161000 |
| O | -25.993880000 | -31.856032000 | 202.924943000 |
| O | -26.152181000 | -31.844950000 | 200.670707000 |
| H | -24.801364000 | -28.965569000 | 209.212810000 |
| C | -25.289739000 | -29.704836000 | 209.874338000 |
| H | -25.215628000 | -29.314217000 | 210.902923000 |
| C | -24.634640000 | -31.096539000 | 209.717417000 |
| C | -24.571339000 | -31.577518000 | 208.294520000 |
| C | -25.355478000 | -32.460998000 | 207.570827000 |
| N | -23.610178000 | -31.131586000 | 207.388365000 |
| C | -23.787587000 | -31.710425000 | 206.181995000 |
| N | -24.851771000 | -32.516228000 | 206.280859000 |
| H | -24.708982000 | -37.374838000 | 210.156821000 |
| C | -25.333665000 | -37.110846000 | 209.273415000 |
| C | -26.302222000 | -38.222926000 | 208.874288000 |
| O | -26.043363000 | -39.059456000 | 207.987713000 |
| C | -24.375327000 | -36.723508000 | 208.148545000 |
| C | -24.968919000 | -36.059115000 | 206.913765000 |
| O | -26.219477000 | -35.756182000 | 206.892342000 |
| O | -24.150791000 | -35.842910000 | 205.964916000 |
| N | -27.491873000 | -38.235430000 | 209.546823000 |
| C | -28.420988000 | -39.357108000 | 209.469748000 |
| C | -29.307573000 | -39.458287000 | 208.221879000 |
| O | -29.909388000 | -40.516936000 | 207.971073000 |
| N | -29.406932000 | -38.335251000 | 207.478249000 |
| C | -30.083367000 | -38.293084000 | 206.186880000 |
| C | -29.345055000 | -37.313223000 | 205.270640000 |
| O | -29.531894000 | -37.335652000 | 204.042518000 |
| O | -28.591117000 | -36.467208000 | 205.923740000 |
| O | -25.476354000 | -37.884542000 | 197.256616000 |
| O | -27.450409000 | -35.911539000 | 197.670274000 |
| O | -26.595457000 | -30.195120000 | 198.085247000 |
| O | -24.580242000 | -31.917152000 | 198.210178000 |
| O | -30.128788000 | -29.992747000 | 203.395624000 |
| O | -25.740785000 | -39.373239000 | 199.587165000 |

|   |               |               |               |
|---|---------------|---------------|---------------|
| O | -26.785372000 | -39.086642000 | 205.078839000 |
| H | -30.299196000 | -30.658854000 | 208.998690000 |
| C | -30.997751000 | -31.051074000 | 208.236197000 |
| H | -31.843803000 | -31.521736000 | 208.767318000 |
| C | -30.312886000 | -32.098219000 | 207.338310000 |
| C | -29.004132000 | -31.586761000 | 206.704857000 |
| C | -28.326716000 | -32.608221000 | 205.809731000 |
| O | -28.075497000 | -33.771343000 | 206.307270000 |
| O | -28.030285000 | -32.246352000 | 204.626611000 |
| H | -36.712541000 | -31.810851000 | 206.896934000 |
| C | -36.971479000 | -32.276075000 | 205.926511000 |
| C | -35.697982000 | -32.698005000 | 205.168236000 |
| C | -34.681591000 | -33.427260000 | 206.067936000 |
| C | -33.536703000 | -34.128021000 | 205.326408000 |
| N | -32.726683000 | -33.194240000 | 204.531854000 |
| C | -31.557337000 | -33.541729000 | 203.930487000 |
| N | -31.049849000 | -34.770299000 | 204.092642000 |
| N | -30.899122000 | -32.644373000 | 203.185318000 |
| O | -27.496599000 | -29.418388000 | 204.247184000 |
| H | -32.904587000 | -42.741720000 | 197.146085000 |
| H | -33.265048000 | -41.002145000 | 197.112665000 |
| H | -33.700323000 | -42.030393000 | 195.723193000 |
| H | -31.532814000 | -40.665118000 | 195.298297000 |
| H | -31.193802000 | -42.409066000 | 195.288273000 |
| H | -30.198724000 | -43.509580000 | 197.374245000 |
| H | -28.669090000 | -43.230216000 | 199.318734000 |
| H | -29.059163000 | -38.927010000 | 199.015060000 |
| H | -30.592841000 | -39.200316000 | 197.066369000 |
| H | -27.462178000 | -41.787613000 | 200.700268000 |
| H | -25.176037000 | -42.458071000 | 199.532473000 |
| H | -27.605249000 | -44.137206000 | 202.572485000 |
| H | -28.805891000 | -37.536545000 | 207.698244000 |
| H | -27.645928000 | -37.534724000 | 210.270147000 |
| H | -21.529599000 | -29.401805000 | 201.211752000 |
| H | -21.678594000 | -43.089681000 | 200.879738000 |
| H | -22.968945000 | -45.416959000 | 202.199203000 |
| H | -23.912429000 | -46.169203000 | 199.986674000 |
| H | -23.394209000 | -44.646148000 | 199.230288000 |
| H | -22.583427000 | -38.906039000 | 201.344204000 |
| H | -24.090419000 | -40.810334000 | 201.543347000 |
| H | -21.980131000 | -41.296234000 | 203.746325000 |
| H | -22.286926000 | -38.845401000 | 203.092938000 |
| H | -24.275803000 | -40.601995000 | 203.293201000 |
| H | -26.357717000 | -29.743155000 | 209.595042000 |
| H | -26.215177000 | -33.065369000 | 207.862211000 |
| H | -23.147344000 | -31.549939000 | 205.307267000 |
| H | -23.676847000 | -33.569773000 | 201.618331000 |
| H | -22.058223000 | -34.910267000 | 205.301400000 |
| H | -19.698323000 | -30.720869000 | 201.265370000 |
| H | -23.077969000 | -27.940323000 | 202.112627000 |
| H | -29.873266000 | -34.526756000 | 197.391585000 |
| H | -32.810768000 | -34.328402000 | 197.889544000 |
| H | -32.917179000 | -31.353892000 | 196.676170000 |
| H | -32.165661000 | -34.457259000 | 195.554142000 |
| H | -30.877667000 | -28.015202000 | 201.235757000 |
| H | -19.902699000 | -33.264831000 | 201.107296000 |
| H | -21.336202000 | -32.355814000 | 200.604172000 |
| H | -25.920589000 | -36.226203000 | 209.586185000 |
| H | -30.007540000 | -39.292650000 | 205.720570000 |
| C | -31.567094000 | -37.892250000 | 206.303048000 |
| H | -32.042998000 | -37.897965000 | 205.306621000 |
| H | -32.096907000 | -38.615878000 | 206.944887000 |
| H | -31.662911000 | -36.887202000 | 206.752410000 |
| H | -29.090332000 | -39.309625000 | 210.345883000 |
| H | -27.858742000 | -40.306732000 | 209.536504000 |
| H | -23.596608000 | -36.037733000 | 208.531509000 |
| H | -23.837555000 | -37.616033000 | 207.779088000 |
| H | -30.055799000 | -36.776511000 | 198.627302000 |
| H | -31.580440000 | -36.198957000 | 199.329002000 |
| H | -31.377401000 | -30.194189000 | 207.650444000 |
| H | -30.089756000 | -33.011045000 | 207.921446000 |
| H | -28.279929000 | -31.328384000 | 207.503957000 |
| H | -31.007433000 | -32.408338000 | 206.532321000 |

|   |               |               |               |
|---|---------------|---------------|---------------|
| H | -29.165722000 | -30.675743000 | 206.103816000 |
| H | -28.119212000 | -26.605946000 | 201.454997000 |
| H | -28.733973000 | -27.706818000 | 202.706086000 |
| H | -25.191167000 | -31.848551000 | 210.304340000 |
| H | -23.606601000 | -31.079632000 | 210.127017000 |
| H | -25.272742000 | -33.122589000 | 205.492996000 |
| H | -37.548238000 | -31.526089000 | 205.357493000 |
| H | -35.227003000 | -31.794894000 | 204.728977000 |
| H | -35.203675000 | -34.210292000 | 206.650812000 |
| H | -32.869720000 | -34.615807000 | 206.062395000 |
| H | -37.622703000 | -33.143864000 | 206.135772000 |
| H | -35.969802000 | -33.348156000 | 204.312381000 |
| H | -34.262156000 | -32.716731000 | 206.807656000 |
| H | -33.207890000 | -32.394155000 | 204.123585000 |
| H | -33.953835000 | -34.922183000 | 204.671008000 |
| H | -30.879261000 | -31.630880000 | 203.406506000 |
| H | -31.626336000 | -35.567381000 | 204.342067000 |
| H | -30.029127000 | -32.918711000 | 202.686032000 |
| H | -30.054666000 | -34.933517000 | 203.844225000 |
| H | -23.963156000 | -30.469967000 | 203.651087000 |
| H | -25.220583000 | -29.477513000 | 201.013929000 |
| H | -24.958664000 | -29.022172000 | 203.423412000 |
| H | -23.877503000 | -30.632240000 | 201.031221000 |
| H | -20.186779000 | -33.698973000 | 204.027693000 |
| H | -25.822662000 | -33.151600000 | 198.663603000 |
| H | -29.249436000 | -31.983192000 | 198.881103000 |
| H | -28.702607000 | -30.908360000 | 200.080336000 |
| H | -29.845722000 | -29.850073000 | 202.431063000 |
| H | -27.025420000 | -30.268122000 | 204.138188000 |
| H | -28.421002000 | -29.679518000 | 203.998353000 |
| H | -32.943030000 | -35.822286000 | 193.650072000 |
| H | -31.697074000 | -37.041807000 | 194.103755000 |
| H | -26.495159000 | -39.982707000 | 199.823315000 |
| H | -25.451469000 | -38.977916000 | 200.463786000 |
| H | -27.641106000 | -39.531072000 | 203.323672000 |
| H | -27.635225000 | -36.712188000 | 199.025060000 |
| H | -26.672532000 | -36.460022000 | 197.388910000 |
| H | -27.067380000 | -35.064549000 | 198.066142000 |
| H | -25.765748000 | -38.448769000 | 196.515194000 |
| H | -25.567101000 | -38.470141000 | 198.057461000 |
| H | -27.982868000 | -39.854234000 | 201.776787000 |
| H | -26.974027000 | -38.002907000 | 199.660767000 |
| H | -24.256035000 | -31.859627000 | 199.126937000 |
| H | -25.283017000 | -31.179177000 | 198.181590000 |
| H | -27.266296000 | -30.884879000 | 198.329277000 |
| H | -26.722116000 | -29.579337000 | 198.870181000 |
| H | -26.696916000 | -39.143709000 | 206.055748000 |
| H | -26.524677000 | -38.148909000 | 204.860177000 |
| H | -25.703243000 | -45.780659000 | 202.103699000 |
| H | -22.859295000 | -30.474522000 | 207.602215000 |
| C | -31.093373000 | -29.022820000 | 203.838126000 |
| H | -31.986309000 | -28.998050000 | 203.183870000 |
| H | -31.407469000 | -29.317570000 | 204.855137000 |
| H | -30.663764000 | -28.004304000 | 203.892686000 |

W6-2

|    |               |               |               |
|----|---------------|---------------|---------------|
| Mn | -24.874772000 | -35.554857000 | 203.951771000 |
| Mn | -27.336111000 | -35.250336000 | 205.251595000 |
| Mn | -27.352291000 | -33.337260000 | 203.207934000 |
| Mn | -27.646031000 | -33.102657000 | 200.456898000 |
| Ca | -27.911926000 | -36.705279000 | 202.217096000 |
| O  | -26.441818000 | -36.528083000 | 204.210687000 |
| O  | -28.379662000 | -34.727465000 | 203.856484000 |
| O  | -26.001854000 | -34.087269000 | 204.515639000 |
| O  | -28.509344000 | -32.493035000 | 202.078334000 |
| O  | -26.856513000 | -34.294453000 | 201.738127000 |
| O  | -28.418857000 | -31.678423000 | 199.394461000 |
| O  | -26.648005000 | -33.799207000 | 199.061401000 |
| O  | -27.673481000 | -37.275035000 | 199.909719000 |
| O  | -28.045510000 | -39.118964000 | 202.507233000 |
| H  | -30.483979000 | -26.831034000 | 200.180170000 |
| C  | -30.241434000 | -27.113395000 | 201.222163000 |

|   |               |               |               |
|---|---------------|---------------|---------------|
| H | -30.724377000 | -26.361921000 | 201.871645000 |
| C | -28.735154000 | -27.322001000 | 201.371794000 |
| C | -28.209062000 | -28.536985000 | 200.606585000 |
| O | -29.126004000 | -29.454207000 | 200.341322000 |
| O | -27.009799000 | -28.621683000 | 200.279037000 |
| C | -32.924381000 | -41.850903000 | 196.489835000 |
| C | -31.510749000 | -41.583966000 | 195.939538000 |
| C | -30.520120000 | -41.387038000 | 197.075530000 |
| C | -29.957659000 | -42.497189000 | 197.743191000 |
| C | -30.197229000 | -40.099051000 | 197.558374000 |
| C | -29.101368000 | -42.339856000 | 198.846294000 |
| C | -29.341314000 | -39.921504000 | 198.658428000 |
| C | -28.787563000 | -41.042456000 | 199.308188000 |
| O | -27.920843000 | -40.835989000 | 200.366505000 |
| H | -33.785375000 | -32.318034000 | 197.913159000 |
| C | -32.844739000 | -31.791422000 | 197.688620000 |
| C | -31.613075000 | -32.674345000 | 197.656140000 |
| O | -30.471521000 | -32.197436000 | 197.499307000 |
| H | -32.688499000 | -30.990043000 | 198.431074000 |
| N | -31.845605000 | -34.016590000 | 197.752407000 |
| C | -30.825021000 | -35.049751000 | 197.612821000 |
| C | -31.079641000 | -35.969691000 | 196.396317000 |
| O | -30.547630000 | -37.086313000 | 196.311247000 |
| C | -30.629116000 | -35.851886000 | 198.910691000 |
| C | -29.852256000 | -35.181073000 | 200.046724000 |
| O | -29.893128000 | -35.708854000 | 201.196229000 |
| O | -29.136864000 | -34.159670000 | 199.733647000 |
| N | -31.868965000 | -35.431074000 | 195.427686000 |
| C | -31.935591000 | -35.967611000 | 194.072817000 |
| H | -31.190723000 | -35.442656000 | 193.449429000 |
| H | -21.516057000 | -41.187718000 | 202.032943000 |
| C | -22.352883000 | -41.458335000 | 202.717392000 |
| C | -22.771449000 | -42.910134000 | 202.612650000 |
| O | -23.539666000 | -43.430592000 | 203.442244000 |
| C | -23.555603000 | -40.511711000 | 202.460785000 |
| C | -23.075614000 | -39.051399000 | 202.377083000 |
| C | -24.163874000 | -37.989061000 | 202.483892000 |
| O | -25.236976000 | -38.033276000 | 201.836811000 |
| O | -23.842298000 | -37.013925000 | 203.289794000 |
| N | -22.260384000 | -43.592859000 | 201.547557000 |
| C | -22.629343000 | -44.962153000 | 201.252063000 |
| H | -21.726399000 | -45.520632000 | 200.924621000 |
| C | -23.738981000 | -45.085576000 | 200.181728000 |
| C | -24.991015000 | -44.395983000 | 200.608352000 |
| C | -25.520284000 | -43.161935000 | 200.272071000 |
| N | -25.823660000 | -44.877901000 | 201.608824000 |
| C | -26.798621000 | -43.962551000 | 201.849636000 |
| N | -26.638859000 | -42.912033000 | 201.047193000 |
| H | -19.262626000 | -31.517297000 | 202.779917000 |
| C | -20.112713000 | -31.328697000 | 202.090235000 |
| C | -21.142730000 | -30.532446000 | 202.875086000 |
| O | -21.409367000 | -30.790814000 | 204.069938000 |
| C | -20.735364000 | -32.619265000 | 201.495065000 |
| C | -21.612032000 | -33.363026000 | 202.449468000 |
| C | -22.948776000 | -33.722468000 | 202.398595000 |
| N | -21.164954000 | -33.808119000 | 203.685681000 |
| C | -22.182084000 | -34.401606000 | 204.345163000 |
| N | -23.281121000 | -34.367244000 | 203.581394000 |
| N | -21.789923000 | -29.567763000 | 202.177150000 |
| C | -22.896307000 | -28.815019000 | 202.759171000 |
| H | -22.557559000 | -28.453986000 | 203.752878000 |
| C | -24.159878000 | -29.674832000 | 202.947275000 |
| C | -24.604805000 | -30.363620000 | 201.660824000 |
| C | -25.681786000 | -31.417491000 | 201.818636000 |
| O | -25.974293000 | -31.879981000 | 202.969353000 |
| O | -26.209251000 | -31.804910000 | 200.718266000 |
| H | -24.827015000 | -28.953570000 | 209.208165000 |
| C | -25.289739000 | -29.704836000 | 209.874338000 |
| H | -25.215628000 | -29.314217000 | 210.902923000 |
| C | -24.600438000 | -31.079871000 | 209.712242000 |
| C | -24.548853000 | -31.571640000 | 208.292288000 |
| C | -25.322263000 | -32.482950000 | 207.592172000 |
| N | -23.615333000 | -31.111720000 | 207.364658000 |

|   |               |               |               |
|---|---------------|---------------|---------------|
| C | -23.798284000 | -31.707712000 | 206.168060000 |
| N | -24.841847000 | -32.539280000 | 206.292880000 |
| H | -24.708982000 | -37.374838000 | 210.156821000 |
| C | -25.333665000 | -37.110846000 | 209.273415000 |
| C | -26.302035000 | -38.223417000 | 208.874647000 |
| O | -26.041521000 | -39.062371000 | 207.991030000 |
| C | -24.375712000 | -36.729140000 | 208.145272000 |
| C | -24.981241000 | -36.077082000 | 206.909470000 |
| O | -26.234316000 | -35.796411000 | 206.894731000 |
| O | -24.171054000 | -35.847324000 | 205.955672000 |
| N | -27.493111000 | -38.234769000 | 209.544673000 |
| C | -28.420988000 | -39.357108000 | 209.469748000 |
| C | -29.316482000 | -39.458924000 | 208.226547000 |
| O | -29.929044000 | -40.514474000 | 207.987829000 |
| N | -29.413221000 | -38.340168000 | 207.476410000 |
| C | -30.109594000 | -38.293024000 | 206.194582000 |
| C | -29.396315000 | -37.290835000 | 205.278945000 |
| O | -29.617253000 | -37.284938000 | 204.055227000 |
| O | -28.617109000 | -36.472422000 | 205.933690000 |
| O | -25.633950000 | -37.837562000 | 197.230463000 |
| O | -27.583050000 | -35.852852000 | 197.730556000 |
| O | -26.539497000 | -30.278796000 | 198.090437000 |
| O | -24.608081000 | -32.075729000 | 198.247660000 |
| O | -28.395436000 | -29.908017000 | 203.130113000 |
| O | -25.776825000 | -39.338249000 | 199.568900000 |
| O | -26.780846000 | -39.069152000 | 205.058806000 |
| H | -30.312617000 | -30.654947000 | 209.009251000 |
| C | -30.997751000 | -31.051074000 | 208.236197000 |
| H | -31.843803000 | -31.521736000 | 208.767318000 |
| C | -30.288915000 | -32.090769000 | 207.355946000 |
| C | -28.891466000 | -31.624983000 | 206.900165000 |
| C | -28.264532000 | -32.613253000 | 205.941613000 |
| O | -28.021407000 | -33.794829000 | 206.398689000 |
| O | -28.025519000 | -32.225890000 | 204.756080000 |
| H | -36.664951000 | -31.802268000 | 206.878367000 |
| C | -36.971479000 | -32.276075000 | 205.926511000 |
| C | -35.739737000 | -32.735765000 | 205.116496000 |
| C | -34.743614000 | -33.573109000 | 205.942641000 |
| C | -33.620886000 | -34.251305000 | 205.143354000 |
| N | -32.722598000 | -33.280653000 | 204.495969000 |
| C | -31.738760000 | -33.610456000 | 203.625316000 |
| N | -31.384735000 | -34.890420000 | 203.463470000 |
| N | -31.142233000 | -32.664506000 | 202.877759000 |
| O | -26.605753000 | -29.665787000 | 205.190121000 |
| H | -32.913215000 | -42.736363000 | 197.153514000 |
| H | -33.260725000 | -40.994810000 | 197.104995000 |
| H | -33.700323000 | -42.030393000 | 195.723193000 |
| H | -31.520299000 | -40.686549000 | 195.292020000 |
| H | -31.190544000 | -42.432299000 | 195.303592000 |
| H | -30.192870000 | -43.512797000 | 197.394481000 |
| H | -28.671789000 | -43.217681000 | 199.343131000 |
| H | -29.078678000 | -38.917870000 | 199.016606000 |
| H | -30.601125000 | -39.206303000 | 197.062792000 |
| H | -27.462980000 | -41.758963000 | 200.709589000 |
| H | -25.170901000 | -42.446027000 | 199.525235000 |
| H | -27.590837000 | -44.096630000 | 202.587924000 |
| H | -28.800060000 | -37.546083000 | 207.681353000 |
| H | -27.650097000 | -37.530933000 | 210.264233000 |
| H | -21.526425000 | -29.396717000 | 201.208800000 |
| H | -21.679315000 | -43.089421000 | 200.879866000 |
| H | -22.969453000 | -45.417891000 | 202.198560000 |
| H | -23.923172000 | -46.159623000 | 199.987562000 |
| H | -23.395045000 | -44.639941000 | 199.231234000 |
| H | -22.556556000 | -38.881203000 | 201.412134000 |
| H | -24.073435000 | -40.797486000 | 201.525787000 |
| H | -21.981785000 | -41.294725000 | 203.746762000 |
| H | -22.337997000 | -38.845082000 | 203.172061000 |
| H | -24.292945000 | -40.630274000 | 203.275893000 |
| H | -26.358768000 | -29.770791000 | 209.604780000 |
| H | -26.160645000 | -33.106216000 | 207.904595000 |
| H | -23.173550000 | -31.545075000 | 205.282855000 |
| H | -23.683421000 | -33.595233000 | 201.601236000 |
| H | -22.116002000 | -34.863810000 | 205.329859000 |

|   |               |               |               |
|---|---------------|---------------|---------------|
| H | -19.696879000 | -30.731343000 | 201.258569000 |
| H | -23.091213000 | -27.943912000 | 202.111913000 |
| H | -29.871632000 | -34.530513000 | 197.391982000 |
| H | -32.798176000 | -34.322545000 | 197.951915000 |
| H | -32.939755000 | -31.304276000 | 196.701380000 |
| H | -32.177895000 | -34.469781000 | 195.566507000 |
| H | -30.773281000 | -28.061448000 | 201.410186000 |
| H | -19.925023000 | -33.275477000 | 201.124709000 |
| H | -21.348346000 | -32.355659000 | 200.614939000 |
| H | -25.919955000 | -36.224804000 | 209.582867000 |
| H | -30.027335000 | -39.285688000 | 205.714055000 |
| C | -31.596627000 | -37.914581000 | 206.337873000 |
| H | -32.084622000 | -37.904352000 | 205.347369000 |
| H | -32.110514000 | -38.657519000 | 206.970580000 |
| H | -31.699431000 | -36.920722000 | 206.810605000 |
| H | -29.087740000 | -39.309921000 | 210.348018000 |
| H | -27.858742000 | -40.306732000 | 209.536504000 |
| H | -23.599702000 | -36.036679000 | 208.521618000 |
| H | -23.835268000 | -37.622601000 | 207.782047000 |
| H | -30.034079000 | -36.751864000 | 198.660834000 |
| H | -31.591737000 | -36.214038000 | 199.314993000 |
| H | -31.370935000 | -30.194303000 | 207.647074000 |
| H | -30.175219000 | -33.044958000 | 207.903391000 |
| H | -28.227072000 | -31.534669000 | 207.780988000 |
| H | -30.909498000 | -32.322932000 | 206.466651000 |
| H | -28.916643000 | -30.638468000 | 206.408478000 |
| H | -28.153464000 | -26.443655000 | 201.038852000 |
| H | -28.448782000 | -27.506430000 | 202.424727000 |
| H | -25.126221000 | -31.842572000 | 210.313599000 |
| H | -23.566290000 | -31.033115000 | 210.103636000 |
| H | -25.276079000 | -33.152100000 | 205.510984000 |
| H | -37.548238000 | -31.526089000 | 205.357493000 |
| H | -35.225897000 | -31.844325000 | 204.703563000 |
| H | -35.288444000 | -34.385381000 | 206.460854000 |
| H | -33.030630000 | -34.888366000 | 205.832533000 |
| H | -37.634553000 | -33.125762000 | 206.170641000 |
| H | -36.071487000 | -33.326613000 | 204.239282000 |
| H | -34.298248000 | -32.947838000 | 206.743036000 |
| H | -32.915857000 | -32.290176000 | 204.627559000 |
| H | -34.052962000 | -34.911269000 | 204.364841000 |
| H | -31.503711000 | -31.716036000 | 202.917292000 |
| H | -31.613353000 | -35.605146000 | 204.146442000 |
| H | -30.155365000 | -32.760905000 | 202.524738000 |
| H | -30.679359000 | -35.138666000 | 202.753143000 |
| H | -23.950362000 | -30.442186000 | 203.709056000 |
| H | -24.973091000 | -29.643030000 | 200.909123000 |
| H | -24.976022000 | -29.053530000 | 203.355662000 |
| H | -23.741965000 | -30.892009000 | 201.202389000 |
| H | -20.236798000 | -33.644395000 | 204.073041000 |
| H | -25.903203000 | -33.204708000 | 198.753896000 |
| H | -29.140362000 | -32.018872000 | 198.803168000 |
| H | -28.756220000 | -30.380661000 | 199.957923000 |
| H | -28.379900000 | -30.801122000 | 202.681157000 |
| H | -26.153541000 | -30.527250000 | 205.142785000 |
| H | -27.252497000 | -29.762544000 | 204.432584000 |
| H | -32.943403000 | -35.819049000 | 193.652154000 |
| H | -31.699171000 | -37.042617000 | 194.098943000 |
| H | -26.520856000 | -39.956044000 | 199.815551000 |
| H | -25.468365000 | -38.961265000 | 200.447682000 |
| H | -27.660331000 | -39.485707000 | 203.337331000 |
| H | -27.704354000 | -36.691092000 | 199.067242000 |
| H | -26.820078000 | -36.400300000 | 197.410555000 |
| H | -27.180464000 | -35.025057000 | 198.154868000 |
| H | -25.972090000 | -38.403837000 | 196.511555000 |
| H | -25.675844000 | -38.420248000 | 198.037310000 |
| H | -28.013290000 | -39.808772000 | 201.795008000 |
| H | -27.017440000 | -37.980957000 | 199.685548000 |
| H | -24.237206000 | -31.955218000 | 199.140324000 |
| H | -25.281109000 | -31.310881000 | 198.184218000 |
| H | -27.241528000 | -30.920329000 | 198.418892000 |
| H | -26.548953000 | -29.637912000 | 198.852906000 |
| H | -26.702177000 | -39.128863000 | 206.035956000 |
| H | -26.536321000 | -38.125207000 | 204.843086000 |

|   |               |               |               |
|---|---------------|---------------|---------------|
| H | -25.697913000 | -45.750265000 | 202.119810000 |
| H | -22.877952000 | -30.433118000 | 207.557923000 |
| C | -29.717659000 | -29.727348000 | 203.635711000 |
| H | -30.460373000 | -29.711260000 | 202.812279000 |
| H | -29.985874000 | -30.518714000 | 204.365012000 |
| H | -29.757782000 | -28.750266000 | 204.147965000 |

W7-1

|    |               |               |               |
|----|---------------|---------------|---------------|
| Mn | -24.870327000 | -35.522954000 | 203.949289000 |
| Mn | -27.336663000 | -35.225841000 | 205.243670000 |
| Mn | -27.336964000 | -33.333551000 | 203.190165000 |
| Mn | -27.577176000 | -33.147757000 | 200.457318000 |
| Ca | -27.902318000 | -36.709558000 | 202.220681000 |
| O  | -26.433540000 | -36.505935000 | 204.221020000 |
| O  | -28.364555000 | -34.728086000 | 203.826170000 |
| O  | -26.004203000 | -34.060588000 | 204.506963000 |
| O  | -28.534223000 | -32.623598000 | 202.021891000 |
| O  | -26.762276000 | -34.279450000 | 201.718131000 |
| O  | -28.417787000 | -31.698838000 | 199.303130000 |
| O  | -26.494610000 | -33.696650000 | 199.065207000 |
| O  | -27.629056000 | -37.250747000 | 199.902924000 |
| O  | -28.051112000 | -39.120841000 | 202.488029000 |
| H  | -30.482331000 | -26.828926000 | 200.180096000 |
| C  | -30.241434000 | -27.113395000 | 201.222163000 |
| H  | -30.724377000 | -26.361921000 | 201.871645000 |
| C  | -28.726393000 | -27.316509000 | 201.372635000 |
| C  | -28.192317000 | -28.472376000 | 200.500646000 |
| O  | -28.969109000 | -29.508309000 | 200.406917000 |
| O  | -27.059286000 | -28.375877000 | 199.953902000 |
| C  | -32.924381000 | -41.850903000 | 196.489835000 |
| C  | -31.519885000 | -41.537659000 | 195.940693000 |
| C  | -30.527519000 | -41.352153000 | 197.077181000 |
| C  | -29.959851000 | -42.470362000 | 197.727002000 |
| C  | -30.205653000 | -40.070378000 | 197.576876000 |
| C  | -29.100558000 | -42.326577000 | 198.829317000 |
| C  | -29.345672000 | -39.906064000 | 198.676097000 |
| C  | -28.788319000 | -41.035075000 | 199.308508000 |
| O  | -27.919360000 | -40.842401000 | 200.366970000 |
| H  | -33.785375000 | -32.318034000 | 197.913159000 |
| C  | -32.844739000 | -31.791422000 | 197.688620000 |
| C  | -31.617559000 | -32.678165000 | 197.686642000 |
| O  | -30.469204000 | -32.200807000 | 197.565417000 |
| H  | -32.696525000 | -30.976126000 | 198.416984000 |
| N  | -31.849686000 | -34.020775000 | 197.760828000 |
| C  | -30.825021000 | -35.049751000 | 197.612821000 |
| C  | -31.071864000 | -35.962904000 | 196.390288000 |
| O  | -30.514240000 | -37.066492000 | 196.295407000 |
| C  | -30.603165000 | -35.855146000 | 198.904447000 |
| C  | -29.784254000 | -35.196034000 | 200.016255000 |
| O  | -29.859991000 | -35.664860000 | 201.188113000 |
| O  | -28.980496000 | -34.255343000 | 199.657971000 |
| N  | -31.873120000 | -35.433016000 | 195.428633000 |
| C  | -31.935591000 | -35.967611000 | 194.072817000 |
| H  | -31.190723000 | -35.442656000 | 193.449429000 |
| H  | -21.516057000 | -41.187718000 | 202.032943000 |
| C  | -22.352883000 | -41.458335000 | 202.717392000 |
| C  | -22.778140000 | -42.907808000 | 202.606510000 |
| O  | -23.555798000 | -43.425178000 | 203.429201000 |
| C  | -23.551576000 | -40.505996000 | 202.469122000 |
| C  | -23.072827000 | -39.044759000 | 202.440962000 |
| C  | -24.161893000 | -37.982256000 | 202.528971000 |
| O  | -25.240996000 | -38.043209000 | 201.893529000 |
| O  | -23.832502000 | -36.984776000 | 203.304035000 |
| N  | -22.260912000 | -43.592647000 | 201.546055000 |
| C  | -22.629343000 | -44.962153000 | 201.252063000 |
| H  | -21.726399000 | -45.520632000 | 200.924621000 |
| C  | -23.736914000 | -45.088452000 | 200.179750000 |
| C  | -24.991654000 | -44.401532000 | 200.602173000 |
| C  | -25.519733000 | -43.166693000 | 200.267418000 |
| N  | -25.830434000 | -44.888458000 | 201.595083000 |
| C  | -26.807838000 | -43.975362000 | 201.833477000 |
| N  | -26.643571000 | -42.921420000 | 201.036247000 |



|   |               |               |               |
|---|---------------|---------------|---------------|
| H | -19.262626000 | -31.517297000 | 202.779917000 |
| C | -20.112713000 | -31.328697000 | 202.090235000 |
| C | -21.150924000 | -30.543013000 | 202.876637000 |
| O | -21.404416000 | -30.792171000 | 204.076066000 |
| C | -20.736533000 | -32.606043000 | 201.468692000 |
| C | -21.613173000 | -33.358059000 | 202.414833000 |
| C | -22.964017000 | -33.662367000 | 202.387716000 |
| N | -21.149027000 | -33.857447000 | 203.623886000 |
| C | -22.169071000 | -34.434248000 | 204.291871000 |
| N | -23.286472000 | -34.334770000 | 203.559878000 |
| N | -21.815298000 | -29.594693000 | 202.172416000 |
| C | -22.896307000 | -28.815019000 | 202.759171000 |
| H | -22.557559000 | -28.453986000 | 203.752878000 |
| C | -24.185409000 | -29.638210000 | 202.969095000 |
| C | -24.761443000 | -30.205938000 | 201.673914000 |
| C | -25.772813000 | -31.318305000 | 201.837418000 |
| O | -26.011311000 | -31.833452000 | 202.980671000 |
| O | -26.319686000 | -31.708406000 | 200.750819000 |
| H | -24.829409000 | -28.952144000 | 209.208008000 |
| C | -25.289739000 | -29.704836000 | 209.874338000 |
| H | -25.215628000 | -29.314217000 | 210.902923000 |
| C | -24.595981000 | -31.077421000 | 209.712730000 |
| C | -24.539308000 | -31.561618000 | 208.290842000 |
| C | -25.328512000 | -32.446593000 | 207.574818000 |
| N | -23.587294000 | -31.114455000 | 207.375765000 |
| C | -23.775291000 | -31.693240000 | 206.170946000 |
| N | -24.837640000 | -32.500079000 | 206.279888000 |
| H | -24.708982000 | -37.374838000 | 210.156821000 |
| C | -25.333665000 | -37.110846000 | 209.273415000 |
| C | -26.302840000 | -38.222524000 | 208.874467000 |
| O | -26.046410000 | -39.057201000 | 207.985464000 |
| C | -24.384464000 | -36.716787000 | 208.141529000 |
| C | -24.990045000 | -36.045004000 | 206.914116000 |
| O | -26.242278000 | -35.753011000 | 206.900051000 |
| O | -24.178714000 | -35.812076000 | 205.962682000 |
| N | -27.491376000 | -38.236180000 | 209.549062000 |
| C | -28.420988000 | -39.357108000 | 209.469748000 |
| C | -29.306552000 | -39.455482000 | 208.219498000 |
| O | -29.914538000 | -40.511453000 | 207.971371000 |
| N | -29.399945000 | -38.334931000 | 207.470842000 |
| C | -30.086922000 | -38.292285000 | 206.184026000 |
| C | -29.380929000 | -37.280747000 | 205.273204000 |
| O | -29.585668000 | -37.290190000 | 204.047530000 |
| O | -28.620398000 | -36.444547000 | 205.930070000 |
| O | -25.319209000 | -37.792074000 | 197.375687000 |
| O | -27.303677000 | -35.843080000 | 197.734773000 |
| O | -26.149664000 | -30.331849000 | 198.217333000 |
| O | -24.234366000 | -32.102436000 | 198.987895000 |
| O | -29.771028000 | -30.365354000 | 202.805933000 |
| O | -25.763966000 | -39.342096000 | 199.625199000 |
| O | -26.802378000 | -39.051785000 | 205.058898000 |
| H | -30.324259000 | -30.622485000 | 209.001952000 |
| C | -30.997751000 | -31.051074000 | 208.236197000 |
| H | -31.843803000 | -31.521736000 | 208.767318000 |
| C | -30.269249000 | -32.098108000 | 207.384956000 |
| C | -28.955953000 | -31.560756000 | 206.785841000 |
| C | -28.300080000 | -32.568140000 | 205.868348000 |
| O | -28.055664000 | -33.738742000 | 206.345955000 |
| O | -28.030405000 | -32.192521000 | 204.681267000 |
| H | -36.646684000 | -31.794178000 | 206.868346000 |
| C | -36.971479000 | -32.276075000 | 205.926511000 |
| C | -35.758689000 | -32.785046000 | 205.122781000 |
| C | -34.831550000 | -33.691931000 | 205.955627000 |
| C | -33.740342000 | -34.427883000 | 205.167072000 |
| N | -32.750409000 | -33.508390000 | 204.583063000 |
| C | -31.819380000 | -33.872110000 | 203.671899000 |
| N | -31.643170000 | -35.171937000 | 203.373919000 |
| N | -31.109921000 | -32.949431000 | 203.008700000 |
| O | -27.614711000 | -29.295752000 | 204.202005000 |
| H | -32.889367000 | -42.751956000 | 197.131394000 |
| H | -33.277716000 | -41.018542000 | 197.127690000 |
| H | -33.700323000 | -42.030393000 | 195.723193000 |
| H | -31.551394000 | -40.622879000 | 195.318702000 |

|   |               |               |               |
|---|---------------|---------------|---------------|
| H | -31.184857000 | -42.360812000 | 195.279644000 |
| H | -30.193170000 | -43.481548000 | 197.364461000 |
| H | -28.667182000 | -43.210376000 | 199.312138000 |
| H | -29.079096000 | -38.906795000 | 199.044468000 |
| H | -30.612482000 | -39.172580000 | 197.092925000 |
| H | -27.462577000 | -41.771897000 | 200.705047000 |
| H | -25.166129000 | -42.447108000 | 199.526207000 |
| H | -27.605110000 | -44.112989000 | 202.565610000 |
| H | -28.795466000 | -37.537328000 | 207.685729000 |
| H | -27.645124000 | -37.536429000 | 210.273344000 |
| H | -21.558364000 | -29.430812000 | 201.201399000 |
| H | -21.671056000 | -43.092553000 | 200.883629000 |
| H | -22.970336000 | -45.417371000 | 202.198471000 |
| H | -23.918439000 | -46.163022000 | 199.986102000 |
| H | -23.391478000 | -44.643102000 | 199.229674000 |
| H | -22.514656000 | -38.847711000 | 201.502971000 |
| H | -24.051745000 | -40.764306000 | 201.516674000 |
| H | -21.979404000 | -41.303212000 | 203.747365000 |
| H | -22.366169000 | -38.856697000 | 203.268152000 |
| H | -24.302816000 | -40.650043000 | 203.267251000 |
| H | -26.359047000 | -29.774314000 | 209.606400000 |
| H | -26.183429000 | -33.053209000 | 207.875175000 |
| H | -23.142886000 | -31.532043000 | 205.290592000 |
| H | -23.709377000 | -33.460105000 | 201.614727000 |
| H | -22.093040000 | -34.932172000 | 205.258322000 |
| H | -19.694979000 | -30.715968000 | 201.270080000 |
| H | -23.077394000 | -27.941392000 | 202.110943000 |
| H | -29.878648000 | -34.518149000 | 197.386752000 |
| H | -32.805996000 | -34.330239000 | 197.936846000 |
| H | -32.928235000 | -31.325818000 | 196.689898000 |
| H | -32.198233000 | -34.477559000 | 195.570801000 |
| H | -30.771964000 | -28.063800000 | 201.409696000 |
| H | -19.929424000 | -33.258049000 | 201.084384000 |
| H | -21.356850000 | -32.323259000 | 200.599215000 |
| H | -25.921913000 | -36.228237000 | 209.589965000 |
| H | -29.984063000 | -39.282062000 | 205.701476000 |
| C | -31.581418000 | -37.942643000 | 206.318655000 |
| H | -32.068366000 | -37.959801000 | 205.327574000 |
| H | -32.080225000 | -38.689108000 | 206.959172000 |
| H | -31.707720000 | -36.945328000 | 206.777458000 |
| H | -29.092216000 | -39.309979000 | 210.344412000 |
| H | -27.858742000 | -40.306732000 | 209.536504000 |
| H | -23.602517000 | -36.032910000 | 208.521147000 |
| H | -23.850055000 | -37.607339000 | 207.762413000 |
| H | -30.020053000 | -36.758882000 | 198.636827000 |
| H | -31.556405000 | -36.209472000 | 199.335264000 |
| H | -31.382969000 | -30.217503000 | 207.621430000 |
| H | -30.041057000 | -32.995537000 | 207.989364000 |
| H | -28.240408000 | -31.332897000 | 207.601117000 |
| H | -30.927688000 | -32.445103000 | 206.563390000 |
| H | -29.109941000 | -30.631139000 | 206.210688000 |
| H | -28.157828000 | -26.404286000 | 201.120152000 |
| H | -28.458943000 | -27.580709000 | 202.415782000 |
| H | -25.122508000 | -31.842703000 | 210.310177000 |
| H | -23.563523000 | -31.028750000 | 210.108153000 |
| H | -25.271800000 | -33.099321000 | 205.495821000 |
| H | -37.548238000 | -31.526089000 | 205.357493000 |
| H | -35.187417000 | -31.919674000 | 204.730902000 |
| H | -35.436597000 | -34.474738000 | 206.452124000 |
| H | -33.224496000 | -35.137238000 | 205.845016000 |
| H | -37.650039000 | -33.107123000 | 206.193617000 |
| H | -36.109602000 | -33.345423000 | 204.233036000 |
| H | -34.364738000 | -33.108122000 | 206.775224000 |
| H | -32.846127000 | -32.513733000 | 204.776443000 |
| H | -34.200373000 | -35.019879000 | 204.350865000 |
| H | -31.218128000 | -31.946080000 | 203.182592000 |
| H | -31.911253000 | -35.899473000 | 204.029447000 |
| H | -30.197656000 | -33.185293000 | 202.572991000 |
| H | -30.923914000 | -35.424506000 | 202.680728000 |
| H | -23.954883000 | -30.467850000 | 203.657223000 |
| H | -25.249878000 | -29.428349000 | 201.055840000 |
| H | -24.940442000 | -29.007043000 | 203.473105000 |
| H | -23.971588000 | -30.651829000 | 201.034132000 |

|   |               |               |               |
|---|---------------|---------------|---------------|
| H | -20.203004000 | -33.747757000 | 203.986147000 |
| H | -25.599883000 | -33.242658000 | 199.084041000 |
| H | -29.188163000 | -31.979048000 | 198.732039000 |
| H | -28.634011000 | -30.762151000 | 199.770039000 |
| H | -29.697227000 | -29.922588000 | 201.910188000 |
| H | -29.219620000 | -31.179757000 | 202.613648000 |
| H | -27.128018000 | -30.139542000 | 204.279130000 |
| H | -28.448919000 | -29.601541000 | 203.745594000 |
| H | -32.943008000 | -35.819108000 | 193.651526000 |
| H | -31.698937000 | -37.042536000 | 194.097512000 |
| H | -26.515215000 | -39.962549000 | 199.841895000 |
| H | -25.471028000 | -38.982647000 | 200.516485000 |
| H | -27.676445000 | -39.485598000 | 203.323593000 |
| H | -27.588577000 | -36.662028000 | 199.063904000 |
| H | -26.512675000 | -36.393969000 | 197.492780000 |
| H | -26.940509000 | -35.005589000 | 198.163636000 |
| H | -25.534730000 | -38.325272000 | 196.587573000 |
| H | -25.474613000 | -38.412519000 | 198.140162000 |
| H | -28.020757000 | -39.817532000 | 201.781468000 |
| H | -26.982105000 | -37.974356000 | 199.703695000 |
| H | -24.871564000 | -31.350469000 | 198.762800000 |
| H | -26.865061000 | -30.997066000 | 198.368739000 |
| H | -26.426448000 | -29.620717000 | 198.871906000 |
| H | -26.718708000 | -39.118327000 | 206.035234000 |
| H | -26.542872000 | -38.111519000 | 204.848038000 |
| H | -25.707558000 | -45.763213000 | 202.102717000 |
| H | -22.835243000 | -30.456391000 | 207.582363000 |
| C | -23.340112000 | -32.273345000 | 197.878339000 |
| H | -22.705596000 | -31.377002000 | 197.722446000 |
| H | -22.682554000 | -33.131642000 | 198.103566000 |
| H | -23.882400000 | -32.487666000 | 196.934891000 |

W8-1

|    |               |               |               |
|----|---------------|---------------|---------------|
| Mn | -24.863552000 | -35.541144000 | 203.952709000 |
| Mn | -27.337747000 | -35.218596000 | 205.227168000 |
| Mn | -27.324847000 | -33.345577000 | 203.151023000 |
| Mn | -27.561445000 | -33.189903000 | 200.409260000 |
| Ca | -27.892368000 | -36.732116000 | 202.211507000 |
| O  | -26.435015000 | -36.510852000 | 204.220656000 |
| O  | -28.359077000 | -34.725751000 | 203.800723000 |
| O  | -25.996648000 | -34.063873000 | 204.482505000 |
| O  | -28.488174000 | -32.608496000 | 201.975682000 |
| O  | -26.773404000 | -34.323545000 | 201.683090000 |
| O  | -28.334027000 | -31.726295000 | 199.278254000 |
| O  | -26.552237000 | -33.813128000 | 198.991487000 |
| O  | -27.657989000 | -37.283010000 | 199.900372000 |
| O  | -28.033115000 | -39.140603000 | 202.496695000 |
| H  | -30.459948000 | -26.816649000 | 200.178746000 |
| C  | -30.241434000 | -27.113395000 | 201.222163000 |
| H  | -30.724377000 | -26.361921000 | 201.871645000 |
| C  | -28.731432000 | -27.319153000 | 201.406074000 |
| C  | -28.184267000 | -28.438269000 | 200.500196000 |
| O  | -28.915137000 | -29.498985000 | 200.391030000 |
| O  | -27.070503000 | -28.280873000 | 199.919893000 |
| C  | -32.924381000 | -41.850903000 | 196.489835000 |
| C  | -31.509623000 | -41.590178000 | 195.939715000 |
| C  | -30.519109000 | -41.396903000 | 197.076264000 |
| C  | -29.959386000 | -42.509298000 | 197.742485000 |
| C  | -30.194425000 | -40.110350000 | 197.561601000 |
| C  | -29.104130000 | -42.355463000 | 198.846756000 |
| C  | -29.339408000 | -39.936304000 | 198.662939000 |
| C  | -28.788558000 | -41.059474000 | 199.311301000 |
| O  | -27.922695000 | -40.857113000 | 200.371002000 |
| H  | -33.785375000 | -32.318034000 | 197.913159000 |
| C  | -32.844739000 | -31.791422000 | 197.688620000 |
| C  | -31.610331000 | -32.670540000 | 197.694472000 |
| O  | -30.463372000 | -32.187593000 | 197.591463000 |
| H  | -32.702585000 | -30.970456000 | 198.411795000 |
| N  | -31.843429000 | -34.013563000 | 197.751702000 |
| C  | -30.825021000 | -35.049751000 | 197.612821000 |
| C  | -31.088890000 | -35.971647000 | 196.399295000 |
| O  | -30.572611000 | -37.096048000 | 196.322558000 |

|   |               |               |               |
|---|---------------|---------------|---------------|
| C | -30.629213000 | -35.852626000 | 198.911585000 |
| C | -29.813780000 | -35.200858000 | 200.030118000 |
| O | -29.863780000 | -35.694209000 | 201.192731000 |
| O | -29.040131000 | -34.233363000 | 199.677542000 |
| N | -31.866534000 | -35.426257000 | 195.425836000 |
| C | -31.935591000 | -35.967611000 | 194.072817000 |
| H | -31.190723000 | -35.442656000 | 193.449429000 |
| H | -21.516057000 | -41.187718000 | 202.032943000 |
| C | -22.352883000 | -41.458335000 | 202.717392000 |
| C | -22.774900000 | -42.909014000 | 202.609532000 |
| O | -23.547260000 | -43.428101000 | 203.436100000 |
| C | -23.554753000 | -40.509720000 | 202.464513000 |
| C | -23.074019000 | -39.049252000 | 202.386063000 |
| C | -24.160419000 | -37.986255000 | 202.499638000 |
| O | -25.234726000 | -38.026195000 | 201.854155000 |
| O | -23.836864000 | -37.014068000 | 203.309642000 |
| N | -22.262496000 | -43.592051000 | 201.545405000 |
| C | -22.629343000 | -44.962153000 | 201.252063000 |
| H | -21.726399000 | -45.520632000 | 200.924621000 |
| C | -23.737876000 | -45.090795000 | 200.181258000 |
| C | -24.993343000 | -44.408232000 | 200.607861000 |
| C | -25.524818000 | -43.173850000 | 200.277119000 |
| N | -25.827510000 | -44.898410000 | 201.603003000 |
| C | -26.806038000 | -43.987662000 | 201.846172000 |
| N | -26.646273000 | -42.932014000 | 201.050434000 |
| H | -19.262626000 | -31.517297000 | 202.779917000 |
| C | -20.112713000 | -31.328697000 | 202.090235000 |
| C | -21.152633000 | -30.543716000 | 202.873894000 |
| O | -21.414154000 | -30.797797000 | 204.070560000 |
| C | -20.725502000 | -32.619954000 | 201.485896000 |
| C | -21.599871000 | -33.368718000 | 202.437719000 |
| C | -22.943385000 | -33.703070000 | 202.400176000 |
| N | -21.142719000 | -33.839588000 | 203.660743000 |
| C | -22.159498000 | -34.426317000 | 204.325713000 |
| N | -23.268689000 | -34.361965000 | 203.577981000 |
| N | -21.812624000 | -29.590912000 | 202.170873000 |
| C | -22.896307000 | -28.815019000 | 202.759171000 |
| H | -22.557559000 | -28.453986000 | 203.752878000 |
| C | -24.184322000 | -29.642612000 | 202.953019000 |
| C | -24.753154000 | -30.189876000 | 201.643405000 |
| C | -25.712993000 | -31.352926000 | 201.783538000 |
| O | -26.007451000 | -31.829819000 | 202.924731000 |
| O | -26.168956000 | -31.812667000 | 200.674648000 |
| H | -24.814783000 | -28.958795000 | 209.210708000 |
| C | -25.289739000 | -29.704836000 | 209.874338000 |
| H | -25.215628000 | -29.314217000 | 210.902923000 |
| C | -24.617173000 | -31.087868000 | 209.712703000 |
| C | -24.558625000 | -31.568098000 | 208.289225000 |
| C | -25.348671000 | -32.447343000 | 207.566831000 |
| N | -23.599453000 | -31.123738000 | 207.380300000 |
| C | -23.783538000 | -31.698561000 | 206.173213000 |
| N | -24.850465000 | -32.500871000 | 206.274366000 |
| H | -24.708982000 | -37.374838000 | 210.156821000 |
| C | -25.333665000 | -37.110846000 | 209.273415000 |
| C | -26.302822000 | -38.222553000 | 208.875453000 |
| O | -26.047346000 | -39.055718000 | 207.984512000 |
| C | -24.388708000 | -36.713536000 | 208.140151000 |
| C | -24.995679000 | -36.041357000 | 206.913535000 |
| O | -26.245869000 | -35.741938000 | 206.895811000 |
| O | -24.181704000 | -35.814691000 | 205.962095000 |
| N | -27.489748000 | -38.237637000 | 209.552173000 |
| C | -28.420988000 | -39.357108000 | 209.469748000 |
| C | -29.303154000 | -39.451381000 | 208.216634000 |
| O | -29.915182000 | -40.504632000 | 207.967177000 |
| N | -29.389153000 | -38.331332000 | 207.465885000 |
| C | -30.077962000 | -38.288094000 | 206.179911000 |
| C | -29.374272000 | -37.278033000 | 205.266498000 |
| O | -29.572027000 | -37.296424000 | 204.039900000 |
| O | -28.624555000 | -36.429652000 | 205.920971000 |
| O | -25.591718000 | -37.882656000 | 197.241527000 |
| O | -27.539559000 | -35.898405000 | 197.701579000 |
| O | -26.622937000 | -29.336135000 | 197.529000000 |
| O | -25.242021000 | -31.573987000 | 198.070023000 |

|   |               |               |               |
|---|---------------|---------------|---------------|
| O | -29.765982000 | -30.373224000 | 202.757130000 |
| O | -25.776469000 | -39.356343000 | 199.593622000 |
| O | -26.816504000 | -39.053216000 | 205.079566000 |
| H | -30.318379000 | -30.628900000 | 209.000204000 |
| C | -30.997751000 | -31.051074000 | 208.236197000 |
| H | -31.843803000 | -31.521736000 | 208.767318000 |
| C | -30.275855000 | -32.094729000 | 207.370890000 |
| C | -28.986172000 | -31.547573000 | 206.728324000 |
| C | -28.312936000 | -32.559234000 | 205.824262000 |
| O | -28.066594000 | -33.724546000 | 206.313441000 |
| O | -28.021648000 | -32.190600000 | 204.639095000 |
| H | -36.654631000 | -31.797146000 | 206.872551000 |
| C | -36.971479000 | -32.276075000 | 205.926511000 |
| C | -35.751032000 | -32.770331000 | 205.124119000 |
| C | -34.809460000 | -33.661622000 | 205.957761000 |
| C | -33.720622000 | -34.398841000 | 205.167004000 |
| N | -32.737091000 | -33.482985000 | 204.565982000 |
| C | -31.798430000 | -33.863394000 | 203.669152000 |
| N | -31.616795000 | -35.167758000 | 203.399854000 |
| N | -31.081643000 | -32.953536000 | 202.995496000 |
| O | -27.612652000 | -29.306295000 | 204.164586000 |
| H | -32.916381000 | -42.734552000 | 197.155932000 |
| H | -33.258476000 | -40.992101000 | 197.102375000 |
| H | -33.700323000 | -42.030393000 | 195.723193000 |
| H | -31.515155000 | -40.693211000 | 195.291570000 |
| H | -31.192533000 | -42.440189000 | 195.304532000 |
| H | -30.196080000 | -43.523804000 | 197.391635000 |
| H | -28.676692000 | -43.234895000 | 199.342570000 |
| H | -29.074957000 | -38.933812000 | 199.023095000 |
| H | -30.596810000 | -39.216328000 | 197.067212000 |
| H | -27.466160000 | -41.783612000 | 200.715233000 |
| H | -25.175221000 | -42.452411000 | 199.535771000 |
| H | -27.600499000 | -44.128438000 | 202.580747000 |
| H | -28.785683000 | -37.533482000 | 207.682062000 |
| H | -27.643606000 | -37.537980000 | 210.276523000 |
| H | -21.544442000 | -29.417557000 | 201.204322000 |
| H | -21.675753000 | -43.090846000 | 200.881034000 |
| H | -22.969015000 | -45.417276000 | 202.199022000 |
| H | -23.916369000 | -46.165723000 | 199.986821000 |
| H | -23.395715000 | -44.643100000 | 199.231097000 |
| H | -22.557590000 | -38.874560000 | 201.420548000 |
| H | -24.072759000 | -40.791864000 | 201.528546000 |
| H | -21.980558000 | -41.298109000 | 203.746851000 |
| H | -22.333387000 | -38.847901000 | 203.179389000 |
| H | -24.291707000 | -40.631109000 | 203.279514000 |
| H | -26.358665000 | -29.757244000 | 209.600929000 |
| H | -26.208558000 | -33.050065000 | 207.860781000 |
| H | -23.145795000 | -31.537351000 | 205.296715000 |
| H | -23.686578000 | -33.545366000 | 201.615984000 |
| H | -22.086596000 | -34.904011000 | 205.302531000 |
| H | -19.698708000 | -30.723327000 | 201.263407000 |
| H | -23.075962000 | -27.937982000 | 202.114773000 |
| H | -29.870272000 | -34.534864000 | 197.387791000 |
| H | -32.802698000 | -34.320867000 | 197.914554000 |
| H | -32.927882000 | -31.331881000 | 196.686881000 |
| H | -32.157786000 | -34.458220000 | 195.556333000 |
| H | -30.780866000 | -28.061891000 | 201.393689000 |
| H | -19.910388000 | -33.270742000 | 201.116632000 |
| H | -21.339029000 | -32.355689000 | 200.606814000 |
| H | -25.922472000 | -36.229296000 | 209.592268000 |
| H | -29.977401000 | -39.278056000 | 205.697579000 |
| C | -31.572024000 | -37.936386000 | 206.317009000 |
| H | -32.060893000 | -37.954881000 | 205.326911000 |
| H | -32.070157000 | -38.681557000 | 206.959536000 |
| H | -31.696323000 | -36.938307000 | 206.774708000 |
| H | -29.094049000 | -39.310240000 | 210.342905000 |
| H | -27.858742000 | -40.306732000 | 209.536504000 |
| H | -23.607496000 | -36.028271000 | 208.518868000 |
| H | -23.852755000 | -37.602193000 | 207.758850000 |
| H | -30.057733000 | -36.766473000 | 198.654724000 |
| H | -31.593329000 | -36.190438000 | 199.332090000 |
| H | -31.384605000 | -30.212790000 | 207.628640000 |
| H | -30.019920000 | -32.983971000 | 207.976292000 |

|   |               |               |               |
|---|---------------|---------------|---------------|
| H | -28.258775000 | -31.280816000 | 207.521683000 |
| H | -30.952272000 | -32.456953000 | 206.570792000 |
| H | -29.170624000 | -30.635628000 | 206.134174000 |
| H | -28.161289000 | -26.397507000 | 201.195724000 |
| H | -28.491247000 | -27.615684000 | 202.446334000 |
| H | -25.159425000 | -31.846816000 | 210.304069000 |
| H | -23.586398000 | -31.057371000 | 210.114342000 |
| H | -25.278581000 | -33.098356000 | 205.486347000 |
| H | -37.548238000 | -31.526089000 | 205.357493000 |
| H | -35.192795000 | -31.897755000 | 204.729365000 |
| H | -35.404260000 | -34.444212000 | 206.466824000 |
| H | -33.195960000 | -35.098647000 | 205.848005000 |
| H | -37.645505000 | -33.113381000 | 206.184914000 |
| H | -36.094748000 | -33.337703000 | 204.236021000 |
| H | -34.339912000 | -33.066549000 | 206.767520000 |
| H | -32.847714000 | -32.484096000 | 204.726669000 |
| H | -34.186050000 | -35.001304000 | 204.361379000 |
| H | -31.181606000 | -31.945726000 | 203.149587000 |
| H | -31.918395000 | -35.886779000 | 204.049551000 |
| H | -30.179101000 | -33.205088000 | 202.554427000 |
| H | -30.893403000 | -35.436756000 | 202.718193000 |
| H | -23.953307000 | -30.484527000 | 203.626091000 |
| H | -25.295289000 | -29.415115000 | 201.062702000 |
| H | -24.945217000 | -29.025339000 | 203.464323000 |
| H | -23.940237000 | -30.555237000 | 200.983215000 |
| H | -20.204878000 | -33.702452000 | 204.034862000 |
| H | -26.168123000 | -33.047762000 | 198.467025000 |
| H | -29.116808000 | -31.978525000 | 198.712736000 |
| H | -28.520455000 | -30.793780000 | 199.721088000 |
| H | -29.678233000 | -29.927521000 | 201.862258000 |
| H | -29.202190000 | -31.179755000 | 202.570728000 |
| H | -27.140796000 | -30.156830000 | 204.258648000 |
| H | -28.446311000 | -29.608284000 | 203.704590000 |
| H | -32.943617000 | -35.820115000 | 193.652282000 |
| H | -31.698740000 | -37.042313000 | 194.101937000 |
| H | -26.523337000 | -39.973419000 | 199.835001000 |
| H | -25.472950000 | -38.975489000 | 200.471726000 |
| H | -27.670961000 | -39.508871000 | 203.335728000 |
| H | -27.683436000 | -36.712579000 | 199.047918000 |
| H | -26.778117000 | -36.455789000 | 197.392747000 |
| H | -27.130948000 | -35.068260000 | 198.110610000 |
| H | -25.897466000 | -38.457048000 | 196.514604000 |
| H | -25.653564000 | -38.460401000 | 198.050483000 |
| H | -28.014553000 | -39.838874000 | 201.791475000 |
| H | -27.006327000 | -37.996894000 | 199.685791000 |
| H | -25.354296000 | -31.474852000 | 199.043391000 |
| H | -25.818217000 | -30.813293000 | 197.742732000 |
| H | -26.853322000 | -29.057084000 | 198.475802000 |
| H | -26.713821000 | -39.121407000 | 206.054325000 |
| H | -26.552890000 | -38.115870000 | 204.863836000 |
| H | -25.701618000 | -45.774219000 | 202.108086000 |
| H | -22.845425000 | -30.469729000 | 207.592687000 |
| C | -25.714009000 | -28.340630000 | 197.029113000 |
| H | -24.761967000 | -28.325112000 | 197.599490000 |
| H | -25.485150000 | -28.584166000 | 195.976597000 |
| H | -26.162268000 | -27.328138000 | 197.067755000 |

W8-2

|    |               |               |               |
|----|---------------|---------------|---------------|
| Mn | -24.869857000 | -35.543125000 | 203.950564000 |
| Mn | -27.341772000 | -35.217086000 | 205.233007000 |
| Mn | -27.321878000 | -33.342012000 | 203.157215000 |
| Mn | -27.572485000 | -33.155773000 | 200.407478000 |
| Ca | -27.895236000 | -36.694744000 | 202.207814000 |
| O  | -26.441155000 | -36.510108000 | 204.220163000 |
| O  | -28.365992000 | -34.716587000 | 203.816230000 |
| O  | -25.995157000 | -34.066816000 | 204.493746000 |
| O  | -28.486787000 | -32.587612000 | 201.989789000 |
| O  | -26.776245000 | -34.318581000 | 201.713607000 |
| O  | -28.347359000 | -31.714288000 | 199.345825000 |
| O  | -26.549647000 | -33.872509000 | 199.033554000 |
| O  | -27.680007000 | -37.278824000 | 199.897343000 |
| O  | -28.023968000 | -39.110981000 | 202.485568000 |

|   |               |               |               |
|---|---------------|---------------|---------------|
| H | -30.388787000 | -26.778168000 | 200.178550000 |
| C | -30.241434000 | -27.113395000 | 201.222163000 |
| H | -30.724377000 | -26.361921000 | 201.871645000 |
| C | -28.756819000 | -27.393992000 | 201.485423000 |
| C | -28.173112000 | -28.543461000 | 200.656877000 |
| O | -29.041355000 | -29.550802000 | 200.461596000 |
| O | -27.012871000 | -28.554980000 | 200.242646000 |
| C | -32.924381000 | -41.850903000 | 196.489835000 |
| C | -31.509571000 | -41.593539000 | 195.937849000 |
| C | -30.517754000 | -41.397236000 | 197.072688000 |
| C | -29.959572000 | -42.507837000 | 197.743215000 |
| C | -30.190428000 | -40.109225000 | 197.552423000 |
| C | -29.103993000 | -42.351029000 | 198.846851000 |
| C | -29.335129000 | -39.932223000 | 198.653026000 |
| C | -28.786635000 | -41.053689000 | 199.306533000 |
| O | -27.922553000 | -40.848506000 | 200.366994000 |
| H | -33.785375000 | -32.318034000 | 197.913159000 |
| C | -32.844739000 | -31.791422000 | 197.688620000 |
| C | -31.614812000 | -32.674047000 | 197.698371000 |
| O | -30.468566000 | -32.193630000 | 197.606565000 |
| H | -32.702471000 | -30.970144000 | 198.411186000 |
| N | -31.849500000 | -34.018970000 | 197.749187000 |
| C | -30.825021000 | -35.049751000 | 197.612821000 |
| C | -31.078646000 | -35.969909000 | 196.396505000 |
| O | -30.547567000 | -37.086844000 | 196.312553000 |
| C | -30.625195000 | -35.849986000 | 198.911686000 |
| C | -29.817105000 | -35.185432000 | 200.028017000 |
| O | -29.876518000 | -35.665363000 | 201.197057000 |
| O | -29.041338000 | -34.222198000 | 199.672765000 |
| N | -31.865852000 | -35.429814000 | 195.427043000 |
| C | -31.935591000 | -35.967611000 | 194.072817000 |
| H | -31.190723000 | -35.442656000 | 193.449429000 |
| H | -21.516057000 | -41.187718000 | 202.032943000 |
| C | -22.352883000 | -41.458335000 | 202.717392000 |
| C | -22.774457000 | -42.909071000 | 202.610140000 |
| O | -23.546315000 | -43.428382000 | 203.437058000 |
| C | -23.554369000 | -40.508777000 | 202.464210000 |
| C | -23.071842000 | -39.048924000 | 202.379707000 |
| C | -24.157095000 | -37.984079000 | 202.492901000 |
| O | -25.224822000 | -38.015555000 | 201.836028000 |
| O | -23.840360000 | -37.020310000 | 203.314756000 |
| N | -22.261634000 | -43.592366000 | 201.546286000 |
| C | -22.629343000 | -44.962153000 | 201.252063000 |
| H | -21.726399000 | -45.520632000 | 200.924621000 |
| C | -23.738585000 | -45.088641000 | 200.181657000 |
| C | -24.992553000 | -44.402930000 | 200.608289000 |
| C | -25.523481000 | -43.169076000 | 200.274283000 |
| N | -25.825704000 | -44.888901000 | 201.606319000 |
| C | -26.802563000 | -43.975981000 | 201.848324000 |
| N | -26.643448000 | -42.923244000 | 201.048629000 |
| H | -19.262626000 | -31.517297000 | 202.779917000 |
| C | -20.112713000 | -31.328697000 | 202.090235000 |
| C | -21.149506000 | -30.541282000 | 202.875501000 |
| O | -21.417116000 | -30.801357000 | 204.069583000 |
| C | -20.726868000 | -32.619085000 | 201.485340000 |
| C | -21.602786000 | -33.368343000 | 202.435567000 |
| C | -22.942641000 | -33.716550000 | 202.389445000 |
| N | -21.151905000 | -33.824317000 | 203.666476000 |
| C | -22.169597000 | -34.413487000 | 204.328370000 |
| N | -23.272567000 | -34.366326000 | 203.570636000 |
| N | -21.799491000 | -29.578807000 | 202.177034000 |
| C | -22.896307000 | -28.815019000 | 202.759171000 |
| H | -22.557559000 | -28.453986000 | 203.752878000 |
| C | -24.175846000 | -29.654427000 | 202.941385000 |
| C | -24.636852000 | -30.299949000 | 201.637586000 |
| C | -25.673736000 | -31.390748000 | 201.776885000 |
| O | -25.997485000 | -31.839100000 | 202.921578000 |
| O | -26.145774000 | -31.828056000 | 200.665501000 |
| H | -24.820896000 | -28.956318000 | 209.209199000 |
| C | -25.289739000 | -29.704836000 | 209.874338000 |
| H | -25.215628000 | -29.314217000 | 210.902923000 |
| C | -24.608277000 | -31.083718000 | 209.713365000 |
| C | -24.551791000 | -31.569947000 | 208.291743000 |

|   |               |               |               |
|---|---------------|---------------|---------------|
| C | -25.343847000 | -32.451673000 | 207.574380000 |
| N | -23.592755000 | -31.131878000 | 207.379631000 |
| C | -23.779499000 | -31.713085000 | 206.175624000 |
| N | -24.847521000 | -32.512924000 | 206.281836000 |
| H | -24.708982000 | -37.374838000 | 210.156821000 |
| C | -25.333665000 | -37.110846000 | 209.273415000 |
| C | -26.301704000 | -38.223803000 | 208.875925000 |
| O | -26.043879000 | -39.059875000 | 207.988623000 |
| C | -24.387037000 | -36.715146000 | 208.141370000 |
| C | -24.994664000 | -36.044135000 | 206.914674000 |
| O | -26.245439000 | -35.748459000 | 206.898470000 |
| O | -24.180787000 | -35.815475000 | 205.963802000 |
| N | -27.490256000 | -38.237320000 | 209.550328000 |
| C | -28.420988000 | -39.357108000 | 209.469748000 |
| C | -29.302357000 | -39.455413000 | 208.216244000 |
| O | -29.916370000 | -40.508980000 | 207.971884000 |
| N | -29.384337000 | -38.340203000 | 207.458459000 |
| C | -30.067059000 | -38.305137000 | 206.168632000 |
| C | -29.373629000 | -37.281158000 | 205.261857000 |
| O | -29.572343000 | -37.294197000 | 204.035628000 |
| O | -28.628113000 | -36.433290000 | 205.921863000 |
| O | -25.632336000 | -37.901224000 | 197.211790000 |
| O | -27.552691000 | -35.892620000 | 197.690975000 |
| O | -27.063399000 | -31.257344000 | 197.047755000 |
| O | -24.746735000 | -31.863212000 | 198.229783000 |
| O | -29.864856000 | -30.498783000 | 202.914163000 |
| O | -25.784412000 | -39.339163000 | 199.582898000 |
| O | -26.797043000 | -39.052707000 | 205.061973000 |
| H | -30.322908000 | -30.622857000 | 209.000959000 |
| C | -30.997751000 | -31.051074000 | 208.236197000 |
| H | -31.843803000 | -31.521736000 | 208.767318000 |
| C | -30.268143000 | -32.095626000 | 207.379723000 |
| C | -28.970705000 | -31.549535000 | 206.753448000 |
| C | -28.298486000 | -32.557158000 | 205.844093000 |
| O | -28.060871000 | -33.727140000 | 206.329131000 |
| O | -28.002025000 | -32.184274000 | 204.663415000 |
| H | -36.631329000 | -31.789494000 | 206.860468000 |
| C | -36.971479000 | -32.276075000 | 205.926511000 |
| C | -35.773280000 | -32.804899000 | 205.113378000 |
| C | -34.855540000 | -33.727704000 | 205.939325000 |
| C | -33.787510000 | -34.489411000 | 205.143337000 |
| N | -32.770655000 | -33.598107000 | 204.562059000 |
| C | -31.845916000 | -33.989637000 | 203.656093000 |
| N | -31.729193000 | -35.290705000 | 203.333830000 |
| N | -31.084720000 | -33.089972000 | 203.019635000 |
| O | -27.650241000 | -29.319397000 | 204.179901000 |
| H | -32.917589000 | -42.733310000 | 197.157628000 |
| H | -33.256816000 | -40.990148000 | 197.100609000 |
| H | -33.700323000 | -42.030393000 | 195.723193000 |
| H | -31.514933000 | -40.698769000 | 195.286559000 |
| H | -31.194051000 | -42.446150000 | 195.305273000 |
| H | -30.198131000 | -43.523378000 | 197.396585000 |
| H | -28.678434000 | -43.229154000 | 199.346627000 |
| H | -29.069246000 | -38.928606000 | 199.008819000 |
| H | -30.591447000 | -39.216435000 | 197.054531000 |
| H | -27.465253000 | -41.772805000 | 200.712088000 |
| H | -25.174410000 | -42.450777000 | 199.529625000 |
| H | -27.595648000 | -44.113411000 | 202.585048000 |
| H | -28.778110000 | -37.542568000 | 207.668375000 |
| H | -27.646406000 | -37.534660000 | 210.271230000 |
| H | -21.532638000 | -29.404947000 | 201.210136000 |
| H | -21.676199000 | -43.090596000 | 200.881186000 |
| H | -22.969159000 | -45.417583000 | 202.198828000 |
| H | -23.919530000 | -46.163254000 | 199.987642000 |
| H | -23.395844000 | -44.641986000 | 199.231231000 |
| H | -22.557968000 | -38.878895000 | 201.412083000 |
| H | -24.075156000 | -40.793019000 | 201.530362000 |
| H | -21.980484000 | -41.297463000 | 203.746731000 |
| H | -22.329067000 | -38.846726000 | 203.170767000 |
| H | -24.289696000 | -40.626497000 | 203.281229000 |
| H | -26.358940000 | -29.764588000 | 209.603521000 |
| H | -26.204328000 | -33.051692000 | 207.872097000 |
| H | -23.142251000 | -31.557975000 | 205.297733000 |



|   |               |               |               |
|---|---------------|---------------|---------------|
| H | -23.680136000 | -33.575834000 | 201.596646000 |
| H | -22.101612000 | -34.880332000 | 205.310764000 |
| H | -19.698083000 | -30.723999000 | 201.263260000 |
| H | -23.080116000 | -27.941386000 | 202.111901000 |
| H | -29.872540000 | -34.526684000 | 197.392617000 |
| H | -32.807498000 | -34.328898000 | 197.914126000 |
| H | -32.927109000 | -31.334155000 | 196.685808000 |
| H | -32.176100000 | -34.469029000 | 195.566638000 |
| H | -30.836979000 | -28.036816000 | 201.337034000 |
| H | -19.911860000 | -33.270033000 | 201.116038000 |
| H | -21.338811000 | -32.354560000 | 200.605006000 |
| H | -25.922723000 | -36.229058000 | 209.590942000 |
| H | -29.946172000 | -39.291659000 | 205.683459000 |
| C | -31.567704000 | -37.981581000 | 206.298644000 |
| H | -32.050814000 | -38.011301000 | 205.306030000 |
| H | -32.054625000 | -38.735163000 | 206.939910000 |
| H | -31.713163000 | -36.984893000 | 206.752959000 |
| H | -29.094060000 | -39.309731000 | 210.342847000 |
| H | -27.858742000 | -40.306732000 | 209.536504000 |
| H | -23.606183000 | -36.029682000 | 208.520440000 |
| H | -23.851124000 | -37.604473000 | 207.761633000 |
| H | -30.046124000 | -36.759728000 | 198.657897000 |
| H | -31.587254000 | -36.193768000 | 199.332156000 |
| H | -31.384770000 | -30.216788000 | 207.623280000 |
| H | -30.020976000 | -32.986099000 | 207.986915000 |
| H | -28.249121000 | -31.294214000 | 207.555655000 |
| H | -30.935257000 | -32.456940000 | 206.571390000 |
| H | -29.146859000 | -30.631588000 | 206.166373000 |
| H | -28.127690000 | -26.506956000 | 201.296137000 |
| H | -28.581676000 | -27.681352000 | 202.541576000 |
| H | -25.142746000 | -31.844240000 | 210.309875000 |
| H | -23.576293000 | -31.044771000 | 210.111172000 |
| H | -25.280616000 | -33.112923000 | 205.494579000 |
| H | -37.548238000 | -31.526089000 | 205.357493000 |
| H | -35.190063000 | -31.950181000 | 204.715827000 |
| H | -35.471630000 | -34.496732000 | 206.443735000 |
| H | -33.291913000 | -35.218718000 | 205.815374000 |
| H | -37.654951000 | -33.098174000 | 206.208572000 |
| H | -36.140988000 | -33.360104000 | 204.227190000 |
| H | -34.369370000 | -33.152236000 | 206.753667000 |
| H | -32.818541000 | -32.605065000 | 204.779263000 |
| H | -34.267654000 | -35.061629000 | 204.324721000 |
| H | -31.134369000 | -32.081738000 | 203.207122000 |
| H | -32.042533000 | -36.015833000 | 203.971681000 |
| H | -30.197536000 | -33.370358000 | 202.572275000 |
| H | -31.004216000 | -35.558503000 | 202.651986000 |
| H | -23.979853000 | -30.441545000 | 203.687264000 |
| H | -25.055446000 | -29.558294000 | 200.932013000 |
| H | -24.978526000 | -29.015158000 | 203.352198000 |
| H | -23.778610000 | -30.777984000 | 201.121480000 |
| H | -20.219820000 | -33.671844000 | 204.048773000 |
| H | -25.818326000 | -33.275420000 | 198.712416000 |
| H | -29.161504000 | -32.039937000 | 198.875809000 |
| H | -28.637319000 | -30.425140000 | 199.986667000 |
| H | -29.920123000 | -30.016868000 | 202.053793000 |
| H | -29.253410000 | -31.250818000 | 202.634434000 |
| H | -27.133398000 | -30.147155000 | 204.237587000 |
| H | -28.504431000 | -29.662677000 | 203.801043000 |
| H | -32.943787000 | -35.817994000 | 193.653612000 |
| H | -31.699813000 | -37.042701000 | 194.099216000 |
| H | -26.524121000 | -39.961431000 | 199.831904000 |
| H | -25.471513000 | -38.956709000 | 200.457874000 |
| H | -27.654363000 | -39.477364000 | 203.322551000 |
| H | -27.699532000 | -36.708205000 | 199.046465000 |
| H | -26.805427000 | -36.464007000 | 197.374297000 |
| H | -27.121637000 | -35.082961000 | 198.119009000 |
| H | -25.967395000 | -38.484830000 | 196.505434000 |
| H | -25.679147000 | -38.463245000 | 198.033204000 |
| H | -28.005071000 | -39.809677000 | 201.781732000 |
| H | -27.023317000 | -37.989514000 | 199.687077000 |
| H | -25.055403000 | -31.549611000 | 199.109363000 |
| H | -25.512659000 | -31.564792000 | 197.643165000 |
| H | -27.536774000 | -31.377475000 | 197.934596000 |

|   |               |               |               |
|---|---------------|---------------|---------------|
| H | -26.704670000 | -39.123290000 | 206.037207000 |
| H | -26.548099000 | -38.108887000 | 204.852024000 |
| H | -25.699232000 | -45.762536000 | 202.114976000 |
| H | -22.836886000 | -30.478662000 | 207.587708000 |
| C | -27.536249000 | -32.308401000 | 196.179003000 |
| H | -26.912529000 | -32.298828000 | 195.268386000 |
| H | -27.455156000 | -33.299633000 | 196.666431000 |
| H | -28.594408000 | -32.145495000 | 195.899436000 |

W9-1

|    |               |               |               |
|----|---------------|---------------|---------------|
| Mn | -24.899454000 | -35.555643000 | 203.890724000 |
| Mn | -27.337614000 | -35.231244000 | 205.231050000 |
| Mn | -27.325589000 | -33.340140000 | 203.180491000 |
| Mn | -27.583978000 | -33.167965000 | 200.445533000 |
| Ca | -27.898111000 | -36.780395000 | 202.194591000 |
| O  | -26.461896000 | -36.518483000 | 204.196830000 |
| O  | -28.365327000 | -34.720733000 | 203.814674000 |
| O  | -25.996079000 | -34.075489000 | 204.498865000 |
| O  | -28.496971000 | -32.591341000 | 202.016151000 |
| O  | -26.778427000 | -34.302400000 | 201.703336000 |
| O  | -28.428579000 | -31.690662000 | 199.325811000 |
| O  | -26.592741000 | -33.766315000 | 199.006170000 |
| O  | -27.531628000 | -37.084431000 | 199.859963000 |
| O  | -28.305026000 | -39.211020000 | 202.483796000 |
| H  | -30.457562000 | -26.819117000 | 200.177742000 |
| C  | -30.241434000 | -27.113395000 | 201.222163000 |
| H  | -30.724377000 | -26.361921000 | 201.871645000 |
| C  | -28.731897000 | -27.318815000 | 201.411373000 |
| C  | -28.184740000 | -28.471300000 | 200.549543000 |
| O  | -28.951263000 | -29.515867000 | 200.462137000 |
| O  | -27.054685000 | -28.363783000 | 199.998352000 |
| C  | -32.924381000 | -41.850903000 | 196.489835000 |
| C  | -31.867839000 | -40.803595000 | 196.085056000 |
| C  | -30.774751000 | -40.701897000 | 197.133955000 |
| C  | -29.830545000 | -41.743225000 | 197.269702000 |
| C  | -30.701205000 | -39.626322000 | 198.044655000 |
| C  | -28.854225000 | -41.724575000 | 198.275892000 |
| C  | -29.727330000 | -39.586922000 | 199.057727000 |
| C  | -28.807336000 | -40.644536000 | 199.182903000 |
| O  | -27.827354000 | -40.569875000 | 200.156275000 |
| H  | -33.785375000 | -32.318034000 | 197.913159000 |
| C  | -32.844739000 | -31.791422000 | 197.688620000 |
| C  | -31.618423000 | -32.679499000 | 197.690161000 |
| O  | -30.468583000 | -32.200806000 | 197.592005000 |
| H  | -32.697381000 | -30.974722000 | 198.415391000 |
| N  | -31.854672000 | -34.022907000 | 197.738310000 |
| C  | -30.825021000 | -35.049751000 | 197.612821000 |
| C  | -31.027890000 | -35.956618000 | 196.380150000 |
| O  | -30.416883000 | -37.032651000 | 196.258085000 |
| C  | -30.635493000 | -35.852895000 | 198.910439000 |
| C  | -29.831709000 | -35.206720000 | 200.044629000 |
| O  | -29.871772000 | -35.746614000 | 201.187789000 |
| O  | -29.087884000 | -34.203905000 | 199.733452000 |
| N  | -31.863866000 | -35.454095000 | 195.435453000 |
| C  | -31.935591000 | -35.967611000 | 194.072817000 |
| H  | -31.190723000 | -35.442656000 | 193.449429000 |
| H  | -21.516057000 | -41.187718000 | 202.032943000 |
| C  | -22.352883000 | -41.458335000 | 202.717393000 |
| C  | -22.663248000 | -42.938482000 | 202.673532000 |
| O  | -23.273147000 | -43.509286000 | 203.602162000 |
| C  | -23.610463000 | -40.600724000 | 202.416282000 |
| C  | -23.257274000 | -39.111997000 | 202.513350000 |
| C  | -24.399941000 | -38.097133000 | 202.481591000 |
| O  | -25.533708000 | -38.323495000 | 202.030918000 |
| O  | -23.996350000 | -36.930463000 | 202.960068000 |
| N  | -22.270533000 | -43.584765000 | 201.540199000 |
| C  | -22.629343000 | -44.962153000 | 201.252063000 |
| H  | -21.726399000 | -45.520632000 | 200.924621000 |
| C  | -23.763442000 | -45.082514000 | 200.213250000 |
| C  | -24.940208000 | -44.230301000 | 200.575564000 |
| C  | -25.685677000 | -43.321275000 | 199.842649000 |
| N  | -25.471298000 | -44.172538000 | 201.857725000 |

|   |               |               |               |
|---|---------------|---------------|---------------|
| C | -26.468037000 | -43.252351000 | 201.879811000 |
| N | -26.631636000 | -42.733055000 | 200.664089000 |
| H | -19.262626000 | -31.517297000 | 202.779917000 |
| C | -20.112713000 | -31.328697000 | 202.090235000 |
| C | -21.149633000 | -30.540033000 | 202.873936000 |
| O | -21.411209000 | -30.794193000 | 204.070448000 |
| C | -20.730584000 | -32.624485000 | 201.499968000 |
| C | -21.611632000 | -33.366918000 | 202.452252000 |
| C | -22.951020000 | -33.714935000 | 202.395974000 |
| N | -21.168933000 | -33.833237000 | 203.682389000 |
| C | -22.191558000 | -34.430525000 | 204.331728000 |
| N | -23.288807000 | -34.377595000 | 203.567196000 |
| N | -21.810701000 | -29.588298000 | 202.170602000 |
| C | -22.896307000 | -28.815019000 | 202.759171000 |
| H | -22.557559000 | -28.453986000 | 203.752878000 |
| C | -24.183922000 | -29.646301000 | 202.950809000 |
| C | -24.730648000 | -30.223565000 | 201.644439000 |
| C | -25.724618000 | -31.360166000 | 201.790675000 |
| O | -25.997088000 | -31.840178000 | 202.938591000 |
| O | -26.215518000 | -31.791009000 | 200.687929000 |
| H | -24.810895000 | -28.961022000 | 209.211023000 |
| C | -25.289739000 | -29.704836000 | 209.874338000 |
| H | -25.215628000 | -29.314217000 | 210.902923000 |
| C | -24.621273000 | -31.090566000 | 209.716641000 |
| C | -24.560843000 | -31.577341000 | 208.295328000 |
| C | -25.336200000 | -32.477354000 | 207.582436000 |
| N | -23.613156000 | -31.122113000 | 207.379509000 |
| C | -23.790916000 | -31.710017000 | 206.177654000 |
| N | -24.841355000 | -32.532565000 | 206.288626000 |
| H | -24.708982000 | -37.374838000 | 210.156821000 |
| C | -25.333665000 | -37.110846000 | 209.273415000 |
| C | -26.307394000 | -38.219119000 | 208.874773000 |
| O | -26.058789000 | -39.046979000 | 207.977378000 |
| C | -24.384621000 | -36.729829000 | 208.131684000 |
| C | -24.991258000 | -36.109037000 | 206.873565000 |
| O | -26.227770000 | -35.755035000 | 206.876312000 |
| O | -24.193723000 | -35.966815000 | 205.891595000 |
| N | -27.492416000 | -38.236011000 | 209.555276000 |
| C | -28.420988000 | -39.357108000 | 209.469748000 |
| C | -29.302852000 | -39.452655000 | 208.216482000 |
| O | -29.905037000 | -40.510461000 | 207.961830000 |
| N | -29.401052000 | -38.328955000 | 207.472744000 |
| C | -30.090414000 | -38.284410000 | 206.186794000 |
| C | -29.386427000 | -37.272379000 | 205.275046000 |
| O | -29.595874000 | -37.277385000 | 204.050511000 |
| O | -28.622460000 | -36.438391000 | 205.930494000 |
| O | -27.667568000 | -38.159161000 | 196.430941000 |
| O | -27.830983000 | -35.632581000 | 197.657100000 |
| O | -26.485305000 | -30.185921000 | 198.047987000 |
| O | -24.581061000 | -32.013802000 | 198.233222000 |
| O | -29.771484000 | -30.360874000 | 202.855614000 |
| O | -26.185448000 | -39.100831000 | 198.703332000 |
| O | -26.875984000 | -39.067425000 | 205.040511000 |
| H | -30.322086000 | -30.625560000 | 209.001763000 |
| C | -30.997751000 | -31.051074000 | 208.236197000 |
| H | -31.843803000 | -31.521736000 | 208.767318000 |
| C | -30.270745000 | -32.096774000 | 207.378243000 |
| C | -28.960172000 | -31.559772000 | 206.770302000 |
| C | -28.293214000 | -32.568148000 | 205.858625000 |
| O | -28.055851000 | -33.739467000 | 206.335236000 |
| O | -28.002517000 | -32.189369000 | 204.675834000 |
| H | -36.654911000 | -31.796710000 | 206.872435000 |
| C | -36.971479000 | -32.276075000 | 205.926511000 |
| C | -35.750300000 | -32.770192000 | 205.124845000 |
| C | -34.804136000 | -33.653873000 | 205.961644000 |
| C | -33.712051000 | -34.389497000 | 205.173557000 |
| N | -32.738022000 | -33.470472000 | 204.562117000 |
| C | -31.797440000 | -33.849222000 | 203.666659000 |
| N | -31.600132000 | -35.153701000 | 203.410115000 |
| N | -31.097821000 | -32.936503000 | 202.977412000 |
| O | -27.573369000 | -29.300484000 | 204.210098000 |
| H | -32.441059000 | -42.825337000 | 196.691608000 |
| H | -33.434968000 | -41.544615000 | 197.422149000 |

|   |               |               |               |
|---|---------------|---------------|---------------|
| H | -33.700323000 | -42.030393000 | 195.723193000 |
| H | -32.340334000 | -39.814108000 | 195.939330000 |
| H | -31.421198000 | -41.085975000 | 195.111309000 |
| H | -29.856186000 | -42.589588000 | 196.569360000 |
| H | -28.125909000 | -42.540124000 | 198.354260000 |
| H | -29.648443000 | -38.736706000 | 199.746333000 |
| H | -31.405055000 | -38.791274000 | 197.944832000 |
| H | -27.369584000 | -41.547786000 | 200.348588000 |
| H | -25.595899000 | -43.058059000 | 198.786622000 |
| H | -27.031978000 | -42.988344000 | 202.775892000 |
| H | -28.801160000 | -37.528579000 | 207.690877000 |
| H | -27.642328000 | -37.542739000 | 210.286525000 |
| H | -21.537947000 | -29.407298000 | 201.206753000 |
| H | -21.810984000 | -43.042398000 | 200.810305000 |
| H | -22.936704000 | -45.416349000 | 202.210424000 |
| H | -24.051228000 | -46.149163000 | 200.131167000 |
| H | -23.408222000 | -44.771269000 | 199.214662000 |
| H | -22.563357000 | -38.823761000 | 201.696797000 |
| H | -24.016956000 | -40.846656000 | 201.416715000 |
| H | -22.006315000 | -41.232243000 | 203.743069000 |
| H | -22.697996000 | -38.917383000 | 203.447425000 |
| H | -24.404249000 | -40.848172000 | 203.145339000 |
| H | -26.358327000 | -29.753857000 | 209.599097000 |
| H | -26.183897000 | -33.093831000 | 207.883403000 |
| H | -23.159613000 | -31.544098000 | 205.297625000 |
| H | -23.683917000 | -33.568292000 | 201.600365000 |
| H | -22.128943000 | -34.908601000 | 205.309199000 |
| H | -19.700100000 | -30.730588000 | 201.257698000 |
| H | -23.077899000 | -27.939363000 | 202.113732000 |
| H | -29.867754000 | -34.527878000 | 197.416182000 |
| H | -32.811430000 | -34.330018000 | 197.916896000 |
| H | -32.927321000 | -31.328527000 | 196.688488000 |
| H | -32.234877000 | -34.519766000 | 195.603670000 |
| H | -30.781277000 | -28.061179000 | 201.395157000 |
| H | -19.917634000 | -33.281249000 | 201.136485000 |
| H | -21.340886000 | -32.366860000 | 200.616353000 |
| H | -25.918582000 | -36.223755000 | 209.583198000 |
| H | -29.988191000 | -39.273274000 | 205.702478000 |
| C | -31.584655000 | -37.935068000 | 206.324592000 |
| H | -32.072890000 | -37.950408000 | 205.334106000 |
| H | -32.082853000 | -38.682546000 | 206.964420000 |
| H | -31.710468000 | -36.938565000 | 206.785463000 |
| H | -29.095537000 | -39.312496000 | 210.342065000 |
| H | -27.858742000 | -40.306732000 | 209.536504000 |
| H | -23.626813000 | -36.011246000 | 208.497638000 |
| H | -23.821766000 | -37.616891000 | 207.789484000 |
| H | -30.046860000 | -36.755030000 | 198.655607000 |
| H | -31.597839000 | -36.206170000 | 199.322933000 |
| H | -31.383199000 | -30.215172000 | 207.624682000 |
| H | -30.038413000 | -32.994264000 | 207.981038000 |
| H | -28.243662000 | -31.321465000 | 207.582076000 |
| H | -30.934029000 | -32.443536000 | 206.560435000 |
| H | -29.119634000 | -30.634680000 | 206.189416000 |
| H | -28.156465000 | -26.407048000 | 201.173965000 |
| H | -28.492819000 | -27.583851000 | 202.460824000 |
| H | -25.166617000 | -31.846290000 | 210.309256000 |
| H | -23.591211000 | -31.061679000 | 210.120466000 |
| H | -25.271477000 | -33.135019000 | 205.500955000 |
| H | -37.548238000 | -31.526089000 | 205.357493000 |
| H | -35.195720000 | -31.897242000 | 204.725730000 |
| H | -35.394916000 | -34.436888000 | 206.474722000 |
| H | -33.179452000 | -35.079052000 | 205.858899000 |
| H | -37.645302000 | -33.113448000 | 206.185132000 |
| H | -36.092991000 | -33.342731000 | 204.239656000 |
| H | -34.336684000 | -33.052518000 | 206.767914000 |
| H | -32.864634000 | -32.470945000 | 204.706231000 |
| H | -34.175065000 | -35.002694000 | 204.374556000 |
| H | -31.192338000 | -31.930805000 | 203.151547000 |
| H | -31.891322000 | -35.869023000 | 204.068787000 |
| H | -30.183744000 | -33.177998000 | 202.551242000 |
| H | -30.860535000 | -35.420879000 | 202.745396000 |
| H | -23.961832000 | -30.472668000 | 203.645589000 |
| H | -25.227588000 | -29.455207000 | 201.020257000 |

|   |               |               |               |
|---|---------------|---------------|---------------|
| H | -24.956021000 | -29.020876000 | 203.434995000 |
| H | -23.901591000 | -30.630184000 | 201.029172000 |
| H | -20.238948000 | -33.685470000 | 204.071643000 |
| H | -25.843975000 | -33.152247000 | 198.741853000 |
| H | -29.213531000 | -31.972268000 | 198.772056000 |
| H | -28.642444000 | -30.764768000 | 199.820507000 |
| H | -29.699149000 | -29.916948000 | 201.960498000 |
| H | -29.203362000 | -31.162310000 | 202.663993000 |
| H | -27.111824000 | -30.158634000 | 204.286134000 |
| H | -28.424923000 | -29.587417000 | 203.776485000 |
| H | -32.944737000 | -35.804482000 | 193.662117000 |
| H | -31.707711000 | -37.045079000 | 194.078677000 |
| H | -26.657126000 | -39.725031000 | 199.333047000 |
| H | -27.814085000 | -39.511615000 | 203.284351000 |
| H | -27.693574000 | -36.495664000 | 199.051484000 |
| H | -27.357917000 | -36.220438000 | 197.027552000 |
| H | -27.229106000 | -34.893969000 | 197.983740000 |
| H | -28.615768000 | -38.004648000 | 196.643306000 |
| H | -27.283518000 | -38.611787000 | 197.220117000 |
| H | -28.028647000 | -39.781176000 | 201.717242000 |
| H | -26.909802000 | -37.775084000 | 199.499053000 |
| H | -24.136295000 | -31.878791000 | 199.089087000 |
| H | -25.225636000 | -31.225259000 | 198.182616000 |
| H | -27.177885000 | -30.847788000 | 198.306481000 |
| H | -26.604432000 | -29.504703000 | 198.780681000 |
| H | -26.792830000 | -39.123344000 | 206.017315000 |
| H | -26.590038000 | -38.137658000 | 204.822344000 |
| H | -25.045218000 | -44.581550000 | 202.693311000 |
| H | -22.870642000 | -30.452627000 | 207.584088000 |
| C | -24.764954000 | -39.302120000 | 198.789300000 |
| H | -24.390561000 | -39.027785000 | 199.793194000 |
| H | -24.493930000 | -40.353993000 | 198.572033000 |
| H | -24.288775000 | -38.651687000 | 198.036961000 |

W10-1

|    |               |               |               |
|----|---------------|---------------|---------------|
| Mn | -24.858411000 | -35.564511000 | 203.949932000 |
| Mn | -27.331306000 | -35.225639000 | 205.226557000 |
| Mn | -27.310771000 | -33.341534000 | 203.163356000 |
| Mn | -27.562336000 | -33.173619000 | 200.426867000 |
| Ca | -27.889650000 | -36.712797000 | 202.197808000 |
| O  | -26.436453000 | -36.521119000 | 204.213917000 |
| O  | -28.351181000 | -34.723169000 | 203.805030000 |
| O  | -25.982416000 | -34.078057000 | 204.484340000 |
| O  | -28.484412000 | -32.603019000 | 201.997112000 |
| O  | -26.762270000 | -34.309186000 | 201.691372000 |
| O  | -28.413116000 | -31.696203000 | 199.317040000 |
| O  | -26.570307000 | -33.779557000 | 198.997446000 |
| O  | -27.711205000 | -37.257846000 | 199.874178000 |
| O  | -27.973755000 | -39.109844000 | 202.509451000 |
| H  | -30.451520000 | -26.813983000 | 200.177908000 |
| C  | -30.241434000 | -27.113395000 | 201.222163000 |
| H  | -30.724377000 | -26.361921000 | 201.871645000 |
| C  | -28.733699000 | -27.328122000 | 201.416772000 |
| C  | -28.185661000 | -28.479758000 | 200.553671000 |
| O  | -28.951353000 | -29.524581000 | 200.460231000 |
| O  | -27.053347000 | -28.371109000 | 200.006982000 |
| C  | -32.924381000 | -41.850903000 | 196.489835000 |
| C  | -31.733955000 | -40.967471000 | 196.062987000 |
| C  | -30.698929000 | -40.889803000 | 197.175354000 |
| C  | -29.779690000 | -41.943660000 | 197.374136000 |
| C  | -30.667883000 | -39.815458000 | 198.091607000 |
| C  | -28.865386000 | -41.935699000 | 198.440677000 |
| C  | -29.763168000 | -39.789875000 | 199.166163000 |
| C  | -28.859719000 | -40.854806000 | 199.348970000 |
| O  | -27.949068000 | -40.792611000 | 200.387441000 |
| H  | -33.785375000 | -32.318034000 | 197.913159000 |
| C  | -32.844739000 | -31.791422000 | 197.688620000 |
| C  | -31.613003000 | -32.671826000 | 197.700715000 |
| O  | -30.464275000 | -32.187311000 | 197.608529000 |
| H  | -32.704106000 | -30.967976000 | 198.409166000 |
| N  | -31.844359000 | -34.013495000 | 197.750728000 |
| C  | -30.825021000 | -35.049751000 | 197.612821000 |

|   |               |               |               |
|---|---------------|---------------|---------------|
| C | -31.097674000 | -35.979849000 | 196.405386000 |
| O | -30.602637000 | -37.113242000 | 196.340411000 |
| C | -30.626686000 | -35.848435000 | 198.913228000 |
| C | -29.816675000 | -35.193870000 | 200.033648000 |
| O | -29.877954000 | -35.683739000 | 201.197989000 |
| O | -29.033988000 | -34.231098000 | 199.688192000 |
| N | -31.866137000 | -35.426330000 | 195.426010000 |
| C | -31.935591000 | -35.967611000 | 194.072817000 |
| H | -31.190723000 | -35.442656000 | 193.449429000 |
| H | -21.516057000 | -41.187718000 | 202.032943000 |
| C | -22.352883000 | -41.458335000 | 202.717392000 |
| C | -22.776968000 | -42.908352000 | 202.611239000 |
| O | -23.558606000 | -43.423331000 | 203.431854000 |
| C | -23.555865000 | -40.507769000 | 202.459474000 |
| C | -23.068972000 | -39.051297000 | 202.315110000 |
| C | -24.145651000 | -37.978186000 | 202.447224000 |
| O | -25.195844000 | -37.966361000 | 201.762708000 |
| O | -23.841386000 | -37.055416000 | 203.322158000 |
| N | -22.257188000 | -43.594616000 | 201.553239000 |
| C | -22.629343000 | -44.962153000 | 201.252063000 |
| H | -21.726399000 | -45.520632000 | 200.924621000 |
| C | -23.723781000 | -45.076940000 | 200.164528000 |
| C | -24.985587000 | -44.381211000 | 200.553349000 |
| C | -25.539778000 | -43.179881000 | 200.144283000 |
| N | -25.827386000 | -44.834932000 | 201.559279000 |
| C | -26.830786000 | -43.936634000 | 201.734732000 |
| N | -26.682694000 | -42.924487000 | 200.882033000 |
| H | -19.262626000 | -31.517297000 | 202.779917000 |
| C | -20.112713000 | -31.328697000 | 202.090235000 |
| C | -21.154332000 | -30.546151000 | 202.873652000 |
| O | -21.422715000 | -30.808243000 | 204.066928000 |
| C | -20.725032000 | -32.620211000 | 201.485388000 |
| C | -21.596568000 | -33.376387000 | 202.434739000 |
| C | -22.937289000 | -33.722339000 | 202.394007000 |
| N | -21.137215000 | -33.850813000 | 203.655362000 |
| C | -22.149897000 | -34.450444000 | 204.315457000 |
| N | -23.258725000 | -34.391398000 | 203.566950000 |
| N | -21.810280000 | -29.589431000 | 202.172292000 |
| C | -22.896307000 | -28.815019000 | 202.759171000 |
| H | -22.557559000 | -28.453986000 | 203.752878000 |
| C | -24.184925000 | -29.645017000 | 202.946312000 |
| C | -24.728029000 | -30.218781000 | 201.636799000 |
| C | -25.715385000 | -31.360744000 | 201.777335000 |
| O | -25.989726000 | -31.842445000 | 202.925109000 |
| O | -26.200376000 | -31.794680000 | 200.674233000 |
| H | -24.812163000 | -28.960005000 | 209.211221000 |
| C | -25.289739000 | -29.704836000 | 209.874338000 |
| H | -25.215628000 | -29.314217000 | 210.902923000 |
| C | -24.620308000 | -31.089642000 | 209.713867000 |
| C | -24.558857000 | -31.571628000 | 208.290959000 |
| C | -25.339608000 | -32.461848000 | 207.571820000 |
| N | -23.604407000 | -31.120687000 | 207.380220000 |
| C | -23.782454000 | -31.702079000 | 206.175342000 |
| N | -24.840852000 | -32.515248000 | 206.279444000 |
| H | -24.708982000 | -37.374838000 | 210.156821000 |
| C | -25.333665000 | -37.110846000 | 209.273415000 |
| C | -26.301833000 | -38.223859000 | 208.877560000 |
| O | -26.043660000 | -39.060605000 | 207.990551000 |
| C | -24.384972000 | -36.718756000 | 208.141717000 |
| C | -24.989744000 | -36.055524000 | 206.910101000 |
| O | -26.238926000 | -35.752959000 | 206.891391000 |
| O | -24.175573000 | -35.838474000 | 205.956284000 |
| N | -27.490149000 | -38.237331000 | 209.551536000 |
| C | -28.420988000 | -39.357108000 | 209.469748000 |
| C | -29.301490000 | -39.453633000 | 208.215174000 |
| O | -29.915309000 | -40.506646000 | 207.968813000 |
| N | -29.382763000 | -38.337091000 | 207.458864000 |
| C | -30.068083000 | -38.298309000 | 206.170605000 |
| C | -29.368669000 | -37.282700000 | 205.259376000 |
| O | -29.567801000 | -37.296853000 | 204.032948000 |
| O | -28.620539000 | -36.434786000 | 205.916736000 |
| O | -26.275761000 | -38.183120000 | 196.988912000 |
| O | -27.611217000 | -35.822237000 | 197.677907000 |

|   |               |               |               |
|---|---------------|---------------|---------------|
| O | -26.455834000 | -30.189361000 | 198.058818000 |
| O | -24.571204000 | -32.043080000 | 198.205296000 |
| O | -29.788988000 | -30.394972000 | 202.838474000 |
| O | -25.834230000 | -39.312475000 | 199.517955000 |
| O | -26.803985000 | -39.052490000 | 205.097439000 |
| H | -30.321630000 | -30.624081000 | 209.000423000 |
| C | -30.997751000 | -31.051074000 | 208.236197000 |
| H | -31.843803000 | -31.521736000 | 208.767318000 |
| C | -30.270292000 | -32.097682000 | 207.377681000 |
| C | -28.972543000 | -31.555413000 | 206.746380000 |
| C | -28.297541000 | -32.565004000 | 205.840464000 |
| O | -28.057764000 | -33.734570000 | 206.322180000 |
| O | -27.997027000 | -32.190017000 | 204.659394000 |
| H | -36.653793000 | -31.796110000 | 206.871777000 |
| C | -36.971479000 | -32.276075000 | 205.926511000 |
| C | -35.751563000 | -32.773786000 | 205.125663000 |
| C | -34.811136000 | -33.662164000 | 205.963825000 |
| C | -33.724307000 | -34.406470000 | 205.177188000 |
| N | -32.739633000 | -33.496716000 | 204.568994000 |
| C | -31.806246000 | -33.883932000 | 203.669906000 |
| N | -31.634036000 | -35.189450000 | 203.400449000 |
| N | -31.086648000 | -32.979011000 | 202.991677000 |
| O | -27.598710000 | -29.306531000 | 204.187944000 |
| H | -32.557525000 | -42.846460000 | 196.805568000 |
| H | -33.428964000 | -41.407696000 | 197.369530000 |
| H | -33.700323000 | -42.030393000 | 195.723193000 |
| H | -32.079260000 | -39.948039000 | 195.806406000 |
| H | -31.267162000 | -41.384809000 | 195.149479000 |
| H | -29.772576000 | -42.791771000 | 196.675025000 |
| H | -28.148755000 | -42.756669000 | 198.563383000 |
| H | -29.711941000 | -38.930219000 | 199.845457000 |
| H | -31.337890000 | -38.960693000 | 197.937727000 |
| H | -27.479493000 | -41.757387000 | 200.611494000 |
| H | -25.191139000 | -42.491336000 | 199.371818000 |
| H | -27.632147000 | -44.052384000 | 202.466138000 |
| H | -28.778492000 | -37.539324000 | 207.673071000 |
| H | -27.646447000 | -37.535058000 | 210.272840000 |
| H | -21.529368000 | -29.401399000 | 201.212150000 |
| H | -21.664682000 | -43.094758000 | 200.892927000 |
| H | -22.979448000 | -45.420927000 | 202.193222000 |
| H | -23.910794000 | -46.150423000 | 199.968497000 |
| H | -23.358111000 | -44.637212000 | 199.219406000 |
| H | -22.596903000 | -38.912889000 | 201.321980000 |
| H | -24.098683000 | -40.817671000 | 201.546212000 |
| H | -21.981647000 | -41.293993000 | 203.746462000 |
| H | -22.293700000 | -38.834994000 | 203.070257000 |
| H | -24.273480000 | -40.595718000 | 203.295704000 |
| H | -26.358471000 | -29.754494000 | 209.599719000 |
| H | -26.193542000 | -33.071840000 | 207.868103000 |
| H | -23.146237000 | -31.538188000 | 205.298140000 |
| H | -23.682593000 | -33.567146000 | 201.611454000 |
| H | -22.074163000 | -34.931698000 | 205.290348000 |
| H | -19.698992000 | -30.723319000 | 201.263348000 |
| H | -23.075085000 | -27.939014000 | 202.113436000 |
| H | -29.869738000 | -34.538525000 | 197.382977000 |
| H | -32.805373000 | -34.321742000 | 197.901519000 |
| H | -32.925655000 | -31.335844000 | 196.684856000 |
| H | -32.137150000 | -34.451583000 | 195.549351000 |
| H | -30.786947000 | -28.059329000 | 201.388410000 |
| H | -19.910003000 | -33.268244000 | 201.111176000 |
| H | -21.339742000 | -32.354751000 | 200.607226000 |
| H | -25.921753000 | -36.228060000 | 209.589742000 |
| H | -29.958788000 | -39.287122000 | 205.687615000 |
| C | -31.564930000 | -37.957872000 | 206.303416000 |
| H | -32.050398000 | -37.980832000 | 205.311762000 |
| H | -32.059345000 | -38.706191000 | 206.945126000 |
| H | -31.698186000 | -36.960309000 | 206.759780000 |
| H | -29.094723000 | -39.309967000 | 210.342307000 |
| H | -27.858742000 | -40.306732000 | 209.536504000 |
| H | -23.606972000 | -36.029216000 | 208.519429000 |
| H | -23.845319000 | -37.608415000 | 207.768223000 |
| H | -30.049972000 | -36.760189000 | 198.658710000 |
| H | -31.589479000 | -36.191265000 | 199.332978000 |

|   |               |               |               |
|---|---------------|---------------|---------------|
| H | -31.384483000 | -30.216412000 | 207.623701000 |
| H | -30.022703000 | -32.987448000 | 207.985805000 |
| H | -28.249469000 | -31.296772000 | 207.546299000 |
| H | -30.940609000 | -32.458302000 | 206.571734000 |
| H | -29.148349000 | -30.639611000 | 206.155580000 |
| H | -28.152947000 | -26.418234000 | 201.185083000 |
| H | -28.500063000 | -27.597895000 | 202.466150000 |
| H | -25.165597000 | -31.847324000 | 210.304024000 |
| H | -23.590428000 | -31.061422000 | 210.118080000 |
| H | -25.263732000 | -33.118188000 | 205.492153000 |
| H | -37.548238000 | -31.526089000 | 205.357493000 |
| H | -35.192395000 | -31.903370000 | 204.727569000 |
| H | -35.407227000 | -34.440485000 | 206.477917000 |
| H | -33.200546000 | -35.103251000 | 205.862099000 |
| H | -37.646408000 | -33.112113000 | 206.186720000 |
| H | -36.095487000 | -33.344622000 | 204.239871000 |
| H | -34.340072000 | -33.063219000 | 206.769863000 |
| H | -32.841423000 | -32.497331000 | 204.732310000 |
| H | -34.191796000 | -35.012725000 | 204.375641000 |
| H | -31.170383000 | -31.970428000 | 203.156503000 |
| H | -31.939326000 | -35.906554000 | 204.050469000 |
| H | -30.184038000 | -33.237768000 | 202.556066000 |
| H | -30.913908000 | -35.461161000 | 202.716107000 |
| H | -23.965745000 | -30.472590000 | 203.640486000 |
| H | -25.230261000 | -29.450118000 | 201.017270000 |
| H | -24.957537000 | -29.019371000 | 203.429320000 |
| H | -23.898792000 | -30.617957000 | 201.017398000 |
| H | -20.200703000 | -33.708863000 | 204.031108000 |
| H | -25.807798000 | -33.179313000 | 198.736202000 |
| H | -29.199541000 | -31.974742000 | 198.761799000 |
| H | -28.630496000 | -30.772988000 | 199.815804000 |
| H | -29.716883000 | -29.938833000 | 201.949527000 |
| H | -29.211374000 | -31.188200000 | 202.638431000 |
| H | -27.126814000 | -30.158259000 | 204.270941000 |
| H | -28.448068000 | -29.607904000 | 203.760037000 |
| H | -32.943648000 | -35.821525000 | 193.651454000 |
| H | -31.697174000 | -37.042041000 | 194.103435000 |
| H | -26.545941000 | -39.936697000 | 199.832852000 |
| H | -25.476493000 | -38.901357000 | 200.360141000 |
| H | -27.646799000 | -39.476979000 | 203.363342000 |
| H | -27.736072000 | -36.676236000 | 199.035254000 |
| H | -26.920549000 | -36.422382000 | 197.297313000 |
| H | -27.136066000 | -35.027007000 | 198.076459000 |
| H | -26.023822000 | -38.558900000 | 197.871802000 |
| H | -27.979482000 | -39.822290000 | 201.816301000 |
| H | -27.094468000 | -37.993665000 | 199.632335000 |
| H | -24.037688000 | -31.902405000 | 199.007721000 |
| H | -25.202957000 | -31.243321000 | 198.193962000 |
| H | -27.150743000 | -30.852537000 | 198.306808000 |
| H | -26.584738000 | -29.511901000 | 198.793044000 |
| H | -26.700043000 | -39.116819000 | 206.072525000 |
| H | -26.550045000 | -38.113509000 | 204.875983000 |
| H | -25.690350000 | -45.677220000 | 202.115876000 |
| H | -22.857208000 | -30.458114000 | 207.590137000 |
| C | -27.514691000 | -38.825806000 | 196.596586000 |
| H | -27.517011000 | -39.901356000 | 196.857337000 |
| H | -28.394747000 | -38.348633000 | 197.067850000 |
| H | -27.611323000 | -38.723387000 | 195.502067000 |

W10-2

|    |               |               |               |
|----|---------------|---------------|---------------|
| Mn | -24.875176000 | -35.505877000 | 203.945445000 |
| Mn | -27.339726000 | -35.210223000 | 205.236455000 |
| Mn | -27.330186000 | -33.334469000 | 203.162833000 |
| Mn | -27.554750000 | -33.157748000 | 200.426110000 |
| Ca | -27.922260000 | -36.735375000 | 202.231506000 |
| O  | -26.434395000 | -36.490995000 | 204.221770000 |
| O  | -28.359161000 | -34.721858000 | 203.806004000 |
| O  | -26.005339000 | -34.043896000 | 204.496392000 |
| O  | -28.508564000 | -32.618410000 | 201.985910000 |
| O  | -26.746171000 | -34.290431000 | 201.692042000 |
| O  | -28.430509000 | -31.695087000 | 199.318357000 |
| O  | -26.533635000 | -33.699229000 | 198.997655000 |



|   |               |               |               |
|---|---------------|---------------|---------------|
| O | -27.580679000 | -37.258558000 | 199.915812000 |
| O | -28.145099000 | -39.153171000 | 202.474531000 |
| H | -30.461885000 | -26.819741000 | 200.178362000 |
| C | -30.241434000 | -27.113395000 | 201.222163000 |
| H | -30.724377000 | -26.361921000 | 201.871645000 |
| C | -28.731420000 | -27.323361000 | 201.402159000 |
| C | -28.191839000 | -28.477386000 | 200.536669000 |
| O | -28.961502000 | -29.519964000 | 200.450287000 |
| O | -27.062737000 | -28.374065000 | 199.982698000 |
| C | -32.924381000 | -41.850903000 | 196.489835000 |
| C | -31.531524000 | -41.505549000 | 195.931090000 |
| C | -30.530254000 | -41.321541000 | 197.058877000 |
| C | -29.925206000 | -42.439191000 | 197.674513000 |
| C | -30.236136000 | -40.043455000 | 197.583923000 |
| C | -29.054415000 | -42.298517000 | 198.767998000 |
| C | -29.366163000 | -39.882417000 | 198.675345000 |
| C | -28.770262000 | -41.010589000 | 199.272745000 |
| O | -27.890456000 | -40.817199000 | 200.321567000 |
| H | -33.785375000 | -32.318034000 | 197.913159000 |
| C | -32.844739000 | -31.791422000 | 197.688620000 |
| C | -31.619435000 | -32.680189000 | 197.700790000 |
| O | -30.468701000 | -32.203631000 | 197.597758000 |
| H | -32.700073000 | -30.969520000 | 198.409972000 |
| N | -31.852437000 | -34.023547000 | 197.764478000 |
| C | -30.825021000 | -35.049751000 | 197.612821000 |
| C | -31.063006000 | -35.957181000 | 196.384826000 |
| O | -30.485393000 | -37.049735000 | 196.282851000 |
| C | -30.598872000 | -35.860924000 | 198.901038000 |
| C | -29.773336000 | -35.204623000 | 200.009730000 |
| O | -29.849793000 | -35.663955000 | 201.184692000 |
| O | -28.963635000 | -34.272819000 | 199.641435000 |
| N | -31.875315000 | -35.435255000 | 195.429455000 |
| C | -31.935591000 | -35.967611000 | 194.072817000 |
| H | -31.190723000 | -35.442656000 | 193.449429000 |
| H | -21.516057000 | -41.187718000 | 202.032943000 |
| C | -22.352883000 | -41.458335000 | 202.717392000 |
| C | -22.772256000 | -42.910126000 | 202.608612000 |
| O | -23.542560000 | -43.430304000 | 203.436555000 |
| C | -23.557370000 | -40.518357000 | 202.472985000 |
| C | -23.104944000 | -39.053227000 | 202.515767000 |
| C | -24.210087000 | -38.012819000 | 202.609252000 |
| O | -25.340670000 | -38.154775000 | 202.088303000 |
| O | -23.837039000 | -36.939431000 | 203.250886000 |
| N | -22.260208000 | -43.592666000 | 201.544719000 |
| C | -22.629343000 | -44.962153000 | 201.252063000 |
| H | -21.726399000 | -45.520632000 | 200.924621000 |
| C | -23.736615000 | -45.088719000 | 200.179772000 |
| C | -24.987442000 | -44.391298000 | 200.596094000 |
| C | -25.507231000 | -43.156316000 | 200.249513000 |
| N | -25.830380000 | -44.863833000 | 201.592419000 |
| C | -26.802770000 | -43.942877000 | 201.820833000 |
| N | -26.630791000 | -42.897266000 | 201.014174000 |
| H | -19.262626000 | -31.517297000 | 202.779917000 |
| C | -20.112713000 | -31.328697000 | 202.090235000 |
| C | -21.157430000 | -30.549497000 | 202.873197000 |
| O | -21.424412000 | -30.810117000 | 204.066881000 |
| C | -20.721347000 | -32.618398000 | 201.477563000 |
| C | -21.602688000 | -33.364996000 | 202.424010000 |
| C | -22.954123000 | -33.667930000 | 202.399476000 |
| N | -21.144231000 | -33.851035000 | 203.640230000 |
| C | -22.167568000 | -34.415632000 | 204.313830000 |
| N | -23.282665000 | -34.321497000 | 203.578804000 |
| N | -21.818085000 | -29.597242000 | 202.169747000 |
| C | -22.896307000 | -28.815019000 | 202.759171000 |
| H | -22.557559000 | -28.453986000 | 203.752878000 |
| C | -24.188929000 | -29.634312000 | 202.959482000 |
| C | -24.761350000 | -30.184009000 | 201.654066000 |
| C | -25.746080000 | -31.326835000 | 201.794835000 |
| O | -26.016740000 | -31.819091000 | 202.938831000 |
| O | -26.234134000 | -31.751694000 | 200.690754000 |
| H | -24.821265000 | -28.956143000 | 209.209195000 |
| C | -25.289739000 | -29.704836000 | 209.874338000 |
| H | -25.215628000 | -29.314217000 | 210.902923000 |

|   |               |               |               |
|---|---------------|---------------|---------------|
| C | -24.606329000 | -31.082545000 | 209.716118000 |
| C | -24.546247000 | -31.562922000 | 208.293622000 |
| C | -25.336584000 | -32.441074000 | 207.570741000 |
| N | -23.589058000 | -31.115093000 | 207.384464000 |
| C | -23.774291000 | -31.687264000 | 206.176317000 |
| N | -24.840400000 | -32.490459000 | 206.277653000 |
| H | -24.708982000 | -37.374838000 | 210.156821000 |
| C | -25.333665000 | -37.110846000 | 209.273415000 |
| C | -26.305598000 | -38.219446000 | 208.872731000 |
| O | -26.055937000 | -39.046296000 | 207.974548000 |
| C | -24.389304000 | -36.712034000 | 208.138461000 |
| C | -24.995727000 | -36.037811000 | 206.911387000 |
| O | -26.244776000 | -35.731779000 | 206.898617000 |
| O | -24.184583000 | -35.814760000 | 205.956690000 |
| N | -27.490026000 | -38.237359000 | 209.554276000 |
| C | -28.420988000 | -39.357108000 | 209.469748000 |
| C | -29.303716000 | -39.448399000 | 208.217504000 |
| O | -29.909452000 | -40.503307000 | 207.960412000 |
| N | -29.399005000 | -38.322106000 | 207.476926000 |
| C | -30.090939000 | -38.272953000 | 206.193251000 |
| C | -29.386304000 | -37.263939000 | 205.279951000 |
| O | -29.594689000 | -37.275784000 | 204.054802000 |
| O | -28.622982000 | -36.425359000 | 205.930675000 |
| O | -24.611506000 | -37.015849000 | 198.538954000 |
| O | -27.061821000 | -35.923927000 | 197.733801000 |
| O | -26.429238000 | -30.223636000 | 198.064666000 |
| O | -24.486499000 | -32.010435000 | 198.294241000 |
| O | -29.787414000 | -30.386052000 | 202.832752000 |
| O | -25.690570000 | -39.317645000 | 199.754076000 |
| O | -26.848789000 | -39.044388000 | 205.058129000 |
| H | -30.318990000 | -30.629741000 | 209.001267000 |
| C | -30.997751000 | -31.051074000 | 208.236197000 |
| H | -31.843803000 | -31.521736000 | 208.767318000 |
| C | -30.275525000 | -32.092208000 | 207.371400000 |
| C | -28.980668000 | -31.543073000 | 206.742442000 |
| C | -28.313679000 | -32.553129000 | 205.834764000 |
| O | -28.066992000 | -33.718695000 | 206.322839000 |
| O | -28.033331000 | -32.185000000 | 204.647151000 |
| H | -36.645868000 | -31.794307000 | 206.868110000 |
| C | -36.971479000 | -32.276075000 | 205.926511000 |
| C | -35.759277000 | -32.781731000 | 205.119292000 |
| C | -34.823439000 | -33.682248000 | 205.949330000 |
| C | -33.739275000 | -34.422258000 | 205.154871000 |
| N | -32.752684000 | -33.507699000 | 204.557042000 |
| C | -31.823702000 | -33.882743000 | 203.648902000 |
| N | -31.657249000 | -35.184642000 | 203.355949000 |
| N | -31.104807000 | -32.968673000 | 202.982585000 |
| O | -27.594990000 | -29.297048000 | 204.177030000 |
| H | -32.868994000 | -42.761976000 | 197.115450000 |
| H | -33.286925000 | -41.034985000 | 197.143389000 |
| H | -33.700323000 | -42.030393000 | 195.723193000 |
| H | -31.585063000 | -40.581760000 | 195.324126000 |
| H | -31.190622000 | -42.312364000 | 195.253277000 |
| H | -30.136553000 | -43.447174000 | 197.290363000 |
| H | -28.589833000 | -43.181307000 | 199.222669000 |
| H | -29.117862000 | -38.886244000 | 199.064212000 |
| H | -30.670393000 | -39.146555000 | 197.122965000 |
| H | -27.438847000 | -41.747457000 | 200.667704000 |
| H | -25.147771000 | -42.446306000 | 199.502011000 |
| H | -27.602050000 | -44.068959000 | 202.552791000 |
| H | -28.798073000 | -37.523866000 | 207.698436000 |
| H | -27.638735000 | -37.544292000 | 210.286015000 |
| H | -21.531292000 | -29.403298000 | 201.212536000 |
| H | -21.677571000 | -43.090442000 | 200.877480000 |
| H | -22.969831000 | -45.416296000 | 202.199068000 |
| H | -23.923996000 | -46.163310000 | 199.992076000 |
| H | -23.387861000 | -44.650973000 | 199.227357000 |
| H | -22.517127000 | -38.804482000 | 201.608056000 |
| H | -24.026873000 | -40.749440000 | 201.498523000 |
| H | -21.979902000 | -41.303549000 | 203.747773000 |
| H | -22.425938000 | -38.880156000 | 203.369792000 |
| H | -24.326683000 | -40.703600000 | 203.244874000 |
| H | -26.358718000 | -29.766056000 | 209.603207000 |

|   |               |               |               |
|---|---------------|---------------|---------------|
| H | -26.195643000 | -33.045218000 | 207.864264000 |
| H | -23.137464000 | -31.524149000 | 205.299386000 |
| H | -23.706854000 | -33.487779000 | 201.629384000 |
| H | -22.095450000 | -34.902537000 | 205.286215000 |
| H | -19.698187000 | -30.718953000 | 201.266835000 |
| H | -23.073478000 | -27.939427000 | 202.112516000 |
| H | -29.883428000 | -34.508990000 | 197.389006000 |
| H | -32.810125000 | -34.334986000 | 197.929461000 |
| H | -32.923254000 | -31.336323000 | 196.684622000 |
| H | -32.214691000 | -34.485546000 | 195.576164000 |
| H | -30.782123000 | -28.060580000 | 201.396704000 |
| H | -19.905694000 | -33.269534000 | 201.110822000 |
| H | -21.327246000 | -32.350289000 | 200.594049000 |
| H | -25.921726000 | -36.228965000 | 209.593003000 |
| H | -29.993838000 | -39.261903000 | 205.708006000 |
| C | -31.583785000 | -37.918711000 | 206.335248000 |
| H | -32.075421000 | -37.933555000 | 205.346477000 |
| H | -32.081518000 | -38.664870000 | 206.976926000 |
| H | -31.705423000 | -36.921688000 | 206.795841000 |
| H | -29.094109000 | -39.311281000 | 210.343026000 |
| H | -27.858742000 | -40.306732000 | 209.536504000 |
| H | -23.608000000 | -36.027123000 | 208.517759000 |
| H | -23.853289000 | -37.600264000 | 207.756417000 |
| H | -30.019180000 | -36.765647000 | 198.628102000 |
| H | -31.550577000 | -36.214883000 | 199.335050000 |
| H | -31.384175000 | -30.211770000 | 207.629813000 |
| H | -30.025591000 | -32.985546000 | 207.973186000 |
| H | -28.256854000 | -31.287741000 | 207.542531000 |
| H | -30.947200000 | -32.447922000 | 206.564377000 |
| H | -29.158557000 | -30.625852000 | 206.154652000 |
| H | -28.154600000 | -26.413362000 | 201.161286000 |
| H | -28.485660000 | -27.590115000 | 202.449643000 |
| H | -25.142320000 | -31.844414000 | 210.309412000 |
| H | -23.575618000 | -31.042880000 | 210.117007000 |
| H | -25.269986000 | -33.088809000 | 205.491911000 |
| H | -37.548238000 | -31.526089000 | 205.357493000 |
| H | -35.193805000 | -31.914653000 | 204.722758000 |
| H | -35.422842000 | -34.463037000 | 206.455702000 |
| H | -33.217692000 | -35.128434000 | 205.831677000 |
| H | -37.648695000 | -33.108166000 | 206.193461000 |
| H | -36.111653000 | -33.345683000 | 204.232395000 |
| H | -34.349896000 | -33.093070000 | 206.761149000 |
| H | -32.846865000 | -32.511139000 | 204.740848000 |
| H | -34.208036000 | -35.017758000 | 204.346174000 |
| H | -31.192560000 | -31.962879000 | 203.158949000 |
| H | -31.946300000 | -35.909800000 | 204.004952000 |
| H | -30.201627000 | -33.220347000 | 202.542458000 |
| H | -30.934268000 | -35.444864000 | 202.670369000 |
| H | -23.964795000 | -30.472868000 | 203.638912000 |
| H | -25.274719000 | -29.405008000 | 201.056663000 |
| H | -24.944959000 | -29.006467000 | 203.465179000 |
| H | -23.946688000 | -30.573012000 | 201.009597000 |
| H | -20.198689000 | -33.739152000 | 204.003531000 |
| H | -25.722957000 | -33.135833000 | 198.810721000 |
| H | -29.210404000 | -31.976207000 | 198.757166000 |
| H | -28.646666000 | -30.766924000 | 199.809084000 |
| H | -29.713488000 | -29.933542000 | 201.941993000 |
| H | -29.221584000 | -31.187054000 | 202.635041000 |
| H | -27.110532000 | -30.142461000 | 204.249722000 |
| H | -28.443919000 | -29.604685000 | 203.752342000 |
| H | -32.942965000 | -35.818544000 | 193.651911000 |
| H | -31.698905000 | -37.042576000 | 194.095483000 |
| H | -26.455757000 | -39.954170000 | 199.815626000 |
| H | -25.518170000 | -39.064533000 | 200.710215000 |
| H | -27.729513000 | -39.510478000 | 203.293304000 |
| H | -27.490136000 | -36.699374000 | 199.060206000 |
| H | -26.144188000 | -36.304651000 | 197.751746000 |
| H | -26.911646000 | -35.010631000 | 198.145569000 |
| H | -24.940859000 | -37.884887000 | 198.884365000 |
| H | -28.064562000 | -39.829578000 | 201.750346000 |
| H | -26.952930000 | -38.009898000 | 199.749684000 |
| H | -23.918915000 | -31.770100000 | 199.047922000 |
| H | -25.147947000 | -31.235497000 | 198.238179000 |

|   |               |               |               |
|---|---------------|---------------|---------------|
| H | -27.125541000 | -30.886802000 | 198.307456000 |
| H | -26.576599000 | -29.536056000 | 198.785274000 |
| H | -26.755833000 | -39.109403000 | 206.033799000 |
| H | -26.564918000 | -38.113725000 | 204.842843000 |
| H | -25.713711000 | -45.734644000 | 202.108220000 |
| H | -22.835588000 | -30.460640000 | 207.597387000 |
| C | -24.337188000 | -36.154902000 | 199.663255000 |
| H | -25.240566000 | -35.966246000 | 200.277041000 |
| H | -23.535891000 | -36.566894000 | 200.308700000 |
| H | -24.001102000 | -35.187429000 | 199.254376000 |

W11-1

|    |               |               |               |
|----|---------------|---------------|---------------|
| Mn | -24.862989000 | -35.499307000 | 203.965592000 |
| Mn | -27.334708000 | -35.199582000 | 205.250448000 |
| Mn | -27.334205000 | -33.330905000 | 203.167810000 |
| Mn | -27.503824000 | -33.219723000 | 200.418052000 |
| Ca | -27.892774000 | -36.712338000 | 202.253742000 |
| O  | -26.422831000 | -36.486077000 | 204.245550000 |
| O  | -28.359298000 | -34.716379000 | 203.822658000 |
| O  | -26.002328000 | -34.035273000 | 204.506862000 |
| O  | -28.488380000 | -32.629005000 | 201.970547000 |
| O  | -26.734400000 | -34.318294000 | 201.727156000 |
| O  | -28.355570000 | -31.732484000 | 199.288666000 |
| O  | -26.485756000 | -33.825349000 | 199.039827000 |
| O  | -27.487813000 | -37.246729000 | 199.976563000 |
| O  | -28.058831000 | -39.120277000 | 202.556744000 |
| H  | -30.458977000 | -26.814873000 | 200.178953000 |
| C  | -30.241434000 | -27.113395000 | 201.222163000 |
| H  | -30.724377000 | -26.361921000 | 201.871645000 |
| C  | -28.732000000 | -27.331350000 | 201.402217000 |
| C  | -28.187836000 | -28.470813000 | 200.517324000 |
| O  | -28.925853000 | -29.534707000 | 200.437572000 |
| O  | -27.073295000 | -28.331458000 | 199.938266000 |
| C  | -32.924381000 | -41.850903000 | 196.489835000 |
| C  | -31.510347000 | -41.529326000 | 195.968872000 |
| C  | -30.538442000 | -41.367522000 | 197.129314000 |
| C  | -30.071954000 | -42.501448000 | 197.831983000 |
| C  | -30.137957000 | -40.096349000 | 197.598983000 |
| C  | -29.247353000 | -42.382956000 | 198.962722000 |
| C  | -29.305190000 | -39.958180000 | 198.724054000 |
| C  | -28.861205000 | -41.102289000 | 199.416738000 |
| O  | -28.037277000 | -40.944303000 | 200.516044000 |
| H  | -33.785375000 | -32.318034000 | 197.913159000 |
| C  | -32.844739000 | -31.791422000 | 197.688620000 |
| C  | -31.616251000 | -32.678284000 | 197.715611000 |
| O  | -30.464826000 | -32.201018000 | 197.625721000 |
| H  | -32.705936000 | -30.962153000 | 198.402530000 |
| N  | -31.849852000 | -34.021656000 | 197.774454000 |
| C  | -30.825021000 | -35.049751000 | 197.612821000 |
| C  | -31.104029000 | -35.965091000 | 196.396180000 |
| O  | -30.606151000 | -37.097047000 | 196.317256000 |
| C  | -30.587655000 | -35.871234000 | 198.892707000 |
| C  | -29.760449000 | -35.226067000 | 200.005214000 |
| O  | -29.834954000 | -35.698756000 | 201.176394000 |
| O  | -28.952259000 | -34.293351000 | 199.642125000 |
| N  | -31.872009000 | -35.412034000 | 195.420730000 |
| C  | -31.935591000 | -35.967611000 | 194.072817000 |
| H  | -31.190723000 | -35.442656000 | 193.449429000 |
| H  | -21.516057000 | -41.187718000 | 202.032943000 |
| C  | -22.352883000 | -41.458335000 | 202.717392000 |
| C  | -22.784889000 | -42.905644000 | 202.601334000 |
| O  | -23.571081000 | -43.420270000 | 203.417530000 |
| C  | -23.545387000 | -40.500767000 | 202.484359000 |
| C  | -23.067724000 | -39.042178000 | 202.524242000 |
| C  | -24.159845000 | -37.984810000 | 202.597763000 |
| O  | -25.257115000 | -38.082178000 | 202.000654000 |
| O  | -23.815007000 | -36.951462000 | 203.316924000 |
| N  | -22.261174000 | -43.592746000 | 201.546003000 |
| C  | -22.629343000 | -44.962153000 | 201.252063000 |
| H  | -21.726399000 | -45.520632000 | 200.924621000 |
| C  | -23.737842000 | -45.084615000 | 200.179627000 |
| C  | -25.008118000 | -44.434777000 | 200.617045000 |

|   |               |               |               |
|---|---------------|---------------|---------------|
| C | -25.563618000 | -43.201011000 | 200.323237000 |
| N | -25.846830000 | -44.981056000 | 201.578889000 |
| C | -26.851230000 | -44.103928000 | 201.838337000 |
| N | -26.704055000 | -43.015554000 | 201.085131000 |
| H | -19.262626000 | -31.517297000 | 202.779917000 |
| C | -20.112713000 | -31.328697000 | 202.090235000 |
| C | -21.154142000 | -30.545267000 | 202.873712000 |
| O | -21.411164000 | -30.794868000 | 204.072242000 |
| C | -20.721622000 | -32.618848000 | 201.481207000 |
| C | -21.597914000 | -33.360490000 | 202.435275000 |
| C | -22.947530000 | -33.668806000 | 202.411932000 |
| N | -21.138634000 | -33.831817000 | 203.657334000 |
| C | -22.160324000 | -34.394341000 | 204.335146000 |
| N | -23.274459000 | -34.312930000 | 203.596789000 |
| N | -21.820811000 | -29.598905000 | 202.168098000 |
| C | -22.896307000 | -28.815019000 | 202.759171000 |
| H | -22.557559000 | -28.453986000 | 203.752878000 |
| C | -24.187741000 | -29.632690000 | 202.967284000 |
| C | -24.783594000 | -30.158820000 | 201.662710000 |
| C | -25.727746000 | -31.333952000 | 201.801917000 |
| O | -26.037957000 | -31.794152000 | 202.945377000 |
| O | -26.150763000 | -31.818624000 | 200.689505000 |
| H | -24.832764000 | -28.950900000 | 209.207185000 |
| C | -25.289739000 | -29.704836000 | 209.874338000 |
| H | -25.215628000 | -29.314217000 | 210.902923000 |
| C | -24.590334000 | -31.074181000 | 209.714483000 |
| C | -24.532099000 | -31.555301000 | 208.292356000 |
| C | -25.327357000 | -32.429495000 | 207.570143000 |
| N | -23.574412000 | -31.111028000 | 207.382227000 |
| C | -23.764230000 | -31.682029000 | 206.174000000 |
| N | -24.833787000 | -32.480194000 | 206.276429000 |
| H | -24.708982000 | -37.374838000 | 210.156821000 |
| C | -25.333665000 | -37.110846000 | 209.273415000 |
| C | -26.304262000 | -38.220775000 | 208.875291000 |
| O | -26.051679000 | -39.052448000 | 207.981997000 |
| C | -24.386408000 | -36.712813000 | 208.142945000 |
| C | -24.989518000 | -36.018288000 | 206.927584000 |
| O | -26.241343000 | -35.723829000 | 206.913286000 |
| O | -24.173977000 | -35.772368000 | 205.983344000 |
| N | -27.489721000 | -38.237456000 | 209.554442000 |
| C | -28.420988000 | -39.357108000 | 209.469748000 |
| C | -29.305223000 | -39.444958000 | 208.218612000 |
| O | -29.910594000 | -40.499281000 | 207.957941000 |
| N | -29.403071000 | -38.314814000 | 207.484476000 |
| C | -30.095811000 | -38.258714000 | 206.201830000 |
| C | -29.387979000 | -37.248486000 | 205.291465000 |
| O | -29.597987000 | -37.257136000 | 204.066630000 |
| O | -28.619838000 | -36.416139000 | 205.944522000 |
| O | -25.513938000 | -38.418316000 | 197.426206000 |
| O | -27.610101000 | -36.729214000 | 197.444534000 |
| O | -26.562874000 | -30.091508000 | 197.918314000 |
| O | -24.547929000 | -31.805746000 | 198.353696000 |
| O | -29.775031000 | -30.395519000 | 202.804957000 |
| O | -25.829145000 | -39.522984000 | 199.857821000 |
| O | -26.804983000 | -39.029475000 | 205.093408000 |
| H | -30.318434000 | -30.632250000 | 209.002261000 |
| C | -30.997751000 | -31.051074000 | 208.236197000 |
| H | -31.843803000 | -31.521736000 | 208.767318000 |
| C | -30.275862000 | -32.088091000 | 207.368191000 |
| C | -28.978342000 | -31.535575000 | 206.748312000 |
| C | -28.311820000 | -32.544005000 | 205.839737000 |
| O | -28.057518000 | -33.706493000 | 206.333013000 |
| O | -28.042797000 | -32.180154000 | 204.649174000 |
| H | -36.646288000 | -31.795669000 | 206.868871000 |
| C | -36.971479000 | -32.276075000 | 205.926511000 |
| C | -35.758149000 | -32.773302000 | 205.113217000 |
| C | -34.807622000 | -33.666573000 | 205.934679000 |
| C | -33.728604000 | -34.406052000 | 205.131361000 |
| N | -32.745018000 | -33.494497000 | 204.523114000 |
| C | -31.817239000 | -33.875589000 | 203.615441000 |
| N | -31.653853000 | -35.180144000 | 203.329015000 |
| N | -31.099648000 | -32.966858000 | 202.940548000 |
| O | -27.617157000 | -29.289865000 | 204.183383000 |

|   |               |               |               |
|---|---------------|---------------|---------------|
| H | -32.895268000 | -42.755241000 | 197.127297000 |
| H | -33.286308000 | -41.025023000 | 197.131666000 |
| H | -33.700323000 | -42.030393000 | 195.723193000 |
| H | -31.527474000 | -40.603427000 | 195.363411000 |
| H | -31.164222000 | -42.341611000 | 195.299712000 |
| H | -30.364672000 | -43.505190000 | 197.492541000 |
| H | -28.901207000 | -43.278214000 | 199.492967000 |
| H | -28.983567000 | -38.966049000 | 199.066751000 |
| H | -30.465345000 | -39.186672000 | 197.078585000 |
| H | -27.556846000 | -41.880226000 | 200.816132000 |
| H | -25.217889000 | -42.440532000 | 199.620208000 |
| H | -27.654812000 | -44.290972000 | 202.552406000 |
| H | -28.799821000 | -37.518538000 | 207.707213000 |
| H | -27.641288000 | -37.540852000 | 210.282233000 |
| H | -21.549804000 | -29.420619000 | 201.203225000 |
| H | -21.662755000 | -43.096021000 | 200.888759000 |
| H | -22.970855000 | -45.418480000 | 202.197792000 |
| H | -23.900318000 | -46.157656000 | 199.961819000 |
| H | -23.401503000 | -44.612523000 | 199.239231000 |
| H | -22.467457000 | -38.811270000 | 201.620337000 |
| H | -24.026241000 | -40.723785000 | 201.513593000 |
| H | -21.973483000 | -41.314949000 | 203.747298000 |
| H | -22.397044000 | -38.878484000 | 203.386377000 |
| H | -24.311332000 | -40.674858000 | 203.262351000 |
| H | -26.359017000 | -29.779073000 | 209.607727000 |
| H | -26.188637000 | -33.029975000 | 207.864663000 |
| H | -23.127759000 | -31.520954000 | 205.296476000 |
| H | -23.695064000 | -33.506032000 | 201.633040000 |
| H | -22.087903000 | -34.871018000 | 205.312430000 |
| H | -19.698159000 | -30.720019000 | 201.265947000 |
| H | -23.075196000 | -27.939460000 | 202.112889000 |
| H | -29.889579000 | -34.508337000 | 197.374205000 |
| H | -32.810488000 | -34.333130000 | 197.920399000 |
| H | -32.918949000 | -31.346980000 | 196.679472000 |
| H | -32.153582000 | -34.439966000 | 195.541498000 |
| H | -30.785148000 | -28.060242000 | 201.391467000 |
| H | -19.905589000 | -33.270270000 | 201.115490000 |
| H | -21.332465000 | -32.355385000 | 200.599921000 |
| H | -25.921625000 | -36.228887000 | 209.592734000 |
| H | -30.002783000 | -39.246452000 | 205.713227000 |
| C | -31.587309000 | -37.900114000 | 206.346563000 |
| H | -32.079860000 | -37.909436000 | 205.358177000 |
| H | -32.087284000 | -38.646760000 | 206.985980000 |
| H | -31.705058000 | -36.904251000 | 206.810660000 |
| H | -29.093238000 | -39.311330000 | 210.343774000 |
| H | -27.858742000 | -40.306732000 | 209.536504000 |
| H | -23.594387000 | -36.043501000 | 208.527273000 |
| H | -23.864539000 | -37.604361000 | 207.748642000 |
| H | -30.004290000 | -36.767922000 | 198.598971000 |
| H | -31.536620000 | -36.235300000 | 199.324268000 |
| H | -31.383942000 | -30.209280000 | 207.633067000 |
| H | -30.028746000 | -32.985437000 | 207.965182000 |
| H | -28.258393000 | -31.285243000 | 207.553306000 |
| H | -30.944999000 | -32.437790000 | 206.556385000 |
| H | -29.153168000 | -30.615849000 | 206.163555000 |
| H | -28.154192000 | -26.418057000 | 201.176965000 |
| H | -28.490068000 | -27.615166000 | 202.445959000 |
| H | -25.114215000 | -31.841472000 | 210.311663000 |
| H | -23.558269000 | -31.021382000 | 210.110218000 |
| H | -25.267856000 | -33.079902000 | 205.491789000 |
| H | -37.548238000 | -31.526089000 | 205.357493000 |
| H | -35.202306000 | -31.901705000 | 204.713033000 |
| H | -35.397198000 | -34.448895000 | 206.450303000 |
| H | -33.202067000 | -35.111039000 | 205.805620000 |
| H | -37.645767000 | -33.111262000 | 206.190722000 |
| H | -36.112023000 | -33.339605000 | 204.228384000 |
| H | -34.327815000 | -33.072914000 | 206.739504000 |
| H | -32.834421000 | -32.497291000 | 204.706079000 |
| H | -34.203136000 | -35.003860000 | 204.327753000 |
| H | -31.185033000 | -31.959863000 | 203.113202000 |
| H | -31.924614000 | -35.897983000 | 203.994215000 |
| H | -30.191318000 | -33.219481000 | 202.509189000 |
| H | -30.926774000 | -35.443764000 | 202.647936000 |

|   |               |               |               |
|---|---------------|---------------|---------------|
| H | -23.951927000 | -30.483461000 | 203.627579000 |
| H | -25.347737000 | -29.379761000 | 201.110078000 |
| H | -24.932060000 | -29.012973000 | 203.499414000 |
| H | -23.981238000 | -30.490668000 | 200.973012000 |
| H | -20.195091000 | -33.709328000 | 204.022095000 |
| H | -25.855470000 | -33.151596000 | 198.666409000 |
| H | -29.154095000 | -32.015003000 | 198.754783000 |
| H | -28.580808000 | -30.823957000 | 199.788037000 |
| H | -29.685824000 | -29.945749000 | 201.912603000 |
| H | -29.209753000 | -31.199539000 | 202.616276000 |
| H | -27.112610000 | -30.124122000 | 204.248392000 |
| H | -28.453350000 | -29.612376000 | 203.743368000 |
| H | -32.942289000 | -35.827208000 | 193.646560000 |
| H | -31.694172000 | -37.040537000 | 194.113387000 |
| H | -26.622963000 | -40.085511000 | 200.087595000 |
| H | -25.528774000 | -39.110653000 | 200.725407000 |
| H | -27.691304000 | -39.463626000 | 203.405834000 |
| H | -27.554945000 | -36.822070000 | 199.059238000 |
| H | -26.855132000 | -37.364388000 | 197.277156000 |
| H | -25.529722000 | -39.135318000 | 196.764911000 |
| H | -25.584144000 | -38.886278000 | 198.309491000 |
| H | -28.091470000 | -39.855541000 | 201.892516000 |
| H | -26.889036000 | -38.021243000 | 199.828004000 |
| H | -24.683679000 | -31.809291000 | 199.323029000 |
| H | -25.205049000 | -31.080529000 | 198.095448000 |
| H | -27.203912000 | -30.794170000 | 198.194310000 |
| H | -26.679384000 | -29.428459000 | 198.669048000 |
| H | -26.723366000 | -39.092739000 | 206.070721000 |
| H | -26.534827000 | -38.093506000 | 204.877836000 |
| H | -25.712058000 | -45.875194000 | 202.048376000 |
| H | -22.817978000 | -30.459796000 | 207.594384000 |
| C | -27.457578000 | -35.564151000 | 196.617587000 |
| H | -26.432648000 | -35.487886000 | 196.207837000 |
| H | -28.178094000 | -35.602543000 | 195.775483000 |
| H | -27.635736000 | -34.668404000 | 197.238886000 |

W12-1

|    |               |               |               |
|----|---------------|---------------|---------------|
| Mn | -24.850122000 | -35.592197000 | 203.935580000 |
| Mn | -27.330899000 | -35.282252000 | 205.202972000 |
| Mn | -27.310987000 | -33.368061000 | 203.160697000 |
| Mn | -27.567712000 | -33.165910000 | 200.424803000 |
| Ca | -27.885986000 | -36.696511000 | 202.135211000 |
| O  | -26.428754000 | -36.567777000 | 204.176676000 |
| O  | -28.347941000 | -34.766095000 | 203.783037000 |
| O  | -25.986027000 | -34.120567000 | 204.479056000 |
| O  | -28.488894000 | -32.620229000 | 202.005550000 |
| O  | -26.758179000 | -34.311504000 | 201.676521000 |
| O  | -28.428471000 | -31.690393000 | 199.327980000 |
| O  | -26.576667000 | -33.741634000 | 198.987333000 |
| O  | -27.634887000 | -37.144994000 | 199.783127000 |
| O  | -27.831994000 | -39.119020000 | 202.204402000 |
| H  | -30.436415000 | -26.806027000 | 200.177382000 |
| C  | -30.241434000 | -27.113395000 | 201.222163000 |
| H  | -30.724377000 | -26.361921000 | 201.871645000 |
| C  | -28.737933000 | -27.337543000 | 201.435921000 |
| C  | -28.189626000 | -28.488284000 | 200.573656000 |
| O  | -28.960089000 | -29.529687000 | 200.477698000 |
| O  | -27.056521000 | -28.382613000 | 200.028937000 |
| C  | -32.924381000 | -41.850903000 | 196.489835000 |
| C  | -31.523262000 | -41.681650000 | 195.870907000 |
| C  | -30.469837000 | -41.429039000 | 196.932139000 |
| C  | -29.887251000 | -42.500447000 | 197.642762000 |
| C  | -30.096781000 | -40.116248000 | 197.295397000 |
| C  | -28.962130000 | -42.280105000 | 198.676315000 |
| C  | -29.172052000 | -39.875122000 | 198.324247000 |
| C  | -28.600855000 | -40.958805000 | 199.020097000 |
| O  | -27.677565000 | -40.697446000 | 200.013160000 |
| H  | -33.785375000 | -32.318034000 | 197.913159000 |
| C  | -32.844739000 | -31.791422000 | 197.688620000 |
| C  | -31.614024000 | -32.672705000 | 197.698406000 |
| O  | -30.465038000 | -32.189486000 | 197.604905000 |
| H  | -32.702953000 | -30.969274000 | 198.410427000 |

|   |               |               |               |
|---|---------------|---------------|---------------|
| N | -31.846063000 | -34.014564000 | 197.748616000 |
| C | -30.825021000 | -35.049751000 | 197.612821000 |
| C | -31.079956000 | -35.967488000 | 196.396124000 |
| O | -30.547383000 | -37.083387000 | 196.314143000 |
| C | -30.634579000 | -35.847938000 | 198.912845000 |
| C | -29.823751000 | -35.188414000 | 200.029114000 |
| O | -29.891064000 | -35.669935000 | 201.197532000 |
| O | -29.033718000 | -34.234149000 | 199.679539000 |
| N | -31.868265000 | -35.428904000 | 195.426947000 |
| C | -31.935591000 | -35.967611000 | 194.072817000 |
| H | -31.190723000 | -35.442656000 | 193.449429000 |
| H | -21.516057000 | -41.187718000 | 202.032943000 |
| C | -22.352883000 | -41.458335000 | 202.717392000 |
| C | -22.771452000 | -42.909377000 | 202.612823000 |
| O | -23.535332000 | -43.431407000 | 203.444764000 |
| C | -23.547689000 | -40.501771000 | 202.445179000 |
| C | -23.037574000 | -39.053892000 | 202.277224000 |
| C | -24.097330000 | -37.967333000 | 202.409520000 |
| O | -25.121657000 | -37.910392000 | 201.687598000 |
| O | -23.817648000 | -37.081189000 | 203.329387000 |
| N | -22.262970000 | -43.591322000 | 201.544035000 |
| C | -22.629343000 | -44.962153000 | 201.252063000 |
| H | -21.726399000 | -45.520632000 | 200.924621000 |
| C | -23.737514000 | -45.097852000 | 200.182190000 |
| C | -24.961217000 | -44.339695000 | 200.568549000 |
| C | -25.438559000 | -43.111569000 | 200.147794000 |
| N | -25.800877000 | -44.708824000 | 201.610068000 |
| C | -26.729498000 | -43.734324000 | 201.794083000 |
| N | -26.532863000 | -42.754511000 | 200.914042000 |
| H | -19.262626000 | -31.517297000 | 202.779917000 |
| C | -20.112713000 | -31.328697000 | 202.090235000 |
| C | -21.154537000 | -30.545898000 | 202.873323000 |
| O | -21.424262000 | -30.808729000 | 204.066043000 |
| C | -20.726397000 | -32.620917000 | 201.487221000 |
| C | -21.599044000 | -33.378256000 | 202.435321000 |
| C | -22.936776000 | -33.735340000 | 202.386989000 |
| N | -21.143047000 | -33.848769000 | 203.658832000 |
| C | -22.154369000 | -34.456726000 | 204.313269000 |
| N | -23.259541000 | -34.406924000 | 203.558374000 |
| N | -21.810427000 | -29.588863000 | 202.171750000 |
| C | -22.896307000 | -28.815019000 | 202.759171000 |
| H | -22.557559000 | -28.453986000 | 203.752878000 |
| C | -24.182979000 | -29.648217000 | 202.954733000 |
| C | -24.726616000 | -30.231324000 | 201.650357000 |
| C | -25.720531000 | -31.368152000 | 201.791748000 |
| O | -25.987115000 | -31.864806000 | 202.935363000 |
| O | -26.217688000 | -31.783311000 | 200.686962000 |
| H | -24.789133000 | -28.971716000 | 209.215058000 |
| C | -25.289739000 | -29.704836000 | 209.874338000 |
| H | -25.215628000 | -29.314217000 | 210.902923000 |
| C | -24.652948000 | -31.105811000 | 209.718283000 |
| C | -24.591783000 | -31.592151000 | 208.296253000 |
| C | -25.365111000 | -32.493217000 | 207.582009000 |
| N | -23.640273000 | -31.139759000 | 207.382903000 |
| C | -23.813309000 | -31.729799000 | 206.181669000 |
| N | -24.865245000 | -32.550884000 | 206.290024000 |
| H | -24.708982000 | -37.374838000 | 210.156821000 |
| C | -25.333665000 | -37.110846000 | 209.273415000 |
| C | -26.231885000 | -38.308134000 | 208.987036000 |
| O | -25.830890000 | -39.303727000 | 208.363466000 |
| C | -24.393340000 | -36.763413000 | 208.121308000 |
| C | -24.997853000 | -36.100522000 | 206.890274000 |
| O | -26.251256000 | -35.817253000 | 206.864797000 |
| O | -24.180651000 | -35.868219000 | 205.942344000 |
| N | -27.499855000 | -38.232523000 | 209.499764000 |
| C | -28.420988000 | -39.357108000 | 209.469748000 |
| C | -29.339619000 | -39.460604000 | 208.237319000 |
| O | -29.999467000 | -40.493258000 | 208.029753000 |
| N | -29.394988000 | -38.355604000 | 207.458476000 |
| C | -30.135523000 | -38.277455000 | 206.201531000 |
| C | -29.367215000 | -37.352612000 | 205.240111000 |
| O | -29.491963000 | -37.451415000 | 204.007209000 |
| O | -28.631625000 | -36.484653000 | 205.881255000 |



|   |               |               |               |
|---|---------------|---------------|---------------|
| O | -25.580528000 | -37.604346000 | 196.993951000 |
| O | -27.578371000 | -35.736178000 | 197.579419000 |
| O | -26.466437000 | -30.186074000 | 198.069160000 |
| O | -24.566628000 | -32.018351000 | 198.226345000 |
| O | -29.786662000 | -30.416452000 | 202.857161000 |
| O | -25.613938000 | -39.077142000 | 199.328904000 |
| O | -26.138199000 | -39.246858000 | 204.302812000 |
| H | -30.318392000 | -30.626274000 | 208.998527000 |
| C | -30.997751000 | -31.051074000 | 208.236197000 |
| H | -31.843803000 | -31.521736000 | 208.767318000 |
| C | -30.280137000 | -32.113552000 | 207.382333000 |
| C | -28.966678000 | -31.603505000 | 206.755820000 |
| C | -28.304435000 | -32.619105000 | 205.842828000 |
| O | -28.071789000 | -33.795332000 | 206.311265000 |
| O | -27.999861000 | -32.233971000 | 204.665400000 |
| H | -36.647256000 | -31.794805000 | 206.868827000 |
| C | -36.971479000 | -32.276075000 | 205.926511000 |
| C | -35.758734000 | -32.782796000 | 205.121748000 |
| C | -34.831508000 | -33.691143000 | 205.952760000 |
| C | -33.750602000 | -34.436751000 | 205.159672000 |
| N | -32.751312000 | -33.528671000 | 204.573645000 |
| C | -31.805415000 | -33.914768000 | 203.686361000 |
| N | -31.620753000 | -35.218171000 | 203.423573000 |
| N | -31.073908000 | -33.006996000 | 203.025463000 |
| O | -27.590178000 | -29.340007000 | 204.204043000 |
| H | -32.939758000 | -42.702519000 | 197.195330000 |
| H | -33.210002000 | -40.945628000 | 197.057500000 |
| H | -33.700323000 | -42.030393000 | 195.723193000 |
| H | -31.535069000 | -40.841158000 | 195.150767000 |
| H | -31.263818000 | -42.589807000 | 195.292236000 |
| H | -30.160197000 | -43.533177000 | 197.383479000 |
| H | -28.516604000 | -43.127287000 | 199.210560000 |
| H | -28.880729000 | -38.852609000 | 198.596097000 |
| H | -30.523221000 | -39.254167000 | 196.767099000 |
| H | -27.275834000 | -41.608882000 | 200.457874000 |
| H | -25.068466000 | -42.470697000 | 199.345060000 |
| H | -27.516504000 | -43.777565000 | 202.548347000 |
| H | -28.758122000 | -37.578077000 | 207.653401000 |
| H | -27.757004000 | -37.409588000 | 210.042000000 |
| H | -21.528902000 | -29.399636000 | 201.212028000 |
| H | -21.686520000 | -43.086146000 | 200.873699000 |
| H | -22.967940000 | -45.414472000 | 202.200745000 |
| H | -23.957996000 | -46.172841000 | 200.037740000 |
| H | -23.376026000 | -44.708627000 | 199.213606000 |
| H | -22.573457000 | -38.934848000 | 201.278020000 |
| H | -24.089033000 | -40.818327000 | 201.533426000 |
| H | -21.985480000 | -41.289874000 | 203.747029000 |
| H | -22.253419000 | -38.841733000 | 203.024334000 |
| H | -24.273531000 | -40.557734000 | 203.275865000 |
| H | -26.357003000 | -29.728566000 | 209.590548000 |
| H | -26.213884000 | -33.108655000 | 207.881984000 |
| H | -23.178791000 | -31.567048000 | 205.303449000 |
| H | -23.678795000 | -33.586456000 | 201.600128000 |
| H | -22.080145000 | -34.937465000 | 205.288575000 |
| H | -19.699312000 | -30.724710000 | 201.262252000 |
| H | -23.079441000 | -27.940782000 | 202.112492000 |
| H | -29.868885000 | -34.535550000 | 197.391553000 |
| H | -32.806126000 | -34.322977000 | 197.905358000 |
| H | -32.926066000 | -31.334158000 | 196.685672000 |
| H | -32.169006000 | -34.464170000 | 195.559668000 |
| H | -30.794663000 | -28.056682000 | 201.377013000 |
| H | -19.911586000 | -33.269647000 | 201.113670000 |
| H | -21.340543000 | -32.356071000 | 200.608453000 |
| H | -25.935666000 | -36.230634000 | 209.563378000 |
| H | -30.169733000 | -39.286088000 | 205.750960000 |
| C | -31.575409000 | -37.763268000 | 206.395691000 |
| H | -32.118768000 | -37.774218000 | 205.434033000 |
| H | -32.112573000 | -38.424456000 | 207.096203000 |
| H | -31.569603000 | -36.739189000 | 206.809885000 |
| H | -29.078359000 | -39.302709000 | 210.355594000 |
| H | -27.858742000 | -40.306732000 | 209.536504000 |
| H | -23.584599000 | -36.095481000 | 208.471381000 |
| H | -23.891106000 | -37.678927000 | 207.755472000 |

|   |               |               |               |
|---|---------------|---------------|---------------|
| H | -30.062904000 | -36.764016000 | 198.664422000 |
| H | -31.599937000 | -36.183020000 | 199.332676000 |
| H | -31.380359000 | -30.218263000 | 207.619108000 |
| H | -30.055230000 | -33.006321000 | 207.995172000 |
| H | -28.240366000 | -31.364264000 | 207.558822000 |
| H | -30.953447000 | -32.463220000 | 206.574036000 |
| H | -29.119363000 | -30.681101000 | 206.168665000 |
| H | -28.148582000 | -26.430329000 | 201.216032000 |
| H | -28.521317000 | -27.613309000 | 202.487346000 |
| H | -25.219976000 | -31.850355000 | 210.304608000 |
| H | -23.625424000 | -31.102244000 | 210.129713000 |
| H | -25.282420000 | -33.157472000 | 205.503592000 |
| H | -37.548238000 | -31.526089000 | 205.357493000 |
| H | -35.188528000 | -31.916133000 | 204.730955000 |
| H | -35.438300000 | -34.468919000 | 206.454909000 |
| H | -33.238666000 | -35.149895000 | 205.835879000 |
| H | -37.649301000 | -33.108056000 | 206.192449000 |
| H | -36.110043000 | -33.341741000 | 204.231275000 |
| H | -34.356085000 | -33.107707000 | 206.767483000 |
| H | -32.866993000 | -32.528233000 | 204.720121000 |
| H | -34.223393000 | -35.024115000 | 204.346827000 |
| H | -31.154362000 | -31.999464000 | 203.197151000 |
| H | -32.015829000 | -35.943502000 | 204.011544000 |
| H | -30.175972000 | -33.266760000 | 202.581845000 |
| H | -30.927167000 | -35.495381000 | 202.714918000 |
| H | -23.959368000 | -30.470459000 | 203.653816000 |
| H | -25.220233000 | -29.464994000 | 201.021544000 |
| H | -24.956192000 | -29.021937000 | 203.435946000 |
| H | -23.896047000 | -30.641150000 | 201.039260000 |
| H | -20.210090000 | -33.698678000 | 204.040288000 |
| H | -25.803618000 | -33.146952000 | 198.742148000 |
| H | -29.210756000 | -31.970145000 | 198.767969000 |
| H | -28.645520000 | -30.765763000 | 199.829850000 |
| H | -29.725544000 | -29.954079000 | 201.971334000 |
| H | -29.209842000 | -31.207959000 | 202.645512000 |
| H | -27.120607000 | -30.193246000 | 204.284973000 |
| H | -28.439615000 | -29.636506000 | 203.772469000 |
| H | -32.943529000 | -35.819112000 | 193.652559000 |
| H | -31.698829000 | -37.042495000 | 194.100021000 |
| H | -26.318410000 | -39.759194000 | 199.518013000 |
| H | -25.321797000 | -38.747823000 | 200.231230000 |
| H | -27.093734000 | -39.400670000 | 202.815659000 |
| H | -27.683912000 | -36.562214000 | 198.942870000 |
| H | -26.825287000 | -36.284926000 | 197.232625000 |
| H | -27.153543000 | -34.929443000 | 198.011309000 |
| H | -25.886537000 | -38.217505000 | 196.299587000 |
| H | -25.545719000 | -38.166279000 | 197.817332000 |
| H | -27.813284000 | -39.701605000 | 201.399433000 |
| H | -26.944964000 | -37.815834000 | 199.550249000 |
| H | -24.039406000 | -31.866453000 | 199.030856000 |
| H | -25.206464000 | -31.224324000 | 198.204909000 |
| H | -27.163166000 | -30.848814000 | 198.312932000 |
| H | -26.593690000 | -29.513120000 | 198.807929000 |
| H | -26.204788000 | -38.251640000 | 204.400009000 |
| H | -25.698575000 | -45.538864000 | 202.191852000 |
| H | -22.897908000 | -30.470437000 | 207.588819000 |
| C | -26.965828000 | -39.857052000 | 205.312022000 |
| H | -26.810987000 | -39.399503000 | 206.304982000 |
| H | -28.038399000 | -39.801838000 | 205.037848000 |
| H | -26.681538000 | -40.921336000 | 205.375556000 |

W12-2

|    |               |               |               |
|----|---------------|---------------|---------------|
| Mn | -24.879708000 | -35.554198000 | 203.926742000 |
| Mn | -27.357976000 | -35.244761000 | 205.203491000 |
| Mn | -27.328286000 | -33.341727000 | 203.155375000 |
| Mn | -27.567295000 | -33.156973000 | 200.416939000 |
| Ca | -27.896803000 | -36.687736000 | 202.123598000 |
| O  | -26.460526000 | -36.521036000 | 204.164967000 |
| O  | -28.371807000 | -34.728684000 | 203.783521000 |
| O  | -26.006613000 | -34.084970000 | 204.482471000 |
| O  | -28.498967000 | -32.602566000 | 201.988632000 |
| O  | -26.766173000 | -34.297509000 | 201.679788000 |

|   |               |               |               |
|---|---------------|---------------|---------------|
| O | -28.423395000 | -31.684620000 | 199.311978000 |
| O | -26.565975000 | -33.740845000 | 198.988771000 |
| O | -27.630742000 | -37.174829000 | 199.791696000 |
| O | -28.067115000 | -39.107051000 | 202.262399000 |
| H | -30.446838000 | -26.811775000 | 200.177651000 |
| C | -30.241434000 | -27.113395000 | 201.222163000 |
| H | -30.724377000 | -26.361921000 | 201.871645000 |
| C | -28.735301000 | -27.331171000 | 201.422598000 |
| C | -28.188769000 | -28.482003000 | 200.558962000 |
| O | -28.959092000 | -29.523368000 | 200.461458000 |
| O | -27.055021000 | -28.376670000 | 200.015137000 |
| C | -32.924381000 | -41.850903000 | 196.489835000 |
| C | -31.518745000 | -41.660763000 | 195.888670000 |
| C | -30.484037000 | -41.429502000 | 196.973685000 |
| C | -29.905886000 | -42.516366000 | 197.664461000 |
| C | -30.131591000 | -40.124651000 | 197.383831000 |
| C | -29.004668000 | -42.319369000 | 198.723811000 |
| C | -29.231212000 | -39.907046000 | 198.439171000 |
| C | -28.664326000 | -41.005894000 | 199.114268000 |
| O | -27.761439000 | -40.762345000 | 200.131428000 |
| H | -33.785375000 | -32.318034000 | 197.913159000 |
| C | -32.844739000 | -31.791422000 | 197.688620000 |
| C | -31.614277000 | -32.672912000 | 197.696335000 |
| O | -30.465531000 | -32.190131000 | 197.597490000 |
| H | -32.702124000 | -30.970152000 | 198.411290000 |
| N | -31.845977000 | -34.014760000 | 197.750720000 |
| C | -30.825021000 | -35.049751000 | 197.612821000 |
| C | -31.083811000 | -35.969145000 | 196.397535000 |
| O | -30.556155000 | -37.087821000 | 196.318096000 |
| C | -30.628001000 | -35.846139000 | 198.911376000 |
| C | -29.818381000 | -35.178969000 | 200.022634000 |
| O | -29.889210000 | -35.649009000 | 201.194350000 |
| O | -29.023658000 | -34.230831000 | 199.664757000 |
| N | -31.867963000 | -35.428297000 | 195.426717000 |
| C | -31.935591000 | -35.967611000 | 194.072817000 |
| H | -31.190723000 | -35.442656000 | 193.449429000 |
| H | -21.516057000 | -41.187718000 | 202.032943000 |
| C | -22.352883000 | -41.458335000 | 202.717392000 |
| C | -22.757846000 | -42.914820000 | 202.623452000 |
| O | -23.507252000 | -43.439240000 | 203.466935000 |
| C | -23.548380000 | -40.528802000 | 202.378912000 |
| C | -23.082833000 | -39.061542000 | 202.385397000 |
| C | -24.172604000 | -37.999476000 | 202.462868000 |
| O | -25.238279000 | -38.046463000 | 201.805451000 |
| O | -23.857422000 | -37.019380000 | 203.267585000 |
| N | -22.262781000 | -43.591889000 | 201.546176000 |
| C | -22.629343000 | -44.962153000 | 201.252063000 |
| H | -21.726399000 | -45.520632000 | 200.924621000 |
| C | -23.739955000 | -45.095311000 | 200.185213000 |
| C | -24.975296000 | -44.367368000 | 200.593100000 |
| C | -25.482936000 | -43.142419000 | 200.198954000 |
| N | -25.801348000 | -44.776237000 | 201.630945000 |
| C | -26.752224000 | -43.827761000 | 201.837231000 |
| N | -26.582306000 | -42.826316000 | 200.976288000 |
| H | -19.262626000 | -31.517297000 | 202.779917000 |
| C | -20.112713000 | -31.328697000 | 202.090235000 |
| C | -21.153401000 | -30.544446000 | 202.873506000 |
| O | -21.420700000 | -30.804561000 | 204.067348000 |
| C | -20.728383000 | -32.622157000 | 201.491672000 |
| C | -21.608357000 | -33.369325000 | 202.440944000 |
| C | -22.950920000 | -33.707397000 | 202.393830000 |
| N | -21.158475000 | -33.844064000 | 203.665120000 |
| C | -22.178079000 | -34.436864000 | 204.320915000 |
| N | -23.282610000 | -34.372383000 | 203.566355000 |
| N | -21.811997000 | -29.590153000 | 202.170921000 |
| C | -22.896307000 | -28.815019000 | 202.759171000 |
| H | -22.557559000 | -28.453986000 | 203.752878000 |
| C | -24.184921000 | -29.644139000 | 202.952559000 |
| C | -24.734210000 | -30.214843000 | 201.645081000 |
| C | -25.728323000 | -31.350945000 | 201.783872000 |
| O | -26.003913000 | -31.839404000 | 202.928697000 |
| O | -26.217254000 | -31.773310000 | 200.678216000 |
| H | -24.794474000 | -28.968993000 | 209.214102000 |

|   |               |               |               |
|---|---------------|---------------|---------------|
| C | -25.289739000 | -29.704836000 | 209.874338000 |
| H | -25.215628000 | -29.314217000 | 210.902923000 |
| C | -24.644724000 | -31.101739000 | 209.718735000 |
| C | -24.584064000 | -31.585293000 | 208.296349000 |
| C | -25.363175000 | -32.478348000 | 207.578781000 |
| N | -23.631184000 | -31.133315000 | 207.384378000 |
| C | -23.809024000 | -31.716251000 | 206.180355000 |
| N | -24.865235000 | -32.532090000 | 206.286096000 |
| H | -24.708982000 | -37.374838000 | 210.156821000 |
| C | -25.333665000 | -37.110846000 | 209.273415000 |
| C | -26.211731000 | -38.334326000 | 209.043129000 |
| O | -25.763941000 | -39.378101000 | 208.540639000 |
| C | -24.409417000 | -36.783917000 | 208.102233000 |
| C | -25.019125000 | -36.103637000 | 206.880679000 |
| O | -26.267756000 | -35.802012000 | 206.864969000 |
| O | -24.204254000 | -35.877920000 | 205.928392000 |
| N | -27.502356000 | -38.233313000 | 209.483495000 |
| C | -28.420988000 | -39.357108000 | 209.469748000 |
| C | -29.332307000 | -39.478044000 | 208.232980000 |
| O | -30.045030000 | -40.485404000 | 208.076158000 |
| N | -29.310008000 | -38.425329000 | 207.387072000 |
| C | -30.016608000 | -38.390999000 | 206.109470000 |
| C | -29.347688000 | -37.347621000 | 205.205105000 |
| O | -29.529007000 | -37.363586000 | 203.976265000 |
| O | -28.635726000 | -36.475503000 | 205.871772000 |
| O | -25.476208000 | -37.646525000 | 197.123975000 |
| O | -27.511614000 | -35.772986000 | 197.593858000 |
| O | -26.459749000 | -30.180398000 | 198.056393000 |
| O | -24.561064000 | -32.014778000 | 198.220592000 |
| O | -29.810578000 | -30.405714000 | 202.834309000 |
| O | -25.684227000 | -39.184923000 | 199.418764000 |
| O | -26.807164000 | -39.098305000 | 204.663409000 |
| H | -30.317378000 | -30.630799000 | 209.000316000 |
| C | -30.997751000 | -31.051074000 | 208.236197000 |
| H | -31.843803000 | -31.521736000 | 208.767318000 |
| C | -30.280599000 | -32.102246000 | 207.374232000 |
| C | -28.973056000 | -31.574954000 | 206.751383000 |
| C | -28.313035000 | -32.585789000 | 205.836294000 |
| O | -28.081388000 | -33.761433000 | 206.308578000 |
| O | -28.016386000 | -32.204276000 | 204.656301000 |
| H | -36.650833000 | -31.794046000 | 206.869764000 |
| C | -36.971479000 | -32.276075000 | 205.926511000 |
| C | -35.754110000 | -32.781334000 | 205.127133000 |
| C | -34.816797000 | -33.668031000 | 205.970898000 |
| C | -33.731363000 | -34.418958000 | 205.188733000 |
| N | -32.748135000 | -33.512659000 | 204.573304000 |
| C | -31.812087000 | -33.905985000 | 203.679716000 |
| N | -31.627902000 | -35.212699000 | 203.429134000 |
| N | -31.097443000 | -33.004066000 | 202.991372000 |
| O | -27.623865000 | -29.315813000 | 204.191157000 |
| H | -32.935211000 | -42.710486000 | 197.185965000 |
| H | -33.221406000 | -40.956262000 | 197.068572000 |
| H | -33.700323000 | -42.030393000 | 195.723193000 |
| H | -31.524534000 | -40.802881000 | 195.189330000 |
| H | -31.246865000 | -42.553880000 | 195.292758000 |
| H | -30.164134000 | -43.543216000 | 197.369258000 |
| H | -28.562138000 | -43.178181000 | 199.241820000 |
| H | -28.951487000 | -38.891072000 | 198.745844000 |
| H | -30.553129000 | -39.251061000 | 196.870138000 |
| H | -27.349504000 | -41.677851000 | 200.553591000 |
| H | -25.131661000 | -42.477494000 | 199.407291000 |
| H | -27.534540000 | -43.903709000 | 202.593971000 |
| H | -28.638819000 | -37.668807000 | 207.545757000 |
| H | -27.800252000 | -37.366501000 | 209.927763000 |
| H | -21.531146000 | -29.401508000 | 201.210887000 |
| H | -21.693270000 | -43.083990000 | 200.871901000 |
| H | -22.965878000 | -45.415901000 | 202.200854000 |
| H | -23.943240000 | -46.170953000 | 200.021494000 |
| H | -23.389862000 | -44.682268000 | 199.222335000 |
| H | -22.499043000 | -38.847922000 | 201.467010000 |
| H | -23.968778000 | -40.795665000 | 201.391141000 |
| H | -22.015739000 | -41.264219000 | 203.752116000 |
| H | -22.398161000 | -38.881864000 | 203.232809000 |

|   |               |               |               |
|---|---------------|---------------|---------------|
| H | -24.356140000 | -40.690011000 | 203.112392000 |
| H | -26.357301000 | -29.735158000 | 209.592439000 |
| H | -26.215195000 | -33.090373000 | 207.876569000 |
| H | -23.174526000 | -31.552208000 | 205.302330000 |
| H | -23.690681000 | -33.550765000 | 201.606328000 |
| H | -22.110153000 | -34.919685000 | 205.295635000 |
| H | -19.699657000 | -30.726606000 | 201.260742000 |
| H | -23.077102000 | -27.939605000 | 202.113272000 |
| H | -29.871108000 | -34.533067000 | 197.387037000 |
| H | -32.805527000 | -34.323265000 | 197.910400000 |
| H | -32.926603000 | -31.332902000 | 196.686307000 |
| H | -32.166311000 | -34.462695000 | 195.558620000 |
| H | -30.790010000 | -28.058031000 | 201.385270000 |
| H | -19.914723000 | -33.276239000 | 201.125141000 |
| H | -21.338249000 | -32.360057000 | 200.609138000 |
| H | -25.938256000 | -36.230162000 | 209.554435000 |
| H | -29.899510000 | -39.370158000 | 205.608337000 |
| C | -31.516057000 | -38.069179000 | 206.265181000 |
| H | -32.013566000 | -38.091120000 | 205.279483000 |
| H | -31.991750000 | -38.827580000 | 206.908909000 |
| H | -31.653289000 | -37.075672000 | 206.729083000 |
| H | -29.079784000 | -39.300527000 | 210.354450000 |
| H | -27.858742000 | -40.306732000 | 209.536504000 |
| H | -23.578349000 | -36.135326000 | 208.435703000 |
| H | -23.934003000 | -37.710696000 | 207.727677000 |
| H | -30.050898000 | -36.758680000 | 198.662212000 |
| H | -31.590012000 | -36.186267000 | 199.334409000 |
| H | -31.381550000 | -30.212974000 | 207.626805000 |
| H | -30.047784000 | -32.998735000 | 207.978381000 |
| H | -28.247851000 | -31.336105000 | 207.555404000 |
| H | -30.952957000 | -32.449080000 | 206.563964000 |
| H | -29.132704000 | -30.650852000 | 206.168924000 |
| H | -28.151596000 | -26.422270000 | 201.194563000 |
| H | -28.505833000 | -27.603876000 | 202.472164000 |
| H | -25.206928000 | -31.849351000 | 210.305760000 |
| H | -23.616735000 | -31.091914000 | 210.128725000 |
| H | -25.289431000 | -33.133064000 | 205.498197000 |
| H | -37.548238000 | -31.526089000 | 205.357493000 |
| H | -35.192676000 | -31.914400000 | 204.724555000 |
| H | -35.415488000 | -34.441898000 | 206.488583000 |
| H | -33.205949000 | -35.110054000 | 205.878222000 |
| H | -37.648457000 | -33.109118000 | 206.191093000 |
| H | -36.099880000 | -33.355788000 | 204.244424000 |
| H | -34.344566000 | -33.065772000 | 206.773703000 |
| H | -32.863701000 | -32.511206000 | 204.712917000 |
| H | -34.201035000 | -35.030895000 | 204.392616000 |
| H | -31.177687000 | -31.995280000 | 203.156735000 |
| H | -31.966910000 | -35.929431000 | 204.061997000 |
| H | -30.197012000 | -33.265424000 | 202.554428000 |
| H | -30.915301000 | -35.489367000 | 202.740487000 |
| H | -23.962825000 | -30.472695000 | 203.644717000 |
| H | -25.231728000 | -29.442966000 | 201.025835000 |
| H | -24.953794000 | -29.017355000 | 203.440131000 |
| H | -23.907549000 | -30.619056000 | 201.025398000 |
| H | -20.223495000 | -33.705527000 | 204.046021000 |
| H | -25.794754000 | -33.143378000 | 198.744284000 |
| H | -29.207072000 | -31.964724000 | 198.754015000 |
| H | -28.641278000 | -30.759721000 | 199.813762000 |
| H | -29.735714000 | -29.943418000 | 201.949366000 |
| H | -29.233498000 | -31.198688000 | 202.630144000 |
| H | -27.141191000 | -30.162665000 | 204.260357000 |
| H | -28.471639000 | -29.620261000 | 203.762261000 |
| H | -32.943540000 | -35.819476000 | 193.652425000 |
| H | -31.698801000 | -37.042453000 | 194.100500000 |
| H | -26.401751000 | -39.853089000 | 199.614263000 |
| H | -25.396935000 | -38.868326000 | 200.325157000 |
| H | -27.545478000 | -39.427721000 | 203.047439000 |
| H | -27.657513000 | -36.596451000 | 198.945983000 |
| H | -26.741397000 | -36.317431000 | 197.280773000 |
| H | -27.107988000 | -34.955797000 | 198.027729000 |
| H | -25.690051000 | -38.224923000 | 196.368028000 |
| H | -25.531149000 | -38.248408000 | 197.916075000 |
| H | -27.955971000 | -39.746425000 | 201.511030000 |

|   |               |               |               |
|---|---------------|---------------|---------------|
| H | -26.961482000 | -37.871992000 | 199.573745000 |
| H | -24.028708000 | -31.854588000 | 199.020077000 |
| H | -25.200184000 | -31.220537000 | 198.194699000 |
| H | -27.154770000 | -30.845086000 | 198.299607000 |
| H | -26.589506000 | -29.507768000 | 198.795005000 |
| H | -26.654854000 | -38.109665000 | 204.586476000 |
| H | -25.681956000 | -45.618896000 | 202.191020000 |
| H | -22.885125000 | -30.469067000 | 207.593245000 |
| C | -25.635512000 | -39.639227000 | 205.296494000 |
| H | -25.663111000 | -39.482668000 | 206.390623000 |
| H | -25.605474000 | -40.725246000 | 205.098947000 |
| H | -24.708710000 | -39.180626000 | 204.896224000 |
